# Supplementary material for: Cannabidiol sensitizes TRPV2 channels to activation by 2-APB
Source: eLife. 2023 May 18;12:e86166. doi: 10.7554/eLife.86166 (PMC10195083; doi:10.7554/eLife.86166)
Supplement: Figure 1—figure supplement 2—source data 1. [file elife-86166-fig1-figsupp2-data1.xlsx]

## Sheet: rTRPV1
																													Current	Current
	Temperature	Current		Temperature	Current		Temperature	Current		Temperature	Current		Temperature	Current		Temperature	Current		Temperature	Current		Temperature	Current		Temperature	Current			mean	SEM		Temperature
	21.1986	1		21.1986	1		21.1986	1		21.1986	0.999999		21.1986	1		21.1986	1		21.1986	0.999999		21.1986	1		21.1986	1			1	1.40836e-07		21.1986
	23.8304	0.873395		23.8304	0.794767		23.8304	0.934013		23.8304	0.843584		23.8304	1.16144		23.8304	1.08986		23.8304	1.19623		23.8304	1.13455		23.8304	1.18902			1.04592	0.0418462		23.8304
	25.5561	0.976615		25.5561	0.866554		25.5561	0.978835		25.5561	0.783318		25.5561	1.25555		25.5561	1.16271		25.5561	1.14714		25.5561	1.15112		25.5561	1.18381			1.04407	0.0447883		25.5561
	26.7225	0.961957		26.7225	0.882814		26.7225	0.932593		26.7225	0.878749		26.7225	1.01729		26.7225	1.08045		26.7225	1.16624		26.7225	0.834821		26.7225	1.26561			1.03117	0.0429457		26.7225
	27.543	1.05325		27.543	0.749568		27.543	0.972344		27.543	0.908671		27.543	1.17845		27.543	1.02385		27.543	1.11511		27.543	0.994116		27.543	1.27064			1.04557	0.0327007		27.543
	28.1492	0.966641		28.1492	1.12333		28.1492	0.880691		28.1492	0.889223		28.1492	1.17004		28.1492	1.03054		28.1492	1.04784		28.1492	1.16593		28.1492	1.13267			0.995315	0.0383081		28.1492
	28.6218	1.04657		28.6218	0.93108		28.6218	1.03025		28.6218	0.848161		28.6218	1.21096		28.6218	1.12701		28.6218	1.33531		28.6218	1.03525		28.6218	1.068			1.07909	0.0465244		28.6218
	29.0108	1.02838		29.0108	0.984767		29.0108	0.953961		29.0108	1.13412		29.0108	1.11056		29.0108	1.32983		29.0108	1.06255		29.0108	1.3385		29.0108	1.16672			1.15752	0.057178		29.0108
	29.3468	1.35162		29.3468	0.991925		29.3468	1.07574		29.3468	1.40854		29.3468	1.13647		29.3468	1.66999		29.3468	1.41585		29.3468	1.3265		29.3468	1.35646			1.39305	0.0790573		29.3468
	29.6487	1.5541		29.6487	1.88691		29.6487	1.19648		29.6487	1.34497		29.6487	1.22052		29.6487	1.78036		29.6487	1.83167		29.6487	1.33272		29.6487	1.43023			1.50378	0.0840565		29.6487
	29.9281	1.94232		29.9281	1.44995		29.9281	1.51965		29.9281	1.53054		29.9281	1.50614		29.9281	2.12456		29.9281	2.21136		29.9281	2.24369		29.9281	1.73332			1.85413	0.120923		29.9281
	30.1923	2.17134		30.1923	1.83271		30.1923	1.43058		30.1923	1.78661		30.1923	1.58756		30.1923	2.3918		30.1923	1.95668		30.1923	2.46821		30.1923	2.14463			1.99289	0.134708		30.1923
	30.4457	2.39816		30.4457	2.05482		30.4457	1.52467		30.4457	1.63116		30.4457	1.94858		30.4457	2.30969		30.4457	2.03623		30.4457	2.36368		30.4457	2.0729			2.03383	0.113026		30.4457
	30.6911	2.1865		30.6911	1.91104		30.6911	1.60316		30.6911	1.66859		30.6911	2.2397		30.6911	2.59148		30.6911	2.50537		30.6911	2.44311		30.6911	2.15379			2.14656	0.151547		30.6911
	30.9302	2.21617		30.9302	1.82248		30.9302	1.50865		30.9302	1.80928		30.9302	2.15774		30.9302	2.67338		30.9302	2.72095		30.9302	2.37824		30.9302	2.28177			2.17748	0.149144		30.9302
	31.1641	2.2742		31.1641	1.51335		31.1641	1.49614		31.1641	2.08625		31.1641	2.32568		31.1641	2.52479		31.1641	2.67768		31.1641	2.91755		31.1641	2.11576			2.2398	0.155016		31.1641
	31.3933	2.2276		31.3933	2.1217		31.3933	1.65825		31.3933	2.13541		31.3933	2.15065		31.3933	2.67226		31.3933	2.56203		31.3933	2.85116		31.3933	2.40212			2.3043	0.142359		31.3933
	31.6185	2.14238		31.6185	2.26067		31.6185	1.56007		31.6185	2.19491		31.6185	2.36044		31.6185	2.79279		31.6185	2.73978		31.6185	2.91583		31.6185	2.36051			2.33421	0.166085		31.6185
	31.8399	2.02887		31.8399	1.97639		31.8399	1.64999		31.8399	2.13868		31.8399	2.61963		31.8399	2.8824		31.8399	3.36373		31.8399	3.24605		31.8399	2.46211			2.48232	0.212103		31.8399
	32.0577	2.03861		32.0577	1.73352		32.0577	1.70776		32.0577	2.287		32.0577	2.5167		32.0577	2.84145		32.0577	3.43534		32.0577	3.13598		32.0577	2.3452			2.50269	0.210856		32.0577
	32.272	2.016		32.272	1.92382		32.272	1.58569		32.272	2.71337		32.272	2.70832		32.272	2.94617		32.272	3.92084		32.272	3.80275		32.272	2.67847			2.72234	0.264038		32.272
	32.4829	2.08125		32.4829	1.4748		32.4829	1.6545		32.4829	2.30153		32.4829	2.84114		32.4829	2.85646		32.4829	3.62172		32.4829	4.37542		32.4829	2.66			2.70964	0.281458		32.4829
	32.6906	1.85668		32.6906	1.62441		32.6906	1.67689		32.6906	2.76741		32.6906	2.94855		32.6906	2.93843		32.6906	3.63251		32.6906	4.32723		32.6906	2.63993			2.72004	0.281145		32.6906
	32.895	2.03862		32.895	1.9318		32.895	1.7244		32.895	2.5382		32.895	2.84484		32.895	3.10394		32.895	4.08771		32.895	4.1554		32.895	2.68634			2.80045	0.285208		32.895
	33.0963	2.00999		33.0963	1.93763		33.0963	1.7126		33.0963	2.58884		33.0963	2.96779		33.0963	3.46164		33.0963	4.19442		33.0963	4.18505		33.0963	2.87174			2.89063	0.294279		33.0963
	33.2945	2.14451		33.2945	2.04838		33.2945	1.88887		33.2945	3.00329		33.2945	3.18242		33.2945	3.07983		33.2945	4.39865		33.2945	4.59214		33.2945	2.91085			2.97707	0.289353		33.2945
	33.4897	2.26731		33.4897	2.01259		33.4897	1.95911		33.4897	2.81842		33.4897	3.36755		33.4897	3.47944		33.4897	4.35855		33.4897	4.45217		33.4897	3.02573			3.09009	0.287107		33.4897
	33.6819	2.29119		33.6819	2.33614		33.6819	2.02202		33.6819	3.09113		33.6819	3.12886		33.6819	3.44369		33.6819	4.52643		33.6819	4.64684		33.6819	3.14851			3.14635	0.304255		33.6819
	33.8711	1.96566		33.8711	2.26118		33.8711	2.01131		33.8711	3.16153		33.8711	3.05017		33.8711	3.75142		33.8711	4.42766		33.8711	4.58603		33.8711	3.09465			3.09955	0.320124		33.8711
	34.0574	2.22547		34.0574	1.855		34.0574	2.03045		34.0574	3.35425		34.0574	3.52908		34.0574	3.94687		34.0574	4.41472		34.0574	5.34013		34.0574	3.1456			3.3216	0.347509		34.0574
	34.2409	2.30915		34.2409	2.21383		34.2409	2.09932		34.2409	3.15971		34.2409	3.4125		34.2409	3.69808		34.2409	5.18649		34.2409	5.2359		34.2409	3.23156			3.38694	0.363452		34.2409
	34.4216	2.42614		34.4216	1.9817		34.4216	1.99042		34.4216	3.69764		34.4216	3.73057		34.4216	4.03972		34.4216	5.34799		34.4216	5.23075		34.4216	3.28459			3.54937	0.374827		34.4216
	34.5995	2.46406		34.5995	2.00962		34.5995	2.09033		34.5995	3.70686		34.5995	3.54891		34.5995	4.19374		34.5995	5.38988		34.5995	5.51596		34.5995	3.40106			3.60425	0.389282		34.5995
	34.7747	2.38601		34.7747	2.17191		34.7747	2.04588		34.7747	3.55033		34.7747	3.66748		34.7747	4.30984		34.7747	5.69088		34.7747	5.53867		34.7747	3.53229			3.67165	0.407716		34.7747
	34.9472	2.59505		34.9472	2.75336		34.9472	2.20869		34.9472	3.44981		34.9472	3.94917		34.9472	4.57415		34.9472	5.96463		34.9472	6.08247		34.9472	3.53184			3.83285	0.429619		34.9472
	35.1171	2.64101		35.1171	2.73209		35.1171	2.24925		35.1171	3.72888		35.1171	3.6609		35.1171	4.84338		35.1171	5.79527		35.1171	6.21474		35.1171	3.58506			3.87931	0.431725		35.1171
	35.2843	2.81116		35.2843	2.09368		35.2843	2.39242		35.2843	4.07474		35.2843	3.96475		35.2843	4.72759		35.2843	6.32327		35.2843	6.31046		35.2843	3.73927			4.06341	0.453007		35.2843
	35.449	2.83461		35.449	2.43226		35.449	2.19817		35.449	3.86644		35.449	4.24033		35.449	4.86457		35.449	6.39419		35.449	8.11692		35.449	3.85868			4.29445	0.567616		35.449
	35.6112	2.89065		35.6112	3.00318		35.6112	2.48517		35.6112	4.1085		35.6112	4.24551		35.6112	5.14746		35.6112	6.20894		35.6112	8.11071		35.6112	3.74913			4.35322	0.543491		35.6112
	35.7709	3.07285		35.7709	2.99776		35.7709	2.52609		35.7709	3.98992		35.7709	4.38305		35.7709	5.19457		35.7709	6.5927		35.7709	7.80215		35.7709	4.06554			4.49336	0.547146		35.7709
	35.9282	3.06187		35.9282	2.54628		35.9282	2.66346		35.9282	4.11979		35.9282	4.47597		35.9282	5.95157		35.9282	7.1246		35.9282	8.33168		35.9282	4.02058			4.67937	0.593071		35.9282
	36.0831	3.19594		36.0831	2.8817		36.0831	2.61822		36.0831	4.28983		36.0831	4.43599		36.0831	6.27757		36.0831	7.28167		36.0831	8.48946		36.0831	4.24529			4.81243	0.611251		36.0831
	36.2356	3.2694		36.2356	3.23061		36.2356	2.62733		36.2356	4.24715		36.2356	4.52686		36.2356	6.53811		36.2356	7.99263		36.2356	8.44921		36.2356	4.46068			4.93376	0.643		36.2356
	36.3857	3.16255		36.3857	3.4654		36.3857	2.82912		36.3857	4.36348		36.3857	4.73534		36.3857	6.45622		36.3857	7.39091		36.3857	8.72291		36.3857	4.57469			4.95802	0.626874		36.3857
	36.5336	3.46338		36.5336	4.07507		36.5336	2.83168		36.5336	4.5961		36.5336	4.50144		36.5336	6.56134		36.5336	7.86882		36.5336	8.96407		36.5336	4.66927			5.08606	0.635348		36.5336
	36.6792	3.49612		36.6792	3.68076		36.6792	2.91017		36.6792	4.83686		36.6792	4.97829		36.6792	6.76598		36.6792	7.83275		36.6792	8.65978		36.6792	4.78506			5.26624	0.642391		36.6792
	36.8225	3.6178		36.8225	3.36968		36.8225	2.97631		36.8225	4.89434		36.8225	4.80608		36.8225	6.75272		36.8225	7.78621		36.8225	9.36433		36.8225	5.04048			5.34655	0.656013		36.8225
	36.9637	3.66127		36.9637	3.97977		36.9637	3.06359		36.9637	5.03042		36.9637	4.77333		36.9637	6.78914		36.9637	8.32812		36.9637	9.25457		36.9637	5.24602			5.46771	0.664213		36.9637
	37.1027	3.93298		37.1027	4.23624		37.1027	3.08665		37.1027	5.16783		37.1027	5.11519		37.1027	6.82964		37.1027	8.63663		37.1027	9.8843		37.1027	5.02774			5.66361	0.703759		37.1027
	37.2396	4.05279		37.2396	4.18265		37.2396	3.21213		37.2396	5.10266		37.2396	5.05049		37.2396	7.25154		37.2396	8.85418		37.2396	10.2001		37.2396	5.43298			5.81681	0.723364		37.2396
	37.3744	4.11009		37.3744	4.5424		37.3744	3.24111		37.3744	5.27578		37.3744	5.33851		37.3744	7.35388		37.3744	8.53965		37.3744	9.91283		37.3744	5.45697			5.82399	0.697356		37.3744
	37.5072	3.9545		37.5072	5.41898		37.5072	3.29113		37.5072	5.20281		37.5072	5.40416		37.5072	7.5463		37.5072	8.628		37.5072	10.4548		37.5072	5.5669			5.97066	0.754104		37.5072
	37.6379	4.15402		37.6379	6.06792		37.6379	3.46114		37.6379	5.3012		37.6379	5.62104		37.6379	7.39233					37.6379	10.9505		37.6379	5.59366			5.84036	0.78894		37.6379
	37.7666	4.38578		37.7666	6.15566		37.7666	3.36828		37.7666	5.09566		37.7666	5.62123		37.7666	7.65517					37.7666	11.031		37.7666	6.00304			5.92382	0.790999		37.7666
	37.8933	4.25952		37.8933	5.13061		37.8933	3.48414		37.8933	5.61095		37.8933	5.91381		37.8933	7.91564					37.8933	11.1558		37.8933	6.12483			6.04866	0.802808		37.8933
	38.0181	4.64855		38.0181	5.58658		38.0181	3.64028		38.0181	5.64804		38.0181	6.06049		38.0181	7.97254					38.0181	11.2533		38.0181	6.16714			6.21654	0.80469		38.0181
	38.141	4.48184		38.141	6.02804		38.141	3.58868		38.141	5.7957		38.141	6.04236		38.141	8.33818					38.141	11.692		38.141	6.19866			6.30223	0.848933		38.141
	38.262	4.68622		38.262	6.81412		38.262	3.72859		38.262	5.65804		38.262	6.08715		38.262	8.32337					38.262	11.1705		38.262	6.40177			6.35164	0.814806		38.262
	38.3811	4.81452		38.3811	6.83518		38.3811	3.81189		38.3811	5.75974		38.3811	6.3871		38.3811	8.50024					38.3811	11.7144		38.3811	6.59678			6.50419	0.83344		38.3811
	38.4985	4.91552		38.4985	5.42123		38.4985	3.97397		38.4985	6.03449					38.4985	8.92488					38.4985	11.8124		38.4985	6.68458			6.72278	0.950341		38.4985
	38.614	5.01255		38.614	5.92548		38.614	4.02739		38.614	6.20072					38.614	8.97036					38.614	11.8954		38.614	6.85721			6.82382	0.960262		38.614
	38.7278	5.10448		38.7278	7.4649		38.7278	4.05919								38.7278	9.11371					38.7278	12.3226		38.7278	7.10917			7.03217	1.11786		38.7278
	38.8398	5.33712		38.8398	6.64907		38.8398	4.14194								38.8398	9.21265					38.8398	12.2103		38.8398	7.53772			7.21307	1.10836		38.8398
	38.9501	5.45221		38.9501	6.12151		38.9501	4.33652								38.9501	9.5402					38.9501	12.4532		38.9501	7.50306			7.41004	1.14435		38.9501
	39.0587	5.55345		39.0587	6.49292		39.0587	4.25738								39.0587	9.48353					39.0587	12.7555		39.0587	7.63659			7.48181	1.1661		39.0587
	39.1657	5.58819		39.1657	7.57391		39.1657	4.28796								39.1657	9.64014					39.1657	13.1373		39.1657	7.94026			7.60594	1.19236		39.1657
	39.271	5.60032		39.271	7.16589		39.271	4.47984								39.271	9.91163					39.271	13.3224		39.271	7.98966			7.65867	1.19339		39.271
	39.3747	5.92558		39.3747	7.38995		39.3747	4.59405								39.3747	10.3547					39.3747	13.2013		39.3747	8.13045			7.90805	1.1996		39.3747
	39.4769	5.93945		39.4769	8.39568		39.4769	4.63829								39.4769	10.6021					39.4769	14.0459		39.4769	8.27819			8.12877	1.28087		39.4769
	39.5774	5.99862		39.5774	9.13676		39.5774	4.74029								39.5774	10.7381					39.5774	13.9622		39.5774	8.47745			8.18258	1.27294		39.5774
	39.6765	6.00931		39.6765	8.86035		39.6765	4.76915								39.6765	10.85					39.6765	14.4176		39.6765	8.63982			8.32279	1.32651		39.6765
	39.774	6.26488		39.774	8.3698		39.774	4.73815								39.774	11.9517					39.774	15.1306		39.774	8.71542			8.63798	1.40765		39.774
	39.87	6.44373		39.87	8.96608		39.87	4.78362								39.87	12.1013					39.87	14.8329		39.87	8.95907			8.70033	1.37918		39.87
	39.9645	6.6062		39.9645	8.85002		39.9645	4.85063								39.9645	12.2472					39.9645	14.7023		39.9645	9.43464			8.90497	1.38404		39.9645
				40.0576	10.2764		40.0576	4.925								40.0576	12.5942					40.0576	15.545		40.0576	9.54755			9.35256	2.18577		40.0576
				40.1493	9.3966		40.1493	4.95951								40.1493	12.47					40.1493	16.1631		40.1493	9.79577			9.69045	2.26102		40.1493
				40.2396	9.8262		40.2396	5.27749								40.2396	12.8768					40.2396	15.9171		40.2396	10.0927			9.69045	2.21071		40.2396
				40.3285	10.2383		40.3285	5.2908														40.3285	16.5707		40.3285	10.1069			10.6561	3.26779		40.3285
				40.416	10.5825		40.416	5.45737														40.416	16.6397		40.416	10.185			10.7607	3.24087		40.416
				40.5022	10.9543																	40.5022	16.9076		40.5022	10.4457
				40.5871	11.0774																	40.5871	17.6198		40.5871	10.6527
				40.6707	12.2323																				40.6707	10.5505
				40.753	11.7597																				40.753	10.8657
				40.834	13.5368																				40.834	11.043
				40.9138	14.4361																				40.9138	11.0309
				40.9924	13.4876																				40.9924	11.5107
				41.0698	14.4821																				41.0698	11.6249
				41.146	13.6147																				41.146	11.805
				41.221	15.5914																				41.221	11.9284
				41.2949	14.7208
				41.3677	16.5599
				41.4393	16.8838

## Sheet: untransfected
	Temperature	Current		Temperature	Current		Temperature	Current		Temperature	Current		Temperature	Current			MEAN	SEM	TEMPERATURE
	21.1986	0.999998		21.1986	1		21.1986	1		21.1986	1		21.1986	1			1	4e-07	21.1986
	23.8304	1.27468		23.8304	1.06664		23.8304	0.967391		23.8304	0.974723		23.8304	0.939662			1.04462	0.0613509	23.8304
	25.5561	0.887414		25.5561	1.06905		25.5561	0.99918		25.5561	0.925124		25.5561	0.802314			0.936616	0.0458492	25.5561
	26.7225	0.900676		26.7225	1.07547		26.7225	1.03652		26.7225	0.821161		26.7225	0.854655			0.937696	0.0502964	26.7225
	27.543	0.987325		27.543	1.10157		27.543	0.970579		27.543	0.891097		27.543	0.802802			0.950675	0.0499623	27.543
	28.1492	0.874741		28.1492	1.10759		28.1492	0.992513		28.1492	1.20765		28.1492	0.883679			1.01323	0.0644573	28.1492
	28.6218	0.935454		28.6218	1.15536		28.6218	1.07266		28.6218	0.944871		28.6218	0.788384			0.979346	0.0629563	28.6218
	29.0108	0.873562		29.0108	1.15135		29.0108	1.12629		29.0108	0.969421		29.0108	0.873203			0.998765	0.0599364	29.0108
	29.3468	1.1677		29.3468	1.32437		29.3468	1.17151		29.3468	1.02076		29.3468	0.992491			1.13537	0.0598424	29.3468
	29.6487	1.11052		29.6487	1.41991		29.6487	1.26117		29.6487	1.01652		29.6487	1.13487			1.1886	0.0697731	29.6487
	29.9281	1.28706		29.9281	1.60658		29.9281	1.39823		29.9281	1.21246		29.9281	1.12838			1.32654	0.0828861	29.9281
	30.1923	1.7262		30.1923	1.60699		30.1923	1.43993		30.1923	1.25789		30.1923	1.16472			1.43915	0.104579	30.1923
	30.4457	1.4244		30.4457	1.63147		30.4457	1.47428		30.4457	1.22091		30.4457	1.18515			1.38724	0.0827983	30.4457
	30.6911	1.55673		30.6911	1.67644		30.6911	1.48969		30.6911	1.25024		30.6911	1.12455			1.41953	0.101346	30.6911
	30.9302	1.63808		30.9302	1.84544		30.9302	1.50896		30.9302	1.28573		30.9302	1.27124			1.50989	0.10868	30.9302
	31.1641	1.62039		31.1641	1.7487		31.1641	1.48746		31.1641	1.34436		31.1641	1.35843			1.51187	0.0774804	31.1641
	31.3933	1.71235		31.3933	1.78924		31.3933	1.50742		31.3933	1.21921		31.3933	1.41283			1.52821	0.102779	31.3933
	31.6185	1.78956		31.6185	1.98515		31.6185	1.54665		31.6185	1.35481		31.6185	1.26223			1.58768	0.13427	31.6185
	31.8399	1.91747		31.8399	1.84946		31.8399	1.48771		31.8399	1.2925		31.8399	1.40953			1.59133	0.123711	31.8399
	32.0577	1.944		32.0577	1.86511		32.0577	1.47906		32.0577	1.35003		32.0577	1.2052			1.56868	0.144342	32.0577
	32.272	1.88476		32.272	2.03613		32.272	1.55699		32.272	1.17215		32.272	1.26111			1.58223	0.168741	32.272
	32.4829	2.47774		32.4829	1.96748		32.4829	1.58776		32.4829	1.27103		32.4829	1.30969			1.72274	0.226141	32.4829
	32.6906	2.56822		32.6906	1.97792		32.6906	1.58182		32.6906	1.42027		32.6906	1.52664			1.81497	0.21062	32.6906
	32.895	2.11789		32.895	2.17704		32.895	1.56443		32.895	1.54557		32.895	1.34547			1.75008	0.16697	32.895
	33.0963	2.27438		33.0963	2.17623		33.0963	1.51718		33.0963	1.51839		33.0963	1.38186			1.77361	0.186713	33.0963
	33.2945	2.4857		33.2945	2.10036		33.2945	1.51486		33.2945	1.42108		33.2945	1.34367			1.77313	0.222476	33.2945
	33.4897	2.48275		33.4897	2.10237		33.4897	1.52085		33.4897	1.36082		33.4897	1.33736			1.76083	0.227458	33.4897
	33.6819	2.32685		33.6819	2.28543		33.6819	1.56829		33.6819	1.37717		33.6819	1.65742			1.84303	0.19452	33.6819
	33.8711	2.41733		33.8711	2.15536		33.8711	1.57148		33.8711	1.45274		33.8711	1.56776			1.83293	0.19088	33.8711
	34.0574	2.50309		34.0574	2.18667		34.0574	1.55322		34.0574	1.39146		34.0574	1.34792			1.79647	0.231945	34.0574
	34.2409	2.40347		34.2409	2.34765		34.2409	1.63312		34.2409	1.69799		34.2409	1.4048			1.89741	0.201382	34.2409
	34.4216	2.54406		34.4216	2.30189		34.4216	1.67506		34.4216	1.48496		34.4216	1.49052			1.8993	0.21987	34.4216
	34.5995	2.62334		34.5995	2.32838		34.5995	1.68796		34.5995	1.3762		34.5995	1.7915			1.96148	0.225714	34.5995
	34.7747	2.67934		34.7747	2.33962		34.7747	1.74613		34.7747	1.65061		34.7747	1.77145			2.03743	0.201072	34.7747
	34.9472	2.76392		34.9472	2.33561		34.9472	1.77062		34.9472	1.50803		34.9472	1.50295			1.97623	0.248505	34.9472
	35.1171	2.87562		35.1171	2.43798		35.1171	1.80584		35.1171	1.59782		35.1171	1.43168			2.02979	0.271711	35.1171
	35.2843	2.87238		35.2843	2.42513		35.2843	1.86314					35.2843	1.47377			2.15861	0.307789	35.2843
	35.449	2.95638		35.449	2.611		35.449	1.81101					35.449	1.71186			2.27256	0.304078	35.449
	35.6112	3.02387		35.6112	2.61341		35.6112	1.88154					35.6112	1.69865			2.30437	0.310761	35.6112
	35.7709	3.27497		35.7709	2.63589		35.7709	1.83038					35.7709	1.8717			2.40324	0.34457	35.7709
	35.9282	3.39699		35.9282	2.69289		35.9282	1.85782					35.9282	1.71438			2.41552	0.391881	35.9282
	36.0831	3.42174		36.0831	2.64352		36.0831	1.86806					36.0831	1.70623			2.40989	0.394455	36.0831
	36.2356	3.33657		36.2356	2.72461		36.2356	1.84975					36.2356	1.81951			2.43261	0.367199	36.2356
	36.3857	3.54759		36.3857	2.65636		36.3857	1.87309					36.3857	1.72872			2.45144	0.418365	36.3857
	36.5336	3.77777		36.5336	2.69811		36.5336	1.90232					36.5336	1.52814			2.47659	0.497618	36.5336
	36.6792	4.00736		36.6792	2.74428		36.6792	1.87328					36.6792	1.92168			2.63665	0.498694	36.6792
	36.8225	3.89271		36.8225	2.96387		36.8225	1.89729					36.8225	1.71261			2.61662	0.506924	36.8225
	36.9637	3.9213		36.9637	2.94942		36.9637	1.92522					36.9637	1.80889			2.65121	0.494859	36.9637
	37.1027	3.74417		37.1027	2.89362		37.1027	1.9828					37.1027	1.84099			2.61539	0.442664	37.1027
	37.2396	3.97376		37.2396	2.98916		37.2396	1.95005					37.2396	1.76143			2.6686	0.511979	37.2396
	37.3744	4.18479		37.3744	2.90245		37.3744	1.92256					37.3744	1.92934			2.73479	0.535341	37.3744
	37.5072	4.34453		37.5072	2.98555		37.5072	1.94478					37.5072	1.60463			2.71987	0.616078	37.5072
	37.6379	4.29635		37.6379	2.85468		37.6379	1.94754					37.6379	1.91026			2.75221	0.55911	37.6379
	37.7666	4.48888		37.7666	2.98354		37.7666	1.96333					37.7666	2.08989			2.88141	0.581934	37.7666
	37.8933	4.56158		37.8933	2.95223		37.8933	2.02649					37.8933	2.07821			2.90463	0.591738	37.8933
	38.0181	4.76699		38.0181	2.96989		38.0181	1.97103					38.0181	1.91886			2.90669	0.665581	38.0181
	38.141	5.55024		38.141	2.84424		38.141	2.00881					38.141	1.66617			3.01736	0.879789	38.141
	38.262	5.55496		38.262	2.97029		38.262	2.02988					38.262	2.09943			3.16364	0.825316	38.262
	38.3811	5.29766		38.3811	2.94139		38.3811	2.10196					38.3811	1.86029			3.05032	0.784111	38.3811
	38.4985	5.49896		38.4985	2.94902								38.4985	2.20099			3.54966	0.998286	38.4985
	38.614	5.62116		38.614	2.94019								38.614	1.69636			3.41924	1.15803	38.614
	38.7278	5.98083		38.7278	3.03011								38.7278	1.83318			3.61471	1.23249	38.7278
	38.8398	5.70821		38.8398	3.00803								38.8398	1.90403			3.54009	1.12994	38.8398
	38.9501	5.69525		38.9501	3.11843								38.9501	1.90767			3.57378	1.11683	38.9501
	39.0587	5.8373		39.0587	3.20153								39.0587	1.63038			3.5564	1.22733	39.0587
													39.1657	1.63129
													39.271	1.88702
													39.3747	1.82672
													39.4769	1.86303
													39.5774	1.6742
													39.6765	1.89622
													39.774	1.73507
													39.87	1.85965
													39.9645	1.92378
													40.0576	1.86322
													40.1493	1.72748
													40.2396	1.86615
													40.3285	1.91856
													40.416	2.09248
													40.5022	1.95194
													40.5871	1.96448
													40.6707	1.95085
													40.753	2.0015
													40.834	1.9697
													40.9138	1.8678
													40.9924	1.97255
													41.0698	1.88293
													41.146	2.00811
													41.221	1.82954
													41.2949	2.15072
													41.3677	2.24973
													41.4393	2.25262
													41.5098	2.17869
													41.5793	2.24459
													41.6477	2.36534
													41.7151	2.10273
													41.7814	2.20411
													41.8467	2.20437
													41.911	2.17738
													41.9743	2.2655
													42.0367	2.27643

## Sheet: rTRPV2
	Temperature	Current		Temperature	Current		Temperature	Current		Temperature	Current		Temperature	Current		Temperature	Current		Temperature	Current		Temperature	Current		Temperature	Current			MEAN	SEM	TEMPERATURE
	20.8486	1		20.8486	1		20.8486	0.999999		20.8486	0.999998		20.8486	1		20.8486	0.999998		20.8486	1		20.8486	0.999999		20.8486	1			0.999999	2.88675e-07	20.8486
	23.4804	0.884827		23.4804	0.94723		23.4804	1.06834		23.4804	1.02328		23.4804	0.991151		23.4804	0.981253		23.4804	0.897752		23.4804	1.0282		23.4804	1.03855			0.984509	0.0211699	23.4804
	25.2061	0.886699		25.2061	0.971363		25.2061	0.825703		25.2061	1.07848		25.2061	0.977434		25.2061	0.956778		25.2061	1.14899		25.2061	1.04977		25.2061	1.00132			0.988504	0.0325023	25.2061
	26.3725	0.917271		26.3725	0.943932		26.3725	1.10445		26.3725	1.14138		26.3725	0.80531		26.3725	1.01247		26.3725	1.04799		26.3725	1.00294		26.3725	1.0524			1.00313	0.0341392	26.3725
	27.193	0.755054		27.193	0.939025		27.193	1.18547		27.193	1.09201		27.193	0.913275		27.193	0.979366		27.193	1.11385		27.193	1.05405		27.193	1.00171			1.00376	0.0425388	27.193
	27.7992	0.909534		27.7992	0.953907		27.7992	0.932301		27.7992	1.03962		27.7992	1.09336		27.7992	0.971713		27.7992	1.05867		27.7992	1.08107		27.7992	0.978658			1.00209	0.0224872	27.7992
	28.2718	0.835289		28.2718	0.943932		28.2718	1.01526		28.2718	1.12781		28.2718	0.893806		28.2718	0.999324		28.2718	1.05426		28.2718	1.05657		28.2718	1.09321			1.00216	0.0318219	28.2718
	28.6608	0.786624		28.6608	0.90379		28.6608	1.02729		28.6608	1.12534		28.6608	0.896018		28.6608	1.09025		28.6608	1.14009		28.6608	1.11498		28.6608	0.994848			1.0088	0.0412264	28.6608
	28.9968	1.01909		28.9968	0.98536		28.9968	1.11476		28.9968	1.32119		28.9968	1.04071		28.9968	1.24961		28.9968	1.26633		28.9968	1.16223		28.9968	1.09387			1.13924	0.0395195	28.9968
	29.2987	0.989519		29.2987	1.03137		29.2987	1.31227		29.2987	1.23389		29.2987	1.31549		29.2987	1.23289		29.2987	1.41275		29.2987	1.23391		29.2987	1.14001			1.21134	0.0456076	29.2987
	29.5781	1.10706		29.5781	1.10498		29.5781	1.4208		29.5781	1.40728		29.5781	1.40664		29.5781	1.35695		29.5781	1.42607		29.5781	1.26655		29.5781	1.33002			1.31404	0.0428362	29.5781
	29.8423	1.09733		29.8423	1.20232		29.8423	1.38147		29.8423	1.51862		29.8423	1.49867		29.8423	1.41767		29.8423	1.36555		29.8423	1.3984		29.8423	1.1734			1.33927	0.0492291	29.8423
	30.0957	1.07762		30.0957	1.10088		30.0957	1.06985		30.0957	1.55508		30.0957	1.82788		30.0957	1.43176		30.0957	1.4916		30.0957	1.37465		30.0957	1.14809			1.34193	0.087614	30.0957
	30.3411	1.32581		30.3411	1.06806		30.3411	1.53127		30.3411	1.4055		30.3411	2.04292		30.3411	1.55094		30.3411	1.44776		30.3411	1.49039		30.3411	1.16675			1.44771	0.0923045	30.3411
	30.5802	1.37472		30.5802	1.05551		30.5802	1.19686		30.5802	1.50308		30.5802	2.19248		30.5802	1.41484		30.5802	1.53372		30.5802	1.42669		30.5802	1.2069			1.43387	0.108334	30.5802
	30.8141	1.25643		30.8141	1.07924		30.8141	1.67763		30.8141	1.67307		30.8141	2.23982		30.8141	1.332		30.8141	1.56616		30.8141	1.46286		30.8141	1.2149			1.50023	0.115498	30.8141
	31.0433	1.10669		31.0433	1.06757		31.0433	1.62562		31.0433	1.75093		31.0433	2.06195		31.0433	1.53759		31.0433	1.45092		31.0433	1.53202		31.0433	1.19039			1.48041	0.107592	31.0433
	31.2685	1.25543		31.2685	1.10506		31.2685	1.63099		31.2685	1.71622		31.2685	2.09735		31.2685	1.53182		31.2685	1.42851		31.2685	1.51523		31.2685	1.25888			1.50439	0.0986611	31.2685
	31.4899	1.29274		31.4899	1.11866		31.4899	2.2407		31.4899	1.77065		31.4899	1.97655		31.4899	1.51149		31.4899	1.44446		31.4899	1.54335		31.4899	1.24004			1.57096	0.121605	31.4899
	31.7077	1.4033		31.7077	1.12493		31.7077	1.39953		31.7077	1.74711		31.7077	2.17744		31.7077	1.50819		31.7077	1.36212		31.7077	1.52279		31.7077	1.28879			1.5038	0.101666	31.7077
	31.922	1.35363		31.922	1.21712		31.922	1.68257		31.922	1.69652		31.922	1.99602		31.922	1.5832		31.922	1.44479		31.922	1.55753		31.922	1.15857			1.52111	0.0870248	31.922
	32.1329	1.57662		32.1329	1.2209		32.1329	1.61745		32.1329	1.72534		32.1329	2.02743		32.1329	1.47562		32.1329	1.41262		32.1329	1.63038		32.1329	1.16194			1.5387	0.0876036	32.1329
	32.3406	1.31458		32.3406	1.26539		32.3406	1.83817		32.3406	1.90215		32.3406	1.90089		32.3406	1.51615		32.3406	1.32448		32.3406	1.77113		32.3406	1.19555			1.55872	0.0980685	32.3406
	32.545	1.4577		32.545	1.28333		32.545	1.91446		32.545	1.95165		32.545	2.13363		32.545	1.59537		32.545	1.44663		32.545	1.59614		32.545	1.28036			1.62881	0.101796	32.545
	32.7463	1.3273		32.7463	1.28815		32.7463	1.93574		32.7463	1.93785		32.7463	2.16637		32.7463	1.69388		32.7463	1.58409		32.7463	1.57835		32.7463	1.22768			1.63771	0.108948	32.7463
	32.9445	1.64699		32.9445	1.2752		32.9445	1.77821		32.9445	1.86675		32.9445	2.17522		32.9445	1.73899		32.9445	1.44921		32.9445	1.60075		32.9445	1.21936			1.63896	0.0996365	32.9445
	33.1397	1.59434		33.1397	1.31872		33.1397	2.11261		33.1397	2.05951		33.1397	2.06991		33.1397	1.67254		33.1397	1.41901		33.1397	1.57977		33.1397	1.23879			1.67391	0.111406	33.1397
	33.3319	1.67133		33.3319	1.4241		33.3319	2.27423		33.3319	2.03099		33.3319	2.25841		33.3319	1.6366		33.3319	1.51671		33.3319	1.56357		33.3319	1.24001			1.73511	0.122746	33.3319
	33.5211	1.76154		33.5211	1.4027		33.5211	2.39071		33.5211	2.19245		33.5211	2.07699		33.5211	1.85082		33.5211	1.52515		33.5211	1.58623		33.5211	1.22479			1.77904	0.128546	33.5211
	33.7074	1.62154		33.7074	1.38469		33.7074	2.18332		33.7074	2.20046		33.7074	2.31859		33.7074	1.76896		33.7074	1.63241		33.7074	1.61385		33.7074	1.23242			1.77292	0.126919	33.7074
	33.8909	1.90716		33.8909	1.46867		33.8909	2.30776		33.8909	1.96473		33.8909	2.31283		33.8909	1.76788		33.8909	1.568		33.8909	1.59555		33.8909	1.30052			1.79923	0.118752	33.8909
	34.0716	1.77415		34.0716	1.54606		34.0716	2.29336		34.0716	2.19674		34.0716	2.33761		34.0716	1.96527		34.0716	1.61098		34.0716	1.59463		34.0716	1.34826			1.8519	0.120187	34.0716
	34.2495	1.62715		34.2495	1.49892		34.2495	2.21298		34.2495	2.27798		34.2495	2.36637		34.2495	1.94059		34.2495	1.59167		34.2495	1.63013		34.2495	1.31247			1.8287	0.127073	34.2495
	34.4247	1.85975		34.4247	1.48966		34.4247	2.46336		34.4247	2.58778		34.4247	2.41991		34.4247	1.9498		34.4247	1.55093		34.4247	1.70659		34.4247	1.24662			1.91938	0.158814	34.4247
	34.5972	1.95982		34.5972	1.52426		34.5972	2.4625		34.5972	2.56265		34.5972	2.43407		34.5972	1.96918		34.5972	1.51473		34.5972	1.67335		34.5972	1.29798			1.93317	0.155573	34.5972
	34.7671	1.90093		34.7671	1.5463		34.7671	2.43649		34.7671	2.6024		34.7671	2.3385		34.7671	2.0004		34.7671	1.60947		34.7671	1.68963		34.7671	1.28475			1.93432	0.149316	34.7671
	34.9343	1.8993		34.9343	1.50889		34.9343	2.67591		34.9343	2.32455		34.9343	2.38097		34.9343	2.1273		34.9343	1.54743		34.9343	1.66647		34.9343	1.47215			1.95589	0.14682	34.9343
	35.099	1.92738		35.099	1.48878		35.099	2.5923		35.099	2.7778		35.099	2.54867		35.099	2.24266		35.099	1.77355		35.099	1.70281		35.099	1.50815			2.06246	0.163671	35.099
	35.2612	2.01385		35.2612	1.54075		35.2612	2.6701		35.2612	2.87287		35.2612	2.42257		35.2612	2.34896		35.2612	1.70466		35.2612	1.70726		35.2612	1.42347			2.07828	0.173707	35.2612
	35.4209	1.97505		35.4209	1.56697		35.4209	2.63378		35.4209	3.01271		35.4209	2.61859		35.4209	2.28268		35.4209	1.60479		35.4209	1.77499		35.4209	1.36006			2.09218	0.19068	35.4209
	35.5782	2.09945		35.5782	1.56094		35.5782	2.93595		35.5782	2.72082		35.5782	2.79027		35.5782	2.26137		35.5782	1.80493		35.5782	1.70634		35.5782	1.54805			2.15868	0.182309	35.5782
	35.7331	2.142		35.7331	1.60671		35.7331	2.68708		35.7331	2.80233		35.7331	2.84336		35.7331	2.40074		35.7331	1.80922		35.7331	1.71305		35.7331	1.48893			2.16594	0.178521	35.7331
	35.8856	2.25044		35.8856	1.62449		35.8856	2.64238		35.8856	2.86148		35.8856	2.77124		35.8856	2.57652		35.8856	1.86894		35.8856	1.66748		35.8856	1.57013			2.20368	0.175787	35.8856
	36.0357	1.97317		36.0357	1.59296		36.0357	2.77842		36.0357	3.13051		36.0357	2.85221		36.0357	2.52471		36.0357	2.00626		36.0357	1.6919		36.0357	1.37507			2.21391	0.208355	36.0357
	36.1836	2.22324		36.1836	1.60856		36.1836	2.97958		36.1836	3.06757		36.1836	2.74248		36.1836	2.52282		36.1836	1.8665		36.1836	1.68216		36.1836	1.52135			2.24603	0.201733	36.1836
	36.3292	2.54867		36.3292	1.7318		36.3292	2.7191		36.3292	3.19308		36.3292	2.89027		36.3292	2.51935		36.3292	1.97739		36.3292	1.68225		36.3292	1.4484			2.30115	0.202942	36.3292
	36.4725	2.52384		36.4725	1.73003		36.4725	2.7176		36.4725	3.21169		36.4725	2.94292		36.4725	2.57605		36.4725	2.02545		36.4725	1.71599		36.4725	1.59185			2.33727	0.196338	36.4725
	36.6137	2.59047		36.6137	1.64919		36.6137	2.77821		36.6137	3.15323		36.6137	2.9323		36.6137	2.64671		36.6137	2.02822		36.6137	1.73277		36.6137	1.57291			2.34267	0.200434	36.6137
	36.7527	2.64275		36.7527	1.64396		36.7527	3.25209		36.7527	3.04564		36.7527	2.79735		36.7527	2.66141		36.7527	1.83315		36.7527	1.80453		36.7527	1.46567			2.34962	0.221287	36.7527
	36.8896	2.56963		36.8896	1.66704		36.8896	3.06985		36.8896	3.12254		36.8896	3.04912		36.8896	2.76387		36.8896	1.99723		36.8896	1.78414		36.8896	1.44652			2.38555	0.221713	36.8896
	37.0244	2.57737		37.0244	1.66294		37.0244	2.951		37.0244	3.24722		37.0244	3.1062		37.0244	2.7518		37.0244	2.07502		37.0244	1.82232		37.0244	1.62737			2.42458	0.21244	37.0244
	37.1572	2.66471		37.1572	1.64573		37.1572	3.01031		37.1572	3.3612		37.1572	3.25752		37.1572	2.84899		37.1572	2.13969		37.1572	1.79698		37.1572	1.4883			2.46816	0.238429	37.1572
	37.2879	2.64512		37.2879	1.65739		37.2879	3.07027		37.2879	3.57813		37.2879	3.29336		37.2879	2.83045		37.2879	1.84013		37.2879	2.02996		37.2879	1.65167			2.51072	0.245296	37.2879
	37.4166	2.74308		37.4166	1.6228		37.4166	3.05136		37.4166	3.47195		37.4166	3.40177		37.4166	2.89865		37.4166	2.01272		37.4166	1.90667		37.4166	1.42866			2.50418	0.257834	37.4166
	37.5433	2.87959		37.5433	1.6343		37.5433	2.90501		37.5433	3.58863		37.5433	3.41195		37.5433	2.88999		37.5433	2.17846		37.5433	1.85396		37.5433	1.52361			2.54061	0.255105	37.5433
	37.6681	2.89556		37.6681	1.66069		37.6681	3.25145		37.6681	3.5997		37.6681	3.41062		37.6681	2.941		37.6681	2.3047		37.6681	1.86504		37.6681	1.53604			2.6072	0.261559	37.6681
	37.791	2.66309		37.791	1.62336		37.791	3.4208		37.791	3.80661		37.791	3.47921		37.791	2.92057		37.791	2.10864		37.791	1.87948		37.791	1.48879			2.59895	0.287677	37.791
	37.912	2.94048		37.912	1.71547		37.912	3.45476		37.912	3.78662		37.912	3.54867		37.912	3.02599		37.912	2.34109		37.912	1.97465		37.912	1.58827			2.70844	0.276242	37.912
	38.0311	2.76292		38.0311	1.6993		38.0311	3.28497		38.0311	3.80315		38.0311	3.59337		38.0311	3.09601		38.0311	2.12117		38.0311	1.92119		38.0311	1.49548			2.64195	0.285812	38.0311
	38.1485	2.87322		38.1485	1.69118		38.1485	3.28691		38.1485	3.89563		38.1485	3.35089		38.1485	3.20436		38.1485	2.29112		38.1485	1.91422		38.1485	1.58124			2.67653	0.277165	38.1485
	38.264	2.94984		38.264	1.84547		38.264	3.1139		38.264	4.10254		38.264	3.74823		38.264	3.14159		38.264	2.39891		38.264	1.94276		38.264	1.61041			2.76152	0.289686	38.264
	38.3778	2.73709		38.3778	1.77202		38.3778	3.50677					38.3778	3.59115		38.3778	3.21077		38.3778	2.6212		38.3778	1.94058		38.3778	1.59468			2.62178	0.277879	38.3778
	38.4898	3.05166		38.4898	1.65321		38.4898	3.30432					38.4898	4.45487		38.4898	3.24539		38.4898	2.59266									3.05035	0.375797	38.4898
	38.6001	3.00325		38.6001	1.61862		38.6001	3.30023					38.6001	4.0531		38.6001	3.25746		38.6001	2.73024									2.99382	0.328948	38.6001
	38.7087	3.20477		38.7087	1.66841		38.7087	3.57919					38.7087	3.82567		38.7087	3.33315		38.7087	2.78285									3.06567	0.314352	38.7087
	38.8157	3.32319		38.8157	1.63342		38.8157	3.36664					38.8157	3.82257		38.8157	3.38321		38.8157	2.73525									3.04405	0.315613	38.8157
	38.921	3.22012		38.921	1.88038		38.921	3.11068					38.921	4.10929		38.921	3.68437		38.921	2.79597									3.13347	0.313469	38.921
	39.0247	3.25256		39.0247	1.89108		39.0247	3.70169					39.0247	4.0323		39.0247	3.65268		39.0247	2.84923									3.22992	0.315332	39.0247
	39.1269	3.358		39.1269	1.86848		39.1269	3.66215					39.1269	4.33098		39.1269	3.7641		39.1269	2.98003									3.32729	0.34448	39.1269
	39.2274	3.43262		39.2274	1.92736		39.2274	3.58156					39.2274	3.92567		39.2274	3.8054												3.33452	0.362073	39.2274
				39.3265	1.97209		39.3265	3.55899					39.3265	4.60576		39.3265	3.85401												3.49771	0.554226	39.3265
							39.424	3.99892					39.424	4.34691		39.424	3.77277												4.03953	0.166979	39.424
							39.52	3.26929					39.52	3.88717		39.52	3.80382												3.65343	0.19357	39.52
							39.6145	3.8199					39.6145	3.97744		39.6145	3.82526												3.8742	0.0516432	39.6145
							39.7076	3.54545					39.7076	3.87699		39.7076	3.89083												3.77109	0.112891	39.7076
							39.7993	3.37674					39.7993	3.84071		39.7993	3.93125												3.71623	0.171747	39.7993
							39.8896	3.59058					39.8896	4.45797		39.8896	4.05376												4.0341	0.250587	39.8896
							39.9785	3.57726					39.9785	4.28761		39.9785	4.1517												4.00552	0.217696	39.9785
							40.066	3.98044					40.066	4.47301		40.066	4.23841												4.23062	0.142246	40.066
							40.1522	3.65721					40.1522	4.13319		40.1522	4.48374												4.09138	0.239513	40.1522
							40.2371	3.73888
							40.3207	3.60348
							40.403	4.12056
							40.484	3.86525
							40.5638	4.58886
							40.6424	3.51085
							40.7198	4.07371
							40.796	3.84483
							40.871	4.16075
							40.9449	4.18246
							41.0177	4.16785
							41.0893	4.04362
							41.1598	3.67397
							41.2293	3.92155
							41.2977	4.16097
							41.3651	4.32903
							41.4314	3.83494
							41.4967	4.66387
							41.561	4.07844
							41.6243	4.66

## Sheet: rTRPV2 + CBD
	Temperature	Current		Temperature	Current		Temperature	Current		Temperature	Current		Temperature	Current		Temperature	Current		Temperature	Current		Temperature	Current		Temperature	Current			MEAN	SEM	TEMPERATURE
	21.1986	1		21.1986	1		21.1986	1		21.1986	1		21.1986	0.999999		21.1986	0.999999		21.1986	1		21.1986	1		21.1986	1			1	1.11111e-07	21.1986
	23.8304	0.887544		23.8304	0.974087		23.8304	1.11279		23.8304	0.950236		23.8304	0.946916		23.8304	0.901471		23.8304	0.775975		23.8304	0.773176		23.8304	0.904403			0.914435	0.034477	23.8304
	25.5561	0.992558		25.5561	0.8896		25.5561	0.900472		25.5561	0.988901		25.5561	0.948015		25.5561	0.947946		25.5561	0.850546		25.5561	0.950055		25.5561	1.22449			0.970385	0.0358312	25.5561
	26.7225	0.942838		26.7225	1.05126		26.7225	0.693845		26.7225	1.21068		26.7225	1.3152		26.7225	0.957156		26.7225	0.976911		26.7225	0.89522		26.7225	1.19239			1.01455	0.0573553	26.7225
	27.543	1.17489		27.543	0.99147		27.543	1.01496		27.543	0.887582		27.543	0.875237		27.543	0.898223		27.543	0.755694		27.543	0.801978		27.543	1.03439			0.93853	0.0429132	27.543
	28.1492	1.32188		28.1492	0.928792		28.1492	0.916939		28.1492	1.03144		28.1492	1.0313		28.1492	0.942905		28.1492	1.08159		28.1492	0.819186		28.1492	1.29695			1.04124	0.0568917	28.1492
	28.6218	1.35352		28.6218	1.16965		28.6218	1.11021		28.6218	0.817776		28.6218	0.88201		28.6218	0.983649		28.6218	0.877691		28.6218	0.81148		28.6218	1.30975			1.02794	0.0718794	28.6218
	29.0108	1.43127		29.0108	1.13296		29.0108	1.19678		29.0108	1.02622		29.0108	0.807756		29.0108	0.904567		29.0108	1.02512		29.0108	0.782326		29.0108	1.37426			1.09997	0.0698228	29.0108
	29.3468	1.37929		29.3468	1.27588		29.3468	1.10828		29.3468	1.0181		29.3468	0.889323		29.3468	1.02948		29.3468	1.03588		29.3468	0.863963		29.3468	1.07383			1.0892	0.050943	29.3468
	29.6487	1.45525		29.6487	1.34795		29.6487	1.19259		29.6487	1.20338		29.6487	0.762561		29.6487	1.0426		29.6487	1.25803		29.6487	1.0002		29.6487	1.30439			1.22309	0.047329	29.6487
	29.9281	1.67044		29.9281	1.21648		29.9281	1.22407		29.9281	1.18342		29.9281	1.03025		29.9281	1.14879		29.9281	1.2326		29.9281	0.930486		29.9281	1.23394			1.22485	0.0639696	29.9281
	30.1923	1.34539		30.1923	1.50329		30.1923	1.41879		30.1923	1.42383		30.1923	0.988831		30.1923	1.16247		30.1923	1.23058		30.1923	1.07194		30.1923	1.1248			1.30055	0.0519887	30.1923
	30.4457	1.32707		30.4457	1.41905		30.4457	1.60008		30.4457	0.846682		30.4457	0.963626		30.4457	1.17082		30.4457	1.27909		30.4457	1.1616		30.4457	1.2021			1.20591	0.0818308	30.4457
	30.6911	1.33038		30.6911	1.29515		30.6911	1.32538		30.6911	1.58892		30.6911	1.05671		30.6911	1.19975		30.6911	1.54368		30.6911	1.28898		30.6911	1.11908			1.36447	0.0569375	30.6911
	30.9302	1.32637		30.9302	1.52449		30.9302	1.30357		30.9302	1.66982		30.9302	1.07269		30.9302	1.18196		30.9302	1.58986		30.9302	1.18331		30.9302	1.45513			1.43381	0.0644544	30.9302
	31.1641	1.30875		31.1641	1.30454		31.1641	1.33398		31.1641	1.18714		31.1641	0.989061		31.1641	1.23335		31.1641	1.52574		31.1641	1.09009		31.1641	1.51379			1.29828	0.0488577	31.1641
	31.3933	1.21687		31.3933	1.34202		31.3933	1.53058		31.3933	1.24272		31.3933	0.950474		31.3933	1.24578		31.3933	1.6493		31.3933	1.11431		31.3933	1.39277			1.33079	0.0562624	31.3933
	31.6185	1.29172		31.6185	1.37147		31.6185	1.67485		31.6185	1.42502		31.6185	1.09393		31.6185	1.26308		31.6185	1.55398		31.6185	1.31483		31.6185	1.43512			1.41723	0.043717	31.6185
	31.8399	1.52113		31.8399	1.30279		31.8399	1.99504		31.8399	1.25039		31.8399	1.15612		31.8399	1.35393		31.8399	1.18206		31.8399	1.35034		31.8399	1.26331			1.38549	0.0826502	31.8399
	32.0577	1.3123		32.0577	1.34013		32.0577	1.5089		32.0577	1.20085		32.0577	1.16105		32.0577	1.35762		32.0577	1.78471		32.0577	1.33973		32.0577	1.45192			1.38856	0.0597917	32.0577
	32.272	1.36681		32.272	1.37029		32.272	1.44576		32.272	1.53178		32.272	1.1378		32.272	1.33988		32.272	1.42496		32.272	1.57392		32.272	1.39726			1.44249	0.0281494	32.272
	32.4829	1.5057		32.4829	1.6698		32.4829	1.71274		32.4829	1.29137		32.4829	0.984879		32.4829	1.32591		32.4829	1.80172		32.4829	1.53357		32.4829	1.46911			1.51125	0.062745	32.4829
	32.6906	1.32502		32.6906	1.5393		32.6906	1.76317		32.6906	1.20413		32.6906	1.12525		32.6906	1.29307		32.6906	1.55632		32.6906	1.50491		32.6906	1.66246			1.45028	0.0673567	32.6906
	32.895	1.70762		32.895	1.58542		32.895	1.83014		32.895	1.42286		32.895	1.20421		32.895	1.33072		32.895	1.82137		32.895	1.69148		32.895	1.62618			1.60429	0.0598517	32.895
	33.0963	1.45462		33.0963	1.47991		33.0963	1.78199		33.0963	1.86777		33.0963	1.10636		33.0963	1.28947		33.0963	1.56147		33.0963	1.73101		33.0963	1.47531			1.61215	0.0688573	33.0963
	33.2945	1.47656		33.2945	1.56928		33.2945	1.9691		33.2945	1.61343		33.2945	1.16251		33.2945	1.23017		33.2945	1.79048		33.2945	1.72003		33.2945	1.4655			1.60533	0.0705214	33.2945
	33.4897	1.5119		33.4897	1.55565		33.4897	1.84546		33.4897	1.80265		33.4897	1.27158		33.4897	1.23415		33.4897	2.03947		33.4897	1.76605		33.4897	1.55662			1.6794	0.0792156	33.4897
	33.6819	1.4796		33.6819	1.65234		33.6819	2.18437		33.6819	1.41973		33.6819	1.36528		33.6819	1.23066		33.6819	1.85023		33.6819	1.68743		33.6819	1.57817			1.61136	0.0935195	33.6819
	33.8711	1.48403		33.8711	1.78166		33.8711	2.06963		33.8711	1.8887		33.8711	1.2241		33.8711	1.26277		33.8711	1.91732		33.8711	1.82988		33.8711	1.61502			1.74863	0.0835293	33.8711
	34.0574	1.43326		34.0574	1.62133		34.0574	2.11121		34.0574	1.81673		34.0574	1.35735		34.0574	1.24071		34.0574	2.13962		34.0574	1.76598		34.0574	1.47377			1.71326	0.100819	34.0574
	34.2409	1.71003		34.2409	1.73087		34.2409	2.43782		34.2409	1.75751		34.2409	1.33988		34.2409	1.23829		34.2409	1.93806		34.2409	1.66834		34.2409	1.48076			1.74658	0.108745	34.2409
	34.4216	1.608		34.4216	1.64253		34.4216	2.42689		34.4216	1.73575		34.4216	1.45821		34.4216	1.17163		34.4216	2.22605		34.4216	1.7474		34.4216	1.65424			1.77203	0.12112	34.4216
	34.5995	1.78446		34.5995	1.9118		34.5995	2.37493		34.5995	1.72182		34.5995	1.56566		34.5995	1.19753		34.5995	2.01482		34.5995	1.88337		34.5995	1.72671			1.81525	0.10374	34.5995
	34.7747	1.81872		34.7747	1.9088		34.7747	2.4302		34.7747	1.48782		34.7747	1.43873		34.7747	1.17267		34.7747	2.17925		34.7747	1.83484		34.7747	1.61497			1.77057	0.127436	34.7747
	34.9472	1.92295		34.9472	1.94714		34.9472	2.33964		34.9472	1.76347		34.9472	1.51902		34.9472	1.18401		34.9472	2.21435		34.9472	1.83729		34.9472	1.86395			1.8707	0.108158	34.9472
	35.1171	1.75716		35.1171	1.99815		35.1171	2.4591		35.1171	1.95225		35.1171	1.33055		35.1171	1.19227		35.1171	2.00187		35.1171	1.90312		35.1171	1.74333			1.88439	0.110662	35.1171
	35.2843	2.24737		35.2843	2.1184		35.2843	2.58341		35.2843	1.7438		35.2843	1.34911		35.2843	1.31522		35.2843	2.2103		35.2843	1.94933		35.2843	1.63735			1.94989	0.127556	35.2843
	35.449	2.27575		35.449	2.04837		35.449	2.84576		35.449	1.70141		35.449	1.30461		35.449	1.21268		35.449	2.49142		35.449	1.9731		35.449	1.61691			1.9852	0.165784	35.449
	35.6112	2.09652		35.6112	2.23465		35.6112	3.02887		35.6112	1.95433		35.6112	1.32902		35.6112	1.25871		35.6112	2.23385		35.6112	1.95548		35.6112	1.78792			2.05607	0.155902	35.6112
	35.7709	2.15766		35.7709	2.10876		35.7709	2.9525		35.7709	1.89615		35.7709	1.38717		35.7709	1.26052		35.7709	2.42293		35.7709	1.94339		35.7709	1.79566			2.04819	0.154348	35.7709
	35.9282	2.27828		35.9282	2.21517		35.9282	3.24718		35.9282	2.02876		35.9282	1.41035		35.9282	1.29743		35.9282	2.17317		35.9282	1.9017		35.9282	1.88026			2.11675	0.171017	35.9282
	36.0831	2.16724		36.0831	2.19718		36.0831	3.42168		36.0831	1.82016		36.0831	1.41364		36.0831	1.3096		36.0831	2.79922		36.0831	2.00032		36.0831	1.92841			2.16266	0.205315	36.0831
	36.2356	2.30769		36.2356	2.29519		36.2356	3.30646		36.2356	2.18059		36.2356	1.46284		36.2356	1.28556		36.2356	2.5649		36.2356	1.98839		36.2356	1.84091			2.2167	0.18205	36.2356
	36.3857	2.2314		36.3857	2.30461		36.3857	3.35207		36.3857	2.20115		36.3857	1.34419		36.3857	1.28842		36.3857	2.2298		36.3857	2.05741		36.3857	1.89275			2.19542	0.17817	36.3857
	36.5336	2.38869		36.5336	2.19707		36.5336	3.47013		36.5336	2.27118		36.5336	1.33445		36.5336	1.31889		36.5336	2.50593		36.5336	2.11586		36.5336	1.97885			2.27975	0.187367	36.5336
	36.6792	2.39249		36.6792	2.16801		36.6792	3.31034		36.6792	2.02988		36.6792	1.45687		36.6792	1.22617		36.6792	2.3546		36.6792	2.06571		36.6792	1.97529			2.17249	0.181153	36.6792
	36.8225	2.35012		36.8225	2.27545		36.8225	3.21796		36.8225	2.29211		36.8225	1.42465		36.8225	1.27042		36.8225	2.75086		36.8225	2.14154		36.8225	2.09767			2.29869	0.173815	36.8225
	36.9637	2.23531		36.9637	2.30975		36.9637	3.38065		36.9637	2.26939		36.9637	1.6236		36.9637	1.3743		36.9637	2.55632		36.9637	2.12522		36.9637	2.1598			2.29779	0.172673	36.9637
	37.1027	2.35922		37.1027	2.66737		37.1027	3.84014		37.1027	2.32489		37.1027	1.65853		37.1027	1.31614		37.1027	2.88159		37.1027	2.10912		37.1027	2.07348			2.43298	0.228113	37.1027
	37.2396	2.65272		37.2396	2.41245		37.2396	3.68791		37.2396	2.44566		37.2396	1.75274		37.2396	1.43041		37.2396	2.41747		37.2396	2.11458		37.2396	2.11684			2.41374	0.19816	37.2396
	37.3744	2.94414		37.3744	2.68222		37.3744	3.56815		37.3744	2.08508		37.3744	1.56717		37.3744	1.43663		37.3744	2.47114		37.3744	2.14034		37.3744	2.31705			2.41443	0.202218	37.3744
	37.5072	2.78774		37.5072	2.51096		37.5072	3.55622		37.5072	2.46152		37.5072	1.77812		37.5072	1.447		37.5072	3.00983		37.5072	2.10349		37.5072	2.25408			2.51026	0.196743	37.5072
	37.6379	2.77159		37.6379	2.81761		37.6379	3.69467		37.6379	2.38777		37.6379	1.70966		37.6379	1.47471		37.6379	3.33089		37.6379	2.26096		37.6379	2.13109			2.58412	0.220423	37.6379
	37.7666	2.81914		37.7666	3.067		37.7666	3.74102		37.7666	2.73754		37.7666	1.67094		37.7666	1.48769		37.7666	2.88845		37.7666	2.22256		37.7666	2.498			2.68877	0.204405	37.7666
	37.8933	3.03788		37.8933	2.87515		37.8933	4.00609		37.8933	2.47844		37.8933	1.68899		37.8933	1.40364		37.8933	3.19282		37.8933	2.291		37.8933	2.4823			2.69397	0.238242	37.8933
	38.0181	2.83575		38.0181	3.10152		38.0181	4.22986		38.0181	2.18618		38.0181	1.82684		38.0181	1.51407		38.0181	2.75179		38.0181	2.35421		38.0181	2.49374			2.62814	0.252017	38.0181
	38.141	2.81993		38.141	3.13728		38.141	4.24813		38.141	2.42688		38.141	1.78798		38.141	1.46527		38.141	2.9507		38.141	2.38755		38.141	2.46929			2.70355	0.249712	38.141
	38.262	2.79769		38.262	3.07396		38.262	4.69079		38.262	2.32772		38.262	1.97194		38.262	1.49875		38.262	2.77254		38.262	2.462		38.262	2.45341			2.71162	0.287574	38.262
	38.3811	3.40912		38.3811	3.13428		38.3811	4.28553		38.3811	2.34598		38.3811	1.91886		38.3811	1.61329		38.3811	2.92683		38.3811	2.51273		38.3811	2.62108			2.79942	0.253879	38.3811
	38.4985	3.30956		38.4985	3.34995		38.4985	4.72949		38.4985	2.63131		38.4985	1.9184		38.4985	1.52259		38.4985	3.51685		38.4985	2.4092		38.4985	2.69259			2.97698	0.297442	38.4985
	38.614	3.06473		38.614	3.47898					38.614	2.86114		38.614	2.13186		38.614	1.56174		38.614	3.38705		38.614	2.52723		38.614	2.70846			2.80631	0.211244	38.614
	38.7278	3.56108		38.7278	3.60291					38.7278	2.76749		38.7278	2.24887		38.7278	1.45013		38.7278	3.18533		38.7278	2.65743		38.7278	2.62663			2.82731	0.240575	38.7278
	38.8398	3.89996								38.8398	2.59443		38.8398	2.1212		38.8398	1.57538		38.8398	3.52044		38.8398	2.75603		38.8398	2.76945			2.81573	0.280912	38.8398
	38.9501	3.69656								38.9501	2.5945		38.9501	2.16594		38.9501	1.79015		38.9501	3.64867		38.9501	2.6155		38.9501	2.73036			2.81003	0.251969	38.9501
	39.0587	3.68192								39.0587	2.94793		39.0587	2.24806		39.0587	1.63473		39.0587	3.68845		39.0587	2.65051		39.0587	2.77614			2.90394	0.263494	39.0587
	39.1657	4.07172								39.1657	2.8849		39.1657	2.44877		39.1657	1.64587		39.1657	2.74306		39.1657	2.71106		39.1657	2.93145			2.83899	0.266436	39.1657
										39.271	2.87782		39.271	2.57251		39.271	1.69576		39.271	3.54742		39.271	2.70997		39.271	3.09165			2.80007	0.25055	39.271
										39.3747	2.72294					39.3747	1.66496		39.3747	3.73151		39.3747	2.60781		39.3747	3.18302			2.7722	0.279697	39.3747
										39.4769	2.80109					39.4769	1.7243		39.4769	3.55054		39.4769	2.66212						2.70783	0.291288	39.4769
										39.5774	3.01438					39.5774	1.68488		39.5774	3.39657		39.5774	2.72682						2.76741	0.290805	39.5774
										39.6765	2.86263					39.6765	1.68604		39.6765	3.26271		39.6765	2.78764						2.69233	0.265051	39.6765
										39.774	2.89474								39.774	3.77145		39.774	2.92187						3.1207	0.217011	39.774
										39.87	3.04858								39.87	3.76677		39.87	2.92094						3.19622	0.192549	39.87
										39.9645	2.82962								39.9645	4.23619		39.9645	2.90963						3.20126	0.34549	39.9645
										40.0576	3.03733								40.0576	4.17831		40.0576	3.16053						3.35338	0.276507	40.0576
										40.1493	2.85659								40.1493	4.13853		40.1493	2.97177						3.20587	0.31207	40.1493
										40.2396	2.96261								40.2396	3.97566		40.2396	2.93501						3.20897	0.255645	40.2396
										40.3285	2.87216								40.3285	4.16646		40.3285	3.03444						3.23631	0.312402	40.3285
										40.416	3.05163								40.416	4.1521		40.416	3.00413						3.31487	0.2793	40.416
																			40.5022	4.44758		40.5022	2.99806
																			40.5871	4.49657
																			40.6707	4.39438
																			40.753	4.33494
																			40.834	4.4429
																			40.9138	4.84399
																			40.9924	4.42356
																			41.0698	4.79859
																			41.146	4.59719
																			41.221	4.73167
																			41.2949	5.21981
																			41.3677	4.76084
																			41.4393	5.17613
																			41.5098	4.7507
																			41.5793	5.02543

## Sheet: Q10
			Q10
			MEAN	SEM			Q10
		rTRPV1	6.89639	1.3499			rTRPV1	untransfected	rTRPV2	rTRPV2 + CBD
		untransfected	2.6803	0.343816			6.60693	2.75423	3.98107	2.45471
		rTRPV2	2.35126	0.371554			19.9526	2.04174	3.63078	2.5704
		rTRPV2 + CBD	1.96244	0.224573			6.45654	1.41254	3.54813	5.12861
							3.89045	1.69824	1.47911	1.62181
							4.16869	1.90546	1.51356	1.69824
							5.49541		1.47911	1.77828
							4.2658		2.0893	2.51189
							6.0256		3.31131	1.7378
							6.45654		3.0903	1.65959
							5.12861
							7.4131
