# Supplementary material for: Cannabidiol sensitizes TRPV2 channels to activation by 2-APB
Source: eLife. 2023 May 18;12:e86166. doi: 10.7554/eLife.86166 (PMC10195083; doi:10.7554/eLife.86166)
Supplement: Figure 1—source data 1. [file elife-86166-fig1-data1.xlsx]

## Sheet: whole-cell rTRPV2 
whole-cell	no sensitization
gap-free -80mV		raw						subtracted					norm to 0.5mM 2APB
rTRPV2 WT		control	0.5 mM 2APB	10uM CBD	CBD+2APB	6mM 2APB		0.5 mM 2APB	10uM CBD	CBD+2APB	6mM 2APB		0.5 mM 2APB	10uM CBD	CBD+2APB	6mM 2APB		1	0
		-5.12732	-157.614	-18.0493	-6019.05	-6630.75		-152.487	-12.922	-6013.92	-6625.62		1	0.0847417	39.439	43.4505		0.244493	0.0736526
0.5 mM 2-APB		-2.23619	-9.67602	-4.03339	-3968.08	-3735.04		-7.43983	-1.7972	-3965.84	-3732.8		1	0.241565	533.056	501.732		420.949	165.98
10uM CBD		-4.34361	-66.4238	-31.5544	-6195.8	-6017.17		-62.0802	-27.2108	-6191.46	-6012.83		1	0.438317	99.7332	96.8558		406.085	160.886
6mM 2APB		-14.8071	-30.23	-20.6489	-7358.84	-7016.56		-15.4229	-5.8418	-7344.03	-7001.75		1	0.378774	476.177	453.984
		-5.71436	-12.3543	-6.23936	-6355.74	-6210.09		-6.63994	-0.525	-6350.03	-6204.38		1	0.079067	956.338	934.402
													1	0.244493	420.949	406.085	mean
													0	0.0736526	165.98	160.886	sem
	6mM 2APB sens	raw											leak-subtracted										norm to 2APB_1																1	1	1	1	1
		control	0.5 mM 2APB_1	6mM 2APB_1	6mM 2APB_2	6mM 2APB_3	0.5 mM 2APB_2	2APB+DMSO	10uM CBD	CBD+DMSO	CBD+2APB		0.5 mM 2APB_1	6mM 2APB_1	6mM 2APB_2	6mM 2APB_3	0.5 mM 2APB_2	2APB+DMSO	10uM CBD	CBD+DMSO	CBD+2APB		0.5 mM 2APB_1	6mM 2APB_1	6mM 2APB_2	6mM 2APB_3	0.5 mM 2APB_2	2APB+DMSO	10uM CBD	CBD+DMSO	CBD+2APB		1	0					0.905631	0.677072	12.6784	14.0064	6.25136
		-13.8964	-175.082	-34082.4	-21754.7	-21056	-159.871	-170.153	-7.88511	-7.10411	-19478.7		-161.186	-34068.5	-21740.8	-21042.1	-145.975	-156.257	6.01129	6.79229	-19464.8		1	211.362	134.881	130.546	0.905631	0.96942	-0.0372942	-0.0421396	120.76		306.591	125.699					0.96942	0.659799	9.66653	12.9337	5.33781
		-157.169	-206.437	-9599.37	-5449.42	-4177.98	-190.527	-189.676	-168.264	-170.178	-3643.86		-49.268	-9442.2	-5292.25	-4020.81	-33.358	-32.507	-11.095	-13.009	-3486.69		1	191.65	107.418	81.611	0.677072	0.659799	0.225197	0.264046	70.7699				5.91345	2.40567			-0.0372942	0.225197	0.0797165	0.236338	-0.139235
		-1.31627	-16.8576	-6105.66	-5641.43	-4886.21	-198.356	-151.547	-2.55517	-2.92904	-3896.35		-15.5413	-6104.34	-5640.11	-4884.89	-197.04	-150.231	-1.2389	-1.61277	-3895.03		1	392.781	362.911	314.316	12.6784	9.66653	0.0797165	0.103773	250.624		5.91345	2.40567					-0.0421396	0.264046	0.103773	0.349436	-0.0986025
		-4.80042	-31.3949	-23133.4	-23956.2	-20839.3	-377.293	-348.765	-11.0857	-14.0935	-17993.8		-26.5945	-23128.6	-23951.4	-20834.5	-372.493	-343.965	-6.28528	-9.29308	-17989		1	869.677	900.615	783.414	14.0064	12.9337	0.236338	0.349436	676.419		0.0729443	0.0731768
		-101.678	-155.489	-13567.7	-13572.7	-12105.1	-438.07	-388.911	-94.1856	-96.3721	-8406.56		-53.811	-13466	-13471	-12003.4	-336.392	-287.233	7.4924	5.3059	-8304.88		1	250.247	250.34	223.066	6.25136	5.33781	-0.139235	-0.0986025	154.334				0.115303	0.0859126
																																	254.581	109.478
																							1	383.143	351.233	306.591	6.90378	5.91345	0.0729443	0.115303	254.581	mean
													normalized 6mM peaks	1	0.63815	0.617641							0	126.619	144.636	125.699	2.8193	2.40567	0.0731768	0.0859126	109.478	sem
														1	0.560489	0.425834		1	0
														1	0.923951	0.800232		0.831707	0.0973505
														1	1.03558	0.900811		0.727181	0.0909
														1	1.00037	0.891386
																		1	1	1	1	1
														1	0.831707	0.727181	mean	0.63815	0.560489	0.923951	1.03558	1.00037
														0	0.0973505	0.0909	sem	0.617641	0.425834	0.800232	0.900811	0.891386

## Sheet: outside-out rTRPV2
outside-out
gap-free -80mV
rTRPV2 WT		raw data							leak-subtracted						norm to 0.5mM2APB
		control	0.5mM2APB	6mM 2APB	0.5mM2APB	10uM CBD	CBD+2APB		0.5mM2APB	6mM 2APB	0.5mM2APB	10uM CBD	CBD+2APB		0.5mM2APB	6mM 2APB	0.5mM2APB	10uM CBD	CBD+2APB
0.5 mM 2-APB		-5.14629	-29.4438	-3297	-21.0512	-10.7041	-3398.64		-24.2975	-3291.85	-15.9049	-5.55781	-3393.49		1	135.481	0.65459	0.22874	139.664		1	0
10uM CBD		-6.01093	-57.7469	-3856.36	-199.668	-17.9001	-5419.23		-51.736	-3850.35	-193.657	-11.8892	-5413.22		1	74.4231	3.74318	0.229805	104.632		198.232	61.5683
6mM 2APB		-6.54704	-17.2642	-2089.81	-21.6274	-12.9175	-3192.85		-10.7172	-2083.26	-15.0804	-6.37046	-3186.3		1	194.386	1.40712	0.594417	297.309		1.63351	0.575526
		-15.4839	-28.6951	-5906.09	-18.4271	-14.4299	-1528.88		-13.2112	-5890.61	-2.9432	1.054	-1513.4		1	445.88	0.222781	-0.0797808	114.554		0.355501	0.143828
		-31.1463	-60.3067	-7284.02	-103.441	-55.7172	-9597.36		-29.1604	-7252.87	-72.2947	-24.5709	-9566.21		1	248.723	2.47921	0.842612	328.055		176.131	48.4657
	-120.835	-78.5068	-100.082	-2073.35	-148.757	-127.679	-1686.58		-21.5752	-1952.51	-27.922	-6.844	-1565.74		1	90.4981	1.29417	0.317216	72.5715
															1	198.232	1.63351	0.355501	176.131	mean
															0	56.2039	0.525381	0.131296	44.2429	sem

## Sheet: inside-out rTRPV2
inside-out
gap-free -80mV
rTRPV2 WT
0.5 mM 2-APB
10uM CBD
6mM 2APB		raw data:
						cell1			cell2			cell3			cell4			cell5			cell6			cell7			cell8			cell9
			Imax	6mM 2APB		-415.697	-1.37139		-1403.15	-2.58629		-188.437	-6.70774		-340.594	-36.7377		-312.742	-4.48509		-194.968	-5.84249		-2810.99	-6.63348		-2008.1	-41.6419		-2555.09	-1.46168
			I1	0.5mM 2APB		-4.29594	-1.37139		-4.58868	-2.58629		-4.57993	-2.59765		-35.1976	-32.825		-5.43309	-4.48509		-8.74168	-5.84249		-5.02176	-4.7371		-32.7151	-14.1303		-5.01524	-1.46168
				CBD		-1.53362	-1.37139		-2.7946	-2.58629		-4.54248	-2.59765		-35.749	-32.825		-5.36447	-4.48509		-9.75894	-5.84249		-4.87168	-4.7371		-13.7923	-14.1303		-2.66143	-1.46168
			I2	2APB+CBD		-399.054	-1.82206		-1411.35	-4.58868		-141.738	-2.59765		-430.704	-32.825		-230.264	-5.35529		-220.157	-9.7891		-2705.27	-5.02176		-2716.84	-14.1303		-2507.45	-2.65413
			Imax,2	6mM 2APB		-168.148	-3.13191		-527.247	-5.85946		-98.2324	-5.56713		-130.387	-38.5665		-153.789	-5.74253		-110.102	-12.3288		-591.321	-8.22472		-1671.4	-13.9806		-700.264	-5.64692
		subtracted		6mM 2APB		-414.325	-1400.56	-181.729	-303.857	-308.257	-189.126	-2804.36	-1966.46	-2553.63
				0.5mM 2APB		-2.92455	-2.00239	-1.98228	-2.37253	-0.948001	-2.8992	-0.284658	-18.5849	-3.55356
				CBD		-0.162231	-0.208311	-1.94483	-2.92398	-0.879385	-3.91645	-0.13458	0.337961	-1.19975
				2APB+CBD		-397.232	-1406.76	-139.14	-397.879	-224.909	-210.368	-2700.25	-2702.71	-2504.79
				6mM 2APB		-165.017	-521.388	-92.6653	-91.8202	-148.047	-97.7729	-583.096	-1657.42	-694.617
		norm to 0.5mM 2APB														6mM2APB	0.5mM 2APB	CBD	2APB+CBD	6mM2APB
				6mM 2APB		141.672	699.444	91.6767	128.073	325.165	65.2339		105.81	718.612		141.672	1	0.055472	135.827	56.4246
				0.5mM 2APB		1	1	1	1	1	1		1	1		699.444	1	0.104031	702.543	260.383
				CBD		0.055472	0.104031	0.981109	1.23243	0.92762	1.35088		-0.0181847	0.33762		91.6767	1	0.981109	70.1921	46.7468
				2APB+CBD		135.827	702.543	70.1921	167.703	237.245	72.5609		145.425	704.868		128.073	1	1.23243	167.703	38.7014
				6mM 2APB		56.4246	260.383	46.7468	38.7014	156.167	33.7242		89.1812	195.47		325.165	1	0.92762	237.245	156.167
																65.2339	1	1.35088	72.5609	33.7242
						mean	sem									105.81	1	-0.0181847	145.425	89.1812
				6mM 2APB		284.461	96.764									718.612	1	0.33762	704.868	195.47
				0.5mM 2APB		1
				CBD		0.621372	0.198485
				2APB+CBD		279.545	94.4381
				6mM 2APB		109.6	29.9573

## Sheet: 2APB dose-response
whole-cell		SEM_noCBD	SEM_+CBD	Mean_noCBD	Mean_+CBD	2APBconc_noCBD	2APBconc_+CBD
gap-free -80 mV		0.001	0.007	0.0041	0.025	2.5e-05	1e-05
		0.008	0.022	0.027	0.089	0.0004	5e-05
WT rTRVP2		0.019	0.029	0.16	0.22	0.0008	0.0001
		0.035	0.04	0.45	0.59	0.0015	0.0002
		0.01	0.018	0.92	1.07	0.003	0.0004
		0	0	1	1	0.004	0.0006
						0.02	0.02

## Sheet: CBD dose-response
whole-cell
gap-free -80 mV		SEM	MEAN	CBDconc
		0.08	0.18	5e-07
WT rTRVP2		0.04	0.31	1e-06
		0.066	0.53	5e-06
		0.08	0.93	1e-05
		0	1	2e-05
				0.0001

## Sheet: I-V curve rTRPV2
whole-cell			RAW DATA																				NORM																				MEAN				SEM
WT rTRPV2			ctrl	2APB	CBD		ctrl	2APB	CBD		ctrl	2APB	CBD		ctrl	2APB	CBD		ctrl	2APB	CBD		ctrl	2APB	CBD		ctrl	2APB	CBD		ctrl	2APB	CBD		ctrl	2APB	CBD		ctrl	2APB	CBD		ctrl	2APB	CBD		ctrl	2APB	CBD
			-17.8253	-2859.95	-81.2262		-277.314	-2127.8	-327.141		-472.57	-1017.49	-392.241		-24.0669	-168.587	-50.6208		-568.339	-8808.94	-1097.63		-0.0553575	-0.424752	-0.0653041		-0.0553575	-0.424752	-0.0653041		-0.156995	-0.338026	-0.130308		-0.0413779	-0.289849	-0.0870317		-0.0428766	-0.664564	-0.0828072		-0.0703929	-0.428389	-0.0861511		0.021853	0.064484	0.0118975
Vhold= 0mV			-10.451	-2712.89	-77.8688		-223.406	-1928.82	-260.627		-438.438	-997.281	-372.796		-23.2859	-254.044	-15.4493		-510.72	-8164.07	-986.996		-0.0445964	-0.385032	-0.0520265		-0.0445964	-0.385032	-0.0520265		-0.145656	-0.331312	-0.123849		-0.0400351	-0.436775	-0.0265617		-0.0385298	-0.615914	-0.074461		-0.0626827	-0.430813	-0.0657848		0.0207787	0.0491885	0.0163764
300ms duration			-6.70886	-2553.51	-128.593		-192.85	-1696.17	-269.375		-376.789	-1015.96	-309.782		-17.6308	-218.534	-12.8489		-449.778	-7183.61	-863.663		-0.0384967	-0.338591	-0.0537728		-0.0384967	-0.338591	-0.0537728		-0.125175	-0.337516	-0.102914		-0.0303123	-0.375723	-0.0220908		-0.0339322	-0.541946	-0.0651565		-0.0532826	-0.386474	-0.0595415		0.0180387	0.0395409	0.0130035
			-8.16971	-2155.24	-65.7706		-165.432	-1410.3	-229.698		-323.298	-772.904	-292.03		-16.1338	-125.307	-17.4451		-381.794	-6035.84	-756.426		-0.0330236	-0.281525	-0.0458525		-0.0330236	-0.281525	-0.0458525		-0.107405	-0.256771	-0.097017		-0.0277386	-0.215438	-0.0299931		-0.0288033	-0.455356	-0.0570663		-0.0459988	-0.298123	-0.0551563		0.0153892	0.0411217	0.0113187
			-9.83066	-1963.26	-95.2415		-133.63	-1297.8	-173.672		-272.041	-718.708	-249.876		-15.0997	-102.31	-17.3499		-331.673	-4983.08	-644.346		-0.0266753	-0.259067	-0.0346684		-0.0266753	-0.259067	-0.0346684		-0.0903762	-0.238766	-0.0830126		-0.0259607	-0.1759	-0.0298294		-0.0250221	-0.375933	-0.0486107		-0.0389419	-0.261746	-0.0461579		0.0128621	0.0323656	0.00973376
0.5mM 2APB			-8.07465	-1568.84	-78.4853		-106.686	-989.918	-159.939		-217.271	-609.102	-207.809		-10.6812	-83.2266	-20.4182		-266.187	-3932.41	-549.196		-0.0212967	-0.197608	-0.0319271		-0.0212967	-0.197608	-0.0319271		-0.0721808	-0.202353	-0.0690374		-0.0183639	-0.14309	-0.0351047		-0.0200817	-0.296669	-0.0414325		-0.030644	-0.207466	-0.0418857		0.0103981	0.0248212	0.00700625
10uM CBD			-3.8272	-1134.72	-66.4182		-83.8942	-747.884	-120.608		-167.923	-505.873	-160.452		-9.58917	-76.0441	-6.97722		-206.532	-2840.02	-422.762		-0.016747	-0.149293	-0.0240759		-0.016747	-0.149293	-0.0240759		-0.0557867	-0.168059	-0.0533048		-0.0164865	-0.130742	-0.0119958		-0.0155812	-0.214257	-0.031894		-0.0242697	-0.162329	-0.0290693		0.00788216	0.01426	0.00684364
			-5.58322	-695.4	-46.3254		-61.6242	-523.116	-77.747		-124.261	-372.319	-123.376		-7.25335	-40.3814	-8.56314		-150.456	-1760.98	-285.552		-0.0123015	-0.104425	-0.0155199		-0.0123015	-0.104425	-0.0155199		-0.0412814	-0.12369	-0.0409873		-0.0124706	-0.0694272	-0.0147225		-0.0113507	-0.132852	-0.0215426		-0.0179411	-0.106964	-0.0216584		0.0058384	0.01089	0.00498543
			-3.8122	-333.476	-23.3156		-39.2576	-259.016	-48.4575		-80.2747	-185.894	-77.0086		-2.63232	-23.8424	-3.24223		-97.2561	-794.049	-160.43		-0.00783661	-0.0517049	-0.0096731		-0.00783661	-0.0517049	-0.0096731		-0.0266685	-0.0617568	-0.0255835		-0.00452571	-0.0409918	-0.00557433		-0.0073372	-0.0599046	-0.0121032		-0.0108409	-0.0532126	-0.0125214		0.00400451	0.00368565	0.00342987
			-2.36136	-62.1155	-7.06723		-19.0252	-47.196	-19.1238		-38.9653	-59.5707	-37.4863		3.0156	-3.84087	0.550724		-42.5992	-84.3492	-56.449		-0.00379782	-0.00942128	-0.0038175		-0.00379782	-0.00942128	-0.0038175		-0.0129449	-0.0197903	-0.0124535		0.00518468	-0.00660355	0.000946852		-0.00321377	-0.00636347	-0.00425863		-0.00371392	-0.01032	-0.00468006		0.00286932	0.00245732	0.00216511
			-1.2107	194.221	3.7305		1.64177	122.606	9.29619		-0.00852445	45.5456	0.518125		2.09718	16.3458	3.19254		7.89775	609.759	47.4131		0.000327731	0.0244746	0.00185571		0.000327731	0.0244746	0.00185571		-2.83196e-06	0.0151309	0.000172129		0.00360565	0.0281031	0.0054889		0.000595822	0.0460014	0.00357694		0.00097082	0.0276369	0.00258988		0.00066551	0.00506889	0.000902832
			-0.140081	507.594	21.6058		18.1367	328.442	41.9957		37.3457	179.823	38.4448		3.50735	33.1587	3.78054		55.4485	1425.97	165.596		0.00362046	0.0655637	0.00838319		0.00362046	0.0655637	0.00838319		0.0124068	0.0597399	0.0127719		0.00603014	0.0570092	0.00649982		0.00418315	0.107578	0.0124929		0.0059722	0.071091	0.00970621		0.00166838	0.00927248	0.0012439
			0.975562	809.395	43.7555		38.2049	547.208	75.8869		74.6826	304.296	84.1328		4.56317	68.4752	9.23395		102.271	2374.28	271.623		0.00762648	0.109234	0.0151486		0.00762648	0.109234	0.0151486		0.0248107	0.101092	0.0279502		0.0078454	0.117728	0.0158758		0.00771549	0.17912	0.0204918		0.0111249	0.123282	0.018923		0.00342169	0.0142054	0.00246708
			2.11122	1187.71	88.2312		53.0774	772.622	105.724		109.19	482.789	119.282		8.94555	88.9678	14.6749		146.554	3527.18	428.95		0.0105953	0.154231	0.0211047		0.0105953	0.154231	0.0211047		0.0362745	0.16039	0.0396275		0.01538	0.152961	0.0252304		0.0110563	0.266098	0.0323609		0.0167803	0.177582	0.0278856		0.00495608	0.0221668	0.00358406
			3.07677	1546.25	100.221		70.171	1208.33	177.577		147.942	692.931	159.624		23.8138	138.102	16.6501		190.838	4562.61	605.543		0.0140076	0.241208	0.035448		0.0140076	0.241208	0.035448		0.0491485	0.230202	0.0530295		0.0409428	0.237436	0.0286263		0.0143972	0.344213	0.0456834		0.0265007	0.258854	0.039647		0.00768163	0.0214342	0.0043142
			3.89224	2312.67	170.556		100.109	1627.95	236.651		183.932	959.008	213.094		29.7149	169.4	26.7908		236.125	5952.37	811.341		0.0199838	0.324971	0.0472405		0.0199838	0.324971	0.0472405		0.061105	0.318597	0.0707932		0.0510883	0.291248	0.046061		0.0178137	0.449058	0.0612092		0.0339949	0.341769	0.0545089		0.00916951	0.0275361	0.00493507
			5.69328	2819.21	207.447		111.833	1959.14	305.199		212.216	1266.44	276.114		40.6925	179.667	26.2649		275.417	7099.95	1168.72		0.0223242	0.391085	0.0609241		0.0223242	0.391085	0.0609241		0.0705015	0.420731	0.0917292		0.069962	0.308898	0.0451569		0.020778	0.535634	0.0881706		0.041178	0.409487	0.069381		0.0118648	0.0366299	0.00889476
			4.80277	3175.83	296.637		139.598	2440.23	377.407		241.634	1535.91	324.724		24.0236	308.549	37.2296		317.351	8520.83	1352.71		0.0278667	0.48712	0.0753382		0.0278667	0.48712	0.0753382		0.0802746	0.510254	0.107878		0.0413033	0.530484	0.0640083		0.0239416	0.642829	0.102051		0.0402506	0.531562	0.0849229		0.0104301	0.0289703	0.00848967
			4.75774	3853.96	422.324		163.114	3361.29	486.216		267.224	2009.11	379.837		16.1627	378.023	60.1653		368.513	10069.3	1737.56		0.0325609	0.670981	0.0970586		0.0325609	0.670981	0.0970586		0.0887761	0.667458	0.126188		0.0277884	0.649929	0.103441		0.0278014	0.75965	0.131085		0.0418975	0.6838	0.110966		0.011768	0.0193599	0.00734819
			5.78333	4389.07	496.151		180.633	4153.5	576.302		295.014	2587.77	481.017		15.982	469.414	69.1797		412.822	11713.2	2290.96		0.036058	0.829124	0.115042		0.036058	0.829124	0.115042		0.0980083	0.859696	0.159801		0.0274775	0.807057	0.11894		0.0311441	0.883671	0.172835		0.0457492	0.841734	0.136332		0.0131644	0.0134198	0.0124344
			7.42428	4841.56	738.634		203.067	5009.51	688.795		322.889	3010.09	555.274		17.3849	581.637	84.2149		462.291	13255.2	2884		0.0405363	1	0.137498		0.0405363	1	0.137498		0.107269	1	0.184471		0.0298896	1	0.144789		0.0348762	1	0.217575		0.0506215	1	0.164366		0.0143005		0.0159097

## Sheet: I-V curve untransfected
																						NORM to 2-APB+CBD																		MEAN			SEM			NORM to control
whole-cell		control											2APB+CBD									control									2APB+CBD									ctrl	2APB+CBD		ctrl	2APB+CBD		control
untransfected HEK293		-5.96768	-10.3351	-24.5254	-18.3033	-18.9383	-10.971	-14.5502	-66.293				-7.74874	-8.46216	-25.0449	-21.1359	-10.6982	-7.8998	-11.6056	-19.1116		-1.09556	-0.838129	-1.03715	-0.697687	-1.71688	-0.835917	-1.55707	-6.56777		-1.42254	-0.686242	-1.05912	-0.805661	-0.969861	-0.601913	-1.24195	-1.89342		-1.79327	-1.08509		0.877417	0.190971		-1.26245	-0.990524	-0.649558	-0.407193
		-4.58216	-9.2871	-21.3512	-17.042	-22.8302	-12.8975	-10.8462	-40.47				-5.31074	-7.08628	-18.7453	-15.6844	-10.7238	-7.04029	-15.6152	-18.2037		-0.841207	-0.75314	-0.902918	-0.649609	-2.06971	-0.982706	-1.16069	-4.00944		-0.974961	-0.574664	-0.792718	-0.59786	-0.972179	-0.536424	-1.67104	-1.80348		-1.42118	-0.990415		0.507834	0.220197		-0.969349	-0.890082	-0.565487	-0.379133
Vhold= 0mV		-4.30144	-9.40574	-18.3217	-14.2657	-15.3071	-8.98478	-12.1909	-40.7599				-5.90745	-5.85524	-17.8502	-14.154	-11.3375	-7.56179	-10.9819	-13.8016		-0.78967	-0.762761	-0.774804	-0.543782	-1.38769	-0.684582	-1.30459	-4.03816		-1.08451	-0.474832	-0.754867	-0.539524	-1.02782	-0.576159	-1.17521	-1.36735		-1.28575	-0.875033		0.514895	0.148919		-0.909962	-0.901453	-0.485251	-0.317369
300ms duration		-3.98449	-10.5724	-14.1227	-11.8446	-15.0174	-8.25168	-9.0828	-28.6092				-5.71991	-8.16216	-16.5375	-16.3183	-7.02416	-5.62064	-8.52042	-10.7498		-0.731484	-0.857372	-0.597235	-0.451493	-1.36142	-0.628724	-0.971983	-2.83437		-1.05008	-0.661913	-0.699351	-0.622023	-0.636785	-0.428256	-0.9118	-1.065		-1.05426	-0.759401		0.345011	0.101106		-0.842912	-1.01327	-0.374041	-0.263506
		-3.46832	-7.56678	-11.3271	-11.4676	-11.4634	-7.0753	-6.90873	-35.3327				-4.40715	-4.92419	-13.8096	-13.5563	-8.03857	-4.35551	-6.73837	-9.68933		-0.636724	-0.61363	-0.479013	-0.437125	-1.03923	-0.539092	-0.739327	-3.50048		-0.809077	-0.399329	-0.583994	-0.516741	-0.728748	-0.331862	-0.721097	-0.95994		-0.998078	-0.631348		0.459932	0.0950193		-0.733716	-0.725205	-0.3	-0.255121
0.5 mM 2APB+10uM CBD		-2.35447	-5.00936	-8.97707	-7.67651	-7.71631	-4.29633	-10.806	-22.707				-3.25634	-4.34488	-13.5795	-16.0376	-6.16319	-4.37483	-6.17034	-8.68225		-0.432241	-0.406236	-0.37963	-0.292614	-0.699533	-0.327352	-1.15638	-2.24962		-0.597809	-0.352349	-0.574261	-0.611322	-0.558733	-0.333333	-0.66031	-0.860166		-0.742952	-0.568535		0.300491	0.0752793		-0.498084	-0.480101	-0.237758	-0.170779
		-2.38164	-3.12426	-7.01682	-6.92988	-7.73563	-2.49767	-4.37231	-15.4359				-2.56586	-5.25523	-11.8064	-10.2691	-5.74549	-3.71812	-4.80039	-6.31714		-0.437228	-0.253363	-0.296734	-0.264154	-0.701284	-0.190306	-0.467896	-1.52927		-0.471048	-0.426174	-0.499279	-0.391439	-0.520866	-0.283297	-0.513707	-0.62585		-0.517529	-0.466458		0.196839	0.0455115		-0.503831	-0.299431	-0.185841	-0.154169
		-2.12808	-2.26081	-5.37956	-5.05243	-4.59695	-2.48062	-3.51878	-12.9961				-2.71078	-4.34488	-7.13497	-11.3739	-3.92125	-2.98416	-3.50841	-4.23431		-0.390679	-0.183341	-0.227496	-0.192589	-0.416743	-0.189007	-0.376557	-1.28755		-0.497653	-0.352349	-0.30173	-0.433552	-0.355487	-0.227373	-0.375447	-0.419501		-0.407995	-0.370386		0.164958	0.0371631		-0.450192	-0.216677	-0.142478	-0.112401
		-1.54852	-1.64123	-3.45272	-3.87812	-2.32745	-0.468845	-2.24654	-7.03756				-1.68784	-3.60004	-4.44125	-6.38424	-2.67668	-2.74272	-2.89583	-3.67737		-0.284281	-0.133096	-0.146012	-0.147827	-0.210998	-0.0357229	-0.240411	-0.697224		-0.309859	-0.291946	-0.187815	-0.243355	-0.242658	-0.208977	-0.309893	-0.364324		-0.236946	-0.269853		0.0898043	0.0264544		-0.327586	-0.157296	-0.0914454	-0.0862765
		-0.923677	-1.06119	-2.61738	-1.29029	0.424928	-0.0511468	-1.77952	-2.74578				-1.67079	-2.22416	-2.44652	-3.48643	-1.78161	-2.1343	-2.02708	-2.2049		-0.169571	-0.0860579	-0.110686	-0.0491835	0.0385225	-0.00389705	-0.190433	-0.272029		-0.306729	-0.180369	-0.103461	-0.132896	-0.161515	-0.16262	-0.216925	-0.218443		-0.105417	-0.18537		0.0458858	0.0279755		-0.195402	-0.101706	-0.0693215	-0.0287051
		0.0181113	-0.0329563	-0.167067	1.14532	2.11498	1.41506	-0.853526	1.57822				-1.35539	-1.21036	-0.571139	-0.380338	-1.03998	-1.33273	-0.9133	-0.831604		0.00332493	-0.00267261	-0.00706508	0.0436573	0.191737	0.107818	-0.0913388	0.156357		-0.248826	-0.0981544	-0.0241528	-0.0144978	-0.0942813	-0.101545	-0.0977354	-0.0823885		0.0502272	-0.0951977		0.0424163	0.0317949		0.00383142	-0.00315856	-0.00442478	0.0254798
		0.41656	0.685492	1.89343	4.22607	3.11936	3.41831	0.0322085	5.59623				-0.230161	0.144829	1.12523	2.1643	-0.110818	-0.164177	-0.9133	0.572205		0.0764733	0.0555902	0.0800709	0.16109	0.28279	0.260453	0.00344674	0.554429		-0.0422535	0.011745	0.0475847	0.0824991	-0.0100464	-0.0125092	-0.0977354	0.0566893		0.184293	0.00449671		0.0801424	0.0261071		0.0881226	0.065698	0.0501475	0.0940172
		0.624841	1.45667	4.55536	7.82149	4.10442	5.16582	0.893786	9.79944				0.0937691	1.23105	3.58027	5.56018	0.647859	0.540818	0.334134	1.52588		0.11471	0.118129	0.192641	0.29814	0.372092	0.393602	0.0956472	0.970849		0.0172144	0.0998322	0.151406	0.211943	0.0587326	0.0412068	0.0357569	0.151172		0.319476	0.095908		0.128914	0.0310754		0.132184	0.139608	0.120649	0.174004
		0.606729	2.74856	7.28412	12.439	7.97706	7.69759	2.12576	13.4873				0.511468	2.32761	5.36189	8.43988	1.57703	0.60842	1.55929	1.58691		0.111385	0.222895	0.308038	0.474151	0.723172	0.586506	0.227485	1.33621		0.0938967	0.188758	0.226748	0.321712	0.142968	0.0463576	0.166865	0.157218		0.498731	0.168066		0.176968	0.0372413		0.128352	0.263424	0.19292	0.27673
		1.56663	3.52633	11.2046	17.6582	10.3625	9.07003	4.45283	18.8903				1.82424	3.81728	7.48448	11.7361	2.32718	1.4293	2.2387	2.50244		0.287606	0.285969	0.473832	0.673095	0.939423	0.691077	0.476513	1.8715		0.334898	0.309564	0.31651	0.447359	0.210974	0.108904	0.239571	0.247921		0.712376	0.276963		0.231263	0.0446761		0.331418	0.337966	0.296755	0.39284
		2.22769	4.59411	15.3368	19.7603	12.9217	13.1191	5.70896	22.8922				1.1167	6.40352	9.35134	15.621	3.1711	3.95956	3.10745	3.97491		0.408966	0.372561	0.648575	0.753226	1.17143	0.999593	0.610936	2.26797		0.205008	0.519295	0.395458	0.595444	0.287481	0.301692	0.332539	0.393802		0.904158	0.37884		0.274769	0.0570224		0.471264	0.440303	0.406195	0.439607
		3.15137	6.1892	18.4999	21.7827	15.1139	15.0031	7.33549	26.0567				2.19079	5.46213	10.2805	15.5667	3.35864	5.07982	4.28805	3.95203		0.578537	0.501915	0.78234	0.830317	1.37017	1.14313	0.784997	2.58148		0.402191	0.442953	0.434751	0.593372	0.304482	0.387049	0.45888	0.391534		1.07161	0.426902		0.300746	0.0368358		0.666667	0.593178	0.489971	0.4846
		2.97026	9.20141	20.4267	26.2263	17.8277	17.3899	10.4114	33.0057				2.53177	6.84835	14.8752	21.3261	4.78222	8.73034	6.31513	5.46265		0.545288	0.746191	0.863824	0.999696	1.61619	1.325	1.11416	3.26993		0.464789	0.555369	0.629056	0.81291	0.433539	0.665195	0.675805	0.541194		1.31004	0.597232		0.384399	0.0554338		0.628352	0.88187	0.541003	0.583455
		2.80726	9.39256	31.0411	34.6349	18.7934	19.4017	14.0188	39.7453				3.36716	8.50354	16.4011	20.6831	5.53238	10.8453	6.87202	6.63757		0.515364	0.761692	1.31269	1.32022	1.70374	1.47828	1.5002	3.93764		0.618153	0.689597	0.693583	0.788402	0.501546	0.826343	0.735399	0.657596		1.56623	0.688827		0.463866	0.0453754		0.59387	0.900189	0.822124	0.770522
		5.45151	9.65621	37.4787	41.6155	25.0515	19.1971	18.1817	42.6682				4.13436	11.007	20.7315	19.2161	10.0162	6.52844	8.58724	9.04846		1.0008	0.783073	1.58493	1.5863	2.27108	1.46269	1.94569	4.22722		0.758998	0.892617	0.876712	0.732482	0.908037	0.497425	0.918951	0.896447		1.85772	0.810209		0.477686	0.0647069		1.15326	0.925458	0.992625	0.925819
		4.72706	10.434	37.7571	44.9499	31.2902	25.4626	18.7454	54.5289				5.44713	12.3312	23.6469	26.2342	11.0307	13.1245	9.34461	10.0937		0.867806	0.846147	1.59671	1.71341	2.83666	1.94008	2.00601	5.40228		1	1	1	1	1	1	1	1		2.15114	1		0.653658	0		1	1	1	1
[truncated: 16 more columns]
