# Supplementary material for: Cannabidiol sensitizes TRPV2 channels to activation by 2-APB
Source: eLife. 2023 May 18;12:e86166. doi: 10.7554/eLife.86166 (PMC10195083; doi:10.7554/eLife.86166)
Supplement: Figure 4—source data 1. [file elife-86166-fig4-data1.xlsx]

## Sheet: TRPV1
			control	CBD		control	CBD		control	CBD		control	CBD		control	CBD		control	CBD
			-0.228955	-0.273789		-0.028698	-0.128709		-0.0811432	-0.0996518		-0.166637	-0.172218		-0.147606	-0.113623		-0.609451	-0.556391
			-0.232686	-0.240991		-0.0260937	-0.134745		-0.0729633	-0.0789028		-0.154483	-0.154221		-0.14738	-0.108416		-0.492315	-0.578456
			-0.178767	-0.227618		-0.0195305	-0.114999		-0.0641483	-0.0944173		-0.135856	-0.130926		-0.114881	-0.0988771		-0.490268	-0.533267
			-0.14113	-0.232367		-0.0178242	-0.0995419		-0.0577745	-0.0589107		-0.130904	-0.107423		-0.107213	-0.103088		-0.398506	-0.394778
			-0.142076	-0.118688		-0.0168906	-0.0900324		-0.047869	-0.0600842		-0.0936786	-0.107491		-0.0775528	-0.0868679		-0.361427	-0.344361
			-0.0962521	-0.109227		-0.018649	-0.0727211		-0.0407922	-0.0580185		-0.0771194	-0.0802389		-0.0718346	-0.073319		-0.250202	-0.251255
			-0.0772385	-0.105248		-0.0107051	-0.06478		-0.0327693	-0.0407789		-0.0801667	-0.0711423		-0.0509324	-0.0571048		-0.217381	-0.224795
			-0.0574273	-0.0680047		-0.00797081	-0.0472997		-0.0240718	-0.029888		-0.0552991	-0.0588974		-0.0353463	-0.0424651		-0.14522	-0.186404
			-0.0375113	-0.0420741		-0.00567967	-0.0291764		-0.0157002	-0.02295		-0.0369324	-0.0447117		-0.0271769	-0.0265124		-0.0971234	-0.103048
			-0.0180619	-0.0204407		-0.00376525	-0.0146157		-0.00921589	-0.010599		-0.0177127	-0.0196991		-0.0116777	-0.0129969		-0.0564301	-0.0561586
			4.31661e-05	0.00205222		-0.000666723	0.00130716		-0.00115751	-0.0017683		0.000808866	-0.000231808		0.000416427	0.000832279		-0.00942582	-0.010199
			0.0184442	0.027316		0.00204256	0.0166233		0.00779248	0.011621		0.0183859	0.0197916		0.0127586	0.0156593		0.0357058	0.0360172
			0.0376388	0.0485049		0.00453314	0.0376975		0.01597	0.0265893		0.0390544	0.0404604		0.0253297	0.0302293		0.0838211	0.0957038
			0.051197	0.0712719		0.00680501	0.0592941		0.0247866	0.0381184		0.0532994	0.0625791		0.0364087	0.0529449		0.140357	0.148014
			0.0732631	0.0943575		0.0100702	0.0857823		0.0322414	0.0510697		0.0795834	0.108568		0.0536099	0.0831219		0.158029	0.203884
			0.0898491	0.108805		0.0155967	0.107118		0.0429052	0.0661516		0.100722	0.135		0.0755917	0.11244		0.224216	0.284129
			0.106803	0.154324		0.0165939	0.149517		0.0511853	0.0901993		0.126108	0.178726		0.0840741	0.157947		0.244447	0.366587
			0.139478	0.188619		0.0241398	0.18831		0.0604848	0.115491		0.156109	0.236706		0.126971	0.193131		0.314648	0.458955
			0.151735	0.217809		0.0252969	0.238044		0.0687823	0.114712		0.201046	0.287747		0.128256	0.248984		0.393762	0.49834
			0.196282	0.272804		0.0371236	0.27105		0.07752	0.130919		0.248833	0.398208		0.182079	0.314263		0.410036	0.703763
			0.19775	0.344565		0.0356928	0.339452		0.0850734	0.236995		0.290983	0.496839		0.28853	0.454273		0.469075	0.800718
																					CONTROL			CBD
																					mean	SEM		mean	SEM
			-0.664475	-0.794594		-0.0845421	-0.379168		-0.342384	-0.420481		-0.335395	-0.346628		-0.324927	-0.25012		-0.761131	-0.694865		-0.418809	0.101798		-0.480976	0.0874592
			-0.675303	-0.699407		-0.0768701	-0.396947		-0.307869	-0.33293		-0.310932	-0.310403		-0.324431	-0.238657		-0.614842	-0.722422		-0.385041	0.0907654		-0.450128	0.0850667
			-0.51882	-0.660596		-0.0575355	-0.338778		-0.270674	-0.398394		-0.273441	-0.263518		-0.25289	-0.21766		-0.612285	-0.665986		-0.330941	0.0821044		-0.424155	0.0797462
			-0.40959	-0.674379		-0.0525088	-0.293243		-0.243779	-0.248574		-0.263474	-0.216212		-0.23601	-0.226929		-0.497686	-0.493031		-0.283841	0.0630779		-0.358728	0.0756696
			-0.412334	-0.344457		-0.0497585	-0.265229		-0.201983	-0.253525		-0.188549	-0.216349		-0.170718	-0.191224		-0.451379	-0.430065		-0.245787	0.0630512		-0.283475	0.0362645
			-0.279344	-0.316999		-0.0549384	-0.214231		-0.172123	-0.244809		-0.15522	-0.161499		-0.158131	-0.161398		-0.312473	-0.313787		-0.188705	0.0381918		-0.235454	0.0284471
			-0.224162	-0.305453		-0.0315365	-0.190837		-0.13827	-0.172067		-0.161354	-0.14319		-0.112118	-0.125706		-0.271482	-0.280742		-0.156487	0.034516		-0.202999	0.0301091
			-0.166666	-0.197364		-0.0234814	-0.139341		-0.101571	-0.126112		-0.111302	-0.118544		-0.0778084	-0.0934792		-0.181362	-0.232797		-0.110365	0.0237328		-0.151273	0.0215694
			-0.108866	-0.122108		-0.0167319	-0.0859514		-0.0662468	-0.0968375		-0.0743347	-0.0899923		-0.0598251	-0.0583622		-0.121295	-0.128695		-0.0745499	0.0152659		-0.0969911	0.0104866
			-0.0524195	-0.0593231		-0.0110921	-0.0430567		-0.0388865	-0.0447223		-0.0356507	-0.0396489		-0.0257064	-0.0286103		-0.0704744	-0.0701354		-0.0390383	0.00844099		-0.0475828	0.00604985
			0.000125277	0.00595596		-0.00196411	0.00385079		-0.00488411	-0.00746132		0.00162802	-0.000466566		0.000916688	0.00183211		-0.0117717	-0.0127373		-0.00265833	0.00206068		-0.00150439	0.00293376
			0.0535291	0.0792767		0.00601723	0.0489709		0.0328804	0.0490348		0.0370057	0.039835		0.0280857	0.0344712		0.0445922	0.0449812		0.033685	0.00663648		0.0494283	0.00639483
			0.109236	0.140771		0.0133543	0.111054		0.0673854	0.112194		0.0786058	0.0814356		0.0557587	0.0665443		0.104682	0.119523		0.0715037	0.0144004		0.105254	0.0109737
			0.148584	0.206846		0.020047	0.174676		0.104587	0.160841		0.107277	0.125954		0.0801472	0.116548		0.175289	0.184851		0.105989	0.0221166		0.161619	0.0142122
			0.212625	0.273845		0.0296661	0.252708		0.136043	0.215489		0.160179	0.218517		0.118012	0.182978		0.197359	0.254626		0.142314	0.0268404		0.233027	0.013593
			0.260761	0.315774		0.0459467	0.315562		0.181038	0.279127		0.202726	0.271718		0.166401	0.247517		0.280019	0.354843		0.189482	0.0339899		0.297423	0.0157574
			0.309965	0.44788		0.0488843	0.440467		0.215976	0.380596		0.253821	0.359725		0.185074	0.347692		0.305285	0.457823		0.219834	0.0395927		0.405697	0.019844
			0.404794	0.547411		0.071114	0.554746		0.255216	0.487313		0.314204	0.476425		0.279503	0.425142		0.392957	0.57318		0.286298	0.0495017		0.510703	0.0232618
			0.440367	0.632128		0.0745228	0.701259		0.290227	0.484028		0.404651	0.579155		0.282331	0.548092		0.491761	0.622366		0.330643	0.0613842		0.594505	0.0306503
			0.569652	0.791735		0.109363	0.798493		0.327096	0.552412		0.500832	0.801484		0.400814	0.691793		0.512085	0.878915		0.403307	0.0686129		0.752472	0.0468172
			0.573912	1		0.105148	1		0.358967	1		0.585668	1		0.635147	1		0.585818	1		0.47411	0.0837074		1	0

## Sheet: TRPV3
			normalized data
			CBD	control		CBD	control		CBD	control		CBD	control		CBD	control		CBD	control		CBD	control
			-0.70716	-0.180679		-0.299413	-0.122212		-0.356941	-0.0383931		-0.489147	-0.121017		-0.344251	-0.194332		-0.733955	-0.465303		-0.245282	-0.0333581
			-0.732169	-0.147377		-0.358585	-0.110867		-0.244284	-0.0335452		-0.540325	-0.0974323		-0.335942	-0.220925		-0.546969	-0.475083		-0.259666	-0.0318782
			-0.72323	-0.132425		-0.298244	-0.101336		-0.309485	-0.0292897		-0.580811	-0.0839287		-0.307436	-0.195631		-0.588304	-0.357506		-0.263065	-0.0239016
			-0.538641	-0.110152		-0.237491	-0.0672264		-0.311653	-0.0246913		-0.67622	-0.0719724		-0.17164	-0.180179		-0.476086	-0.282333		-0.254498	-0.019561
			-0.367547	-0.120345		-0.140559	-0.0456482		-0.24883	-0.0328594		-0.697657	-0.066721		-0.224952	-0.151983		-0.41406	-0.233016		-0.22683	-0.0286242
			-0.409842	-0.110476		-0.195921	-0.0390924		-0.234881	-0.0440827		-0.52578	-0.0691122		-0.19026	-0.119917		-0.338045	-0.214332		-0.204448	-0.0217568
			-0.29547	-0.0782123		-0.125858	-0.0303353		-0.193227	-0.0407313		-0.355043	-0.0415424		-0.135978	-0.0965028		-0.27448	-0.158361		-0.144874	-0.0166805
			-0.172981	-0.0580559		-0.107108	-0.0322464		-0.115656	-0.0306771		-0.205092	-0.0638139		-0.129852	-0.0719555		-0.180947	-0.113335		-0.106622	-0.0151723
			-0.0799245	-0.0326008		-0.0477191	-0.0169336		-0.0743445	-0.0143097		-0.122979	-0.0474502		-0.0793305	-0.0433447		-0.108639	-0.0720323		-0.0567584	-0.0101979
			-0.0268842	-0.0157341		-0.0129257	-0.00687021		-0.0245262	-0.00514402		-0.0625207	-0.0252255		-0.0344493	-0.0219764		-0.0423872	-0.0349233		-0.0149892	-0.00438305
			0.0245652	0.00422004		0.0158703	0.00232232		0.0119453	-0.00179261		0.00830353	-0.00318835		-0.00339641	-0.00243261		0.0085001	-0.00144097		0.0149606	0.000294278
			0.084522	0.0229338		0.049343	0.00907158		0.0734482	0.00241613		0.131825	0.026679		0.0257157	0.0186039		0.0669646	0.0303251		0.0515184	0.00655335
			0.159404	0.0593368		0.077208	0.0287388		0.169646	0.00455168		0.24281	0.0538269		0.0709001	0.0338078		0.133719	0.0620589		0.101694	0.0136132
			0.224268	0.108049		0.116223	0.0543327		0.235402	0.00927482		0.387768	0.0965883		0.112385	0.0481546		0.200975	0.116152		0.152034	0.0296541
			0.27627	0.155022		0.188862	0.0823215		0.374117	0.0119715		0.692176	0.141507		0.189107	0.0735312		0.278835	0.162085		0.225368	0.0451009
			0.410894	0.260253		0.254422	0.161522		0.50752	0.0204046		0.707426	0.198522		0.25182	0.103524		0.364257	0.196927		0.313226	0.0826157
			0.465363	0.367116		0.351722	0.210049		0.516711	0.0259383		1.09351	0.267259		0.344493	0.129592		0.511576	0.304692		0.441098	0.118501
			0.617122	0.524727		0.459047	0.363418		0.653847	0.0456882		0.91751	0.320991		0.502486	0.174263		0.633735	0.360096		0.513702	0.206082
			0.726535	0.765027		0.600082	0.385456		0.73541	0.0538407		1.22648	0.417861		0.524988	0.195604		0.759407	0.521469		0.674568	0.301242
			0.961211	1.17885		0.810553	0.629082		0.710623	0.0555398		1.32373	0.45026		0.881064	0.245112		0.799803	0.585794		0.843737	0.410538
			1	1.64633		1	1.02801		1	0.0678075		1	0.488848		1	0.361379		1	0.783401		1	0.600503
			mean		SEM
			CBD	control	CBD	control	VOLT
			-0.453735	-0.165042	0.0744224	0.0552941	-100
			-0.431134	-0.159587	0.0680689	0.0581218	-90
			-0.438654	-0.132003	0.0703793	0.0437492	-80
			-0.38089	-0.108016	0.0700824	0.0356332	-70
			-0.331491	-0.097028	0.0703372	0.0286238	-60
			-0.299882	-0.0883954	0.0489741	0.0251415	-50
			-0.217847	-0.0660522	0.0342091	0.0186133	-40
			-0.145465	-0.0550365	0.0151844	0.0124145	-30
			-0.081385	-0.0338385	0.0100814	0.00839781	-20
			-0.0312404	-0.0163224	0.00650382	0.00440352	-10
			0.0115355	-0.000288272	0.00324802	0.00102446	0
			0.0690482	0.0166547	0.012703	0.00406165	10
			0.136483	0.036562	0.0228677	0.00857315	20
			0.204151	0.0660293	0.0358486	0.0155933	30
			0.31782	0.095934	0.0669581	0.0219659	40
			0.401366	0.146253	0.0613605	0.030954	50
			0.532068	0.203307	0.0971388	0.0450748	60
			0.613921	0.285038	0.0578608	0.0590226	70
			0.749638	0.377214	0.0854508	0.0867746	80
			0.904389	0.507882	0.0756854	0.134289	90
			1	0.710897	2.97072e-07	0.193838	100
