# Supplementary material for: Cannabidiol sensitizes TRPV2 channels to activation by 2-APB
Source: eLife. 2023 May 18;12:e86166. doi: 10.7554/eLife.86166 (PMC10195083; doi:10.7554/eLife.86166)
Supplement: Figure 4—source data 2. [file elife-86166-fig4-data2.xlsx]

## Sheet: Sheet1
WT rTRPV1
whole-cell; -80 mV		raw						subtracted					norm to 50uM 2APB
gap-free		control	50uM 2APB	10uM CBD	CBD+2APB	Caps		50uM 2APB	10uM CBD	CBD+2APB	Caps		50uM 2APB	10uM CBD	CBD+2APB	Caps		1	1	1	1	1	1
		-55.2109	-60.9122	-52.9225	-111.364	-3276.9		-5.7013	2.2884	-56.1531	-3221.69		1	-0.401382	9.84917	565.08		-0.401382	0.153383	0.775229	0.0989794	0.132629	0.0870771
50 uM 2APB		-12.5513	-524.895	-91.1363	-2572.35	-17845.6		-512.344	-78.585	-2559.8	-17833		1	0.153383	4.99625	34.8068		9.84917	4.99625	5.76932	5.64079	6.41433	4.02138
10 or 40 uM CBD		-303.357	-384.355	-366.149	-770.66	-6938.06		-80.998	-62.792	-467.303	-6634.7		1	0.775229	5.76932	81.9119		565.08	34.8068	81.9119	165.331	205.642	122.176
10 uM capsaicin		-9.13914	-97.0651	-17.842	-505.111	-14546		-87.926	-8.70286	-495.972	-14536.9		1	0.0989794	5.64079	165.331
		-14.7008	-127.792	-29.7	-740.105	-23271		-113.091	-14.9992	-725.404	-23256.3		1	0.132629	6.41433	205.642		1	0
		-15.9725	-373.086	-47.0689	-1452.06	-43646.5		-357.113	-31.0964	-1436.09	-43630.5		1	0.0870771	4.02138	122.176		0.140986	0.152897
																		6.11521	0.81676
													1	0.140986	6.11521	195.824	mean	195.824	77.8252
													0	0.152897	0.81676	77.8252	sem
		raw						subtracted					norm to 50uM 2APB
		control	50uM 2APB	40uM CBD	CBD+2APB	Caps		50uM 2APB	40uM CBD	CBD+2APB	Caps		50uM 2APB	40uM CBD	CBD+2APB	Caps
		-8.87663	-561.711	-117.537	-4053.62	-23295.7		-552.834	-108.66	-4044.74	-23286.8		1	0.196551	7.31637	42.1226		1	0
		-228.096	-308.872	-252.4	-630.446	-3684.31		-80.776	-24.304	-402.35	-3456.21		1	0.300881	4.98106	42.7876		0.302856	0.0787747
		-62.7036	-92.8933	-80.3445	-330.369	-4251.1		-30.1897	-17.6409	-267.665	-4188.4		1	0.584335	8.86612	138.736		7.01006	0.651677
		-5.25521	-97.8745	-34.2104	-707.98	-7540.93		-92.6193	-28.9552	-702.725	-7535.67		1	0.312626	7.58724	81.3618		72.1042	18.1096
		-4.23427	-81.102	-13.4495	-488.462	-4271.39		-76.8677	-9.21523	-484.228	-4267.16		1	0.119884	6.29949	55.513
													1	0.302856	7.01006	72.1042	mean
													0	0.0787747	0.651677	18.1096	sem
