# Supplementary material for: Cannabidiol sensitizes TRPV2 channels to activation by 2-APB
Source: eLife. 2023 May 18;12:e86166. doi: 10.7554/eLife.86166 (PMC10195083; doi:10.7554/eLife.86166)
Supplement: Figure 4—source data 3. [file elife-86166-fig4-data3.xlsx]

## Sheet: group analysis of sens
mTRPV3; whole-cell
pre-sensitization experiment:
		leak-subtracted:
60uM 2APB	I1		-42.8596	-555.957	-541.629	-45.3864	-11.313	-5.8331	-125.977	-177.477	-54.4436	-201.168
60 uM 2APB	I2		-61.997	-827.741	-610.867	-43.5004	-26.0373	-16.6125	-107.184	-129.929	-59.6299	-255.609
60 uM 2APB+10uM CBD	I2APB+CBD		-1041.04	-8244.74	-4818.92	-1160.36	-335.793	-382.251	-981.646	-667.377	-423.878	-1819.03
														mean	sem
		normalized to I1:	1	1	1	1	1	1	1	1	1	1		1	0
			1.44651	1.48886	1.12783	0.958446	2.30154	2.84798	0.850824	0.732089	1.09526	1.27062		1.412	0.211985
			24.2896	14.8298	8.89709	25.5662	29.682	65.5314	7.79226	3.76036	7.78563	9.04231		19.7177	5.81899
													paired t-tests (raw data):
												I1 vs I2	0.211583		I2 vs I3	0.0370146
													(norm data):
													0.0838348
post-sensitization experiment:		leak-subtracted:
			-107.828	-8.00834	-40.5513	-94.9369	-358.145	-9.03959	-4.21092	-5.36731
			-320.949	-81.467	-152.898	-41.3048	-772.947	-47.9335	-89.0644	-18.6413
			-4652.59	-1169.62	-688.826	-592.305	-2219.45	-445.161	-1003.81	-388.834
		normalized to I1:												mean	sem
			1	1	1	1	1	1	1	1				1	0
			2.97648	10.1728	3.77048	0.435076	2.15819	5.30262	21.1508	3.47311				6.17995	2.36573
			43.1482	146.05	16.9865	6.23893	6.19708	49.2457	238.382	72.4448				72.3366	28.7218
													paired t-tests
														0.0645583	I1 vs I2
														0.0362071	I2 vs I3

## Sheet: time courses-adjusted
WT mTRPV3, whole cell, -80mV
60uM2APB			2APB+CBD, sens						mean	SEM				2APB,sens						mean	SEM		2APB+CBD						mean	sem			2APB						mean	SEM
10uM CBD		0											0										-0.210032	-0.754499	-0.742438	-0.0520405	-0.147473		-0.381296	0.152006		0	-0.0655562	-0.100529	-0.0365755	-0.00609454	0.51321		0.060891	0.114154		0.0233331
		0.0233333											0.0233333										-3.32147	-4.38677	-4.7276	-2.39801	-1.02108		-3.17099	0.676143		0.0233333	-0.216383	-0.165803	-0.160311	-0.07311	0.521721		-0.0187772	0.137074
3mM 2APB (sens)		0.0466667											0.0466667										-7.44438	-9.28631	-9.52158	-5.6075	-1.94869		-6.7617	1.3956		0.0466667	-0.421329	-0.415027	-0.271405	-0.164845	0.386174		-0.177286	0.148758
		0.07											0.07										-13.4209	-14.4415	-13.7929	-8.37754	-2.6104		-10.5286	2.25451		0.07	-0.631575	-0.688861	-0.529923	-0.238824	-0.182776		-0.454392	0.103034
		0.0933333											0.0933333										-19.7116	-19.6007	-18.5378	-10.8313	-3.01152		-14.3386	3.27715		0.0933333	-0.892545	-0.920915	-0.677252	-0.416354	-0.828604		-0.747134	0.0928117
		0.116667											0.116667										-25.3662	-24.1731	-22.9969	-12.8156	-3.31034		-17.7324	4.24053		0.116667	-1.07649	-0.988362	-0.823017	-0.539631	-0.89745		-0.864989	0.0918217
		0.14											0.14										-30.7431	-28.7068	-27.3705	-15.5094	-3.59823		-21.1856	5.13664		0.14	-1.29453	-1.51178	-1.03644	-0.674665	-0.269099		-0.957302	0.221465
		0.163333											0.163333										-35.1171	-33.4579	-30.6863	-17.6847	-3.92709		-24.1746	5.91777		0.163333	-1.53723	-1.72858	-1.25798	-0.926453	-0.454171		-1.18088	0.226467
		0.186667											0.186667										-38.8716	-37.2052	-33.6308	-19.2658	-4.14362		-26.6234	6.59762		0.186667	-1.65146	-2.06311	-1.54839	-0.9228	-1.13912		-1.46498	0.199955
		0.21											0.21										-42.8707	-40.8516	-34.8767	-20.4723	-4.15957		-28.6461	7.2682		0.21	-1.80015	-2.3519	-1.89042	-1.00681	-1.66526		-1.74291	0.21723
		0.233333											0.233333										-46.4419	-44.5648	-35.1708	-19.6183	-4.17406		-29.994	8.01238		0.233333	-1.86247	-3.14345	-1.8818	-1.18392	-0.873067		-1.78894	0.390744
		0.256667											0.256667										-49.1569	-46.6799	-36.1241	-20.1956	-4.16429		-31.2642	8.48036		0.256667	-2.13437	-3.21271	-2.26127	-1.36014	-1.19572		-2.03284	0.361101
		0.28											0.28										-52.2046	-47.8154	-37.5275	-20.9221	-4.26699		-32.5473	8.88608		0.28	-2.1891	-3.48925	-2.46102	-1.50327	-2.10643		-2.34982	0.324991
		0.303333											0.303333										-55.1203	-48.7816	-36.7844	-21.8311	-4.21551		-33.3466	9.23412		0.303333	-2.21564	-3.63762	-2.68298	-1.54921	-1.41256		-2.2996	0.405848
		0.326667											0.326667										-57.8018	-51.5076	-34.8146	-22.5764	-4.16298		-34.1727	9.73218		0.326667	-2.3821	-3.8862	-2.43734	-1.60048	-2.537		-2.56863	0.369211
		0.35											0.35										-60.0157	-52.6602	-35.0479	-23.0659	-4.09023		-34.976	10.0884		0.35	-2.60876	-4.32941	-2.71038	-1.58353	-2.54316		-2.75505	0.442683
		0.373333											0.373333										-62.2085	-53.9928	-34.4361	-22.5628	-4.07731		-35.4555	10.5148		0.373333	-2.86999	-4.29035	-2.95719	-1.77456	-3.23709		-3.02584	0.402387
		0.396667											0.396667										-64.4398	-56.9416	-33.3487	-22.2649	-3.99619		-36.1983	11.1065		0.396667	-2.80335	-5.0341	-2.99016	-1.91745	-4.32841		-3.4147	0.559153
		0.42											0.42										-65.3383	-60.0422	-32.2961	-22.6042	-4.05156		-36.8665	11.5084		0.42	-3.01622	-5.02783	-3.04738	-2.07705	-2.82005		-3.19771	0.49007
		0.443333											0.443333										-66.8028	-59.5839		-21.9452	-4.28883		-38.1552	14.971		0.443333	-3.11362	-5.29512	-3.33348	-1.97028	-3.59028		-3.46056	0.535718
		0.466667											0.466667										-67.8232	-59.4836		-21.7775	-4.41286		-38.3743	15.1153		0.466667	-3.2634	-5.35912	-3.6541	-2.20317	-3.04471		-3.5049	0.520816
		0.49											0.49										-68.7063	-59.5321		-21.2137	-4.32692		-38.4448	15.3334		0.49	-3.24432	-6.15683	-4.13354	-2.17996	-5.78856		-4.30064	0.751676
		0.513333											0.513333										-68.8461	-59.4506			-4.24235		-44.1797	20.152		0.513333	-3.27698	-6.55546	-4.03405	-2.16189	-4.87334		-4.18034	0.742734
		0.536667											0.536667										-68.3166	-60.3551			-4.15184		-44.2745	20.1926		0.536667	-3.42576	-6.83021	-3.98636	-2.30151	-5.5868		-4.42613	0.80109
		0.56											0.56										-68.354	-60.004			-3.89167		-44.0832	20.2398		0.56	-3.35784	-7.01505	-4.10917	-2.3853	-4.39101		-4.25167	0.77325
		0.583333											0.583333										-69.5335	-60.0173			-3.85721		-44.4694	20.491		0.583333	-3.59068	-7.85736	-3.94058	-2.34961	-5.02831		-4.55331	0.930075
		0.606667											0.606667										-70.215	-58.7946			-4.02393		-44.3445	20.4281		0.606667	-3.92955	-7.67316	-4.25371	-2.4517	-4.38342		-4.53831	0.856061
		0.63											0.63										-69.961	-58.782								0.63	-3.82933	-7.99363	-4.11947	-2.404	-4.53821		-4.57693	0.926421
		0.653333											0.653333										-69.6643	-57.7445								0.653333	-3.76564	-8.42494	-4.54548	-2.41936	-6.65958		-5.163	1.06634
		0.676667											0.676667										-69.3751	-56.4797								0.676667	-4.10209	-8.19638	-4.57002	-2.37808	-5.99894		-5.0491	0.976428
		0.7											0.7										-68.2016	-55.6464								0.7	-3.97982	-8.09064	-4.78353	-2.41901	-4.64729		-4.78406	0.927159
		0.723333											0.723333											-54.812								0.723333	-4.11848	-8.44318	-5.00361	-2.45018	-6.43124		-5.28934	1.01892
		0.746667											0.746667																			0.746667	-4.10839	-8.76595	-5.20311	-2.28115	-7.37001		-5.54572	1.15193
		0.77											0.77																			0.77	-4.21405	-8.53102	-5.15704	-2.71372	-7.13515		-5.55019	1.03399
		0.793333											0.793333																			0.793333	-4.38616	-8.35145	-5.38807	-2.48993	-8.31285		-5.78569	1.13905
		0.816667											0.816667																			0.816667	-4.33252	-8.67275	-5.18313	-2.42359	-9.73951		-6.0703	1.36641
		0.84											0.84																			0.84	-4.48141	-9.32267	-5.47118	-2.35709	-8.74055		-6.07458	1.3111
		0.863333											0.863333																			0.863333	-4.54213	-9.86681	-4.97241	-2.31908	-7.58089		-5.85626	1.30535
		0.886667											0.886667																			0.886667	-4.61107	-9.76269	-5.43488	-2.50136	-10.9465		-6.65131	1.59678
		0.91											0.91																			0.91	-4.77243	-9.4264	-5.26868	-2.60525	-10.8416		-6.58288	1.53377
		0.933333											0.933333																			0.933333	-4.95679	-10.6772	-5.38196	-2.62916	-10.1445		-6.75792	1.56546
		0.956667											0.956667																			0.956667	-4.88138	-10.8607	-5.61471	-2.57743	-9.5016		-6.68715	1.52709
		0.98											0.98																			0.98	-5.07831	-11.4014	-5.62962	-2.57234	-8.38253		-6.61284	1.51177
		1.00333											1.00333																			1.00333	-5.12609	-11.0991	-5.84134	-2.46739	-7.98794		-6.50437	1.44825
		1.02667											1.02667																			1.02667	-5.40153	-10.9676	-5.75832	-2.43693	-8.22812		-6.55851	1.43517
		1.05											1.05																			1.05	-5.60458	-11.132	-5.75094	-2.45102	-10.1455		-7.01682	1.59949
		1.07333											1.07333																			1.07333	-5.30595	-12.0696	-5.74662	-2.38176	-10.4432		-7.18944	1.77688
		1.09667											1.09667																			1.09667	-5.55483	-11.4905	-6.0787	-2.54398	-12.2073		-7.57506	1.8496
		1.12											1.12																			1.12	-5.86152	-12.1833	-5.76872	-2.52834	-11.8807		-7.64453	1.8897
		1.14333											1.14333																			1.14333	-5.66183	-12.5917	-5.79497	-2.41753	-9.62479		-7.21817	1.76297
		1.16667											1.16667																			1.16667	-5.94948	-12.7938	-6.0345	-2.64194	-11.7776		-7.83945	1.92221
		1.19											1.19																			1.19	-5.95007	-13.2734	-6.50935	-2.62785	-12.1577		-8.10367	2.00407
		1.21333				-2.60652							1.21333																			1.21333	-6.03351	-13.0905	-6.29123	-2.56599	-10.8137		-7.75899	1.86889
		1.23667				-8.51392							1.23667																			1.23667	-6.08163	-13.7671	-6.43059	-2.62944	-11.8381		-8.14936	2.03549
		1.26				-15.9533							1.26					0.459695														1.26	-6.01693	-14.8454	-6.14483	-2.58107	-11.3217		-8.18197	2.17332
		1.28333				-23.6392							1.28333					-1.3321														1.28333	-6.14043	-14.0837	-6.39627	-2.63302	-14.332		-8.71708	2.33847
		1.30667				-29.8218							1.30667					-3.57161														1.30667	-6.23783	-13.8384	-6.46122	-2.72577	-14.7112		-8.79489	2.33729
		1.33				-34.2154							1.33					-6.23263														1.33	-6.13446	-13.7385	-6.40677	-2.75227	-12.5468		-8.31576	2.08162
		1.35333				-38.018							1.35333					-10.5378														1.35333	-6.42183	-14.1944	-6.34208	-2.88337	-12.8233		-8.53299	2.14048
		1.37667				-42.0294							1.37667					-13.9998														1.37667	-6.54298	-14.473	-6.38151	-2.9758	-13.3985		-8.75436	2.21566
		1.4				-45.5678							1.4					-18.2495														1.4	-6.59026	-14.4028	-6.65531	-2.87047	-13.368		-8.77736	2.2011
		1.42333				-48.5209							1.42333					-20.827														1.42333	-6.64756	-14.6635	-6.67419	-2.7162	-11.6143		-8.46315	2.0964
		1.44667				-50.227							1.44667					-22.8686														1.44667	-6.78019	-14.9948	-6.8015	-2.78486	-12.4176		-8.7558	2.18757
		1.47				-50.7202							1.47					-26.3606														1.47	-6.99097	-14.5628	-6.58442	-3.04099	-13.2643		-8.8887	2.17311
		1.49333				-52.8622							1.49333					-28.2305														1.49333	-7.01631	-10.5821	-6.7818	-2.52203	-8.87126		-7.1547	1.34747
		1.51667				-53.6743							1.51667					-31.0691														1.51667	-6.94596	-0.311671	-0.340264	-0.134041	3.01284		-0.943818	1.62942
		1.54				-54.3723							1.54					-33.5228														1.54	-7.12659	-0.238894	-0.816082	-1.20625	-8.73703		-3.62497	1.78326
		1.56333				-54.764							1.56333					-35.828														1.56333	-7.19157	-6.02386	-4.01436	-2.15657	-11.8114		-6.23955	1.63738
		1.58667				-53.5325							1.58667					-37.4095														1.58667	-7.49742	-9.04403	-4.67426	-2.54934	-11.2357		-7.00016	1.54247
		1.61				-52.1547							1.61					-39.5261														1.61	-7.42368	-9.8467	-5.18505	-2.4428	-10.7136		-7.12236	1.51758
		1.63333				-50.834							1.63333					-43.0531														1.63333	-7.65809	-11.4097	-5.27867	-2.563	-13.4398		-8.06986	1.97835
		1.65667				-50.4621							1.65667					-43.6237														1.65667	-7.77593	-12.449	-5.59014	-2.50047	-14.7768		-8.61848	2.23505
		1.68				-51.7586							1.68				-0.321967	-43.1512														1.68	-8.03508	-13.7265	-5.39114	-2.55949	-13.5604		-8.65452	2.21332
		1.70333				-49.2404							1.70333				-0.8466	-45.3438														1.70333	-8.00092	-15.007	-5.99962	-2.82741	-14.4089		-9.24878	2.37837
		1.72667				-48.1041							1.72667				-2.5143	-48.5532														1.72667	-7.77691	-14.923	-6.00112	-2.83078	-14.0002		-9.10641	2.32998
		1.75				-46.3304							1.75				-5.21367	-47.5384														1.75	-7.96104	-15.3335	-6.11764	-3.05101	-13.9456		-9.28175	2.33402
		1.77333				-44.8744							1.77333				-6.53663	-49.419														1.77333	-8.08693	-16.0952	-6.28938	-3.10508	-16.2967		-9.97465	2.66237
		1.79667											1.79667				-9.18147	-49.7436														1.79667	-8.28205	-16.6364	-6.57547	-3.04105	-16.9453		-10.2961	2.7834
		1.82											1.82				-11.8051	-51.4978														1.82	-8.29017	-17.3871	-6.92014	-3.23844	-17.1761		-10.6024	2.84939
		1.84333											1.84333				-11.7061	-55.43														1.84333	-8.54042	-17.3157	-6.92274	-3.22409	-17.6679		-10.7342	2.8908
		1.86667											1.86667				-14.7655	-56.6377														1.86667	-8.25214	-17.4685	-7.13818	-3.04269	-17.4653		-10.6734	2.90595
		1.89											1.89				-16.6366	-57.519														1.89	-8.38762	-18.6645	-6.99503	-3.18176	-18.888		-11.2234	3.19925
		1.91333											1.91333				-17.2024	-58.4921														1.91333	-8.45519	-18.3597	-7.55226	-3.36069	-19.9496		-11.5355	3.23689
		1.93667											1.93667				-19.9768	-57.6608														1.93667	-8.70428	-18.7804	-7.73038	-3.40882	-18.2358		-11.3719	3.04784
		1.96											1.96	-3.57213			-21.3644	-58.1095		-27.682	16.0573											1.96	-9.37208	-18.6785	-7.53184	-3.50563	-17.5118		-11.32	2.92997
		1.98333											1.98333	-11.1155			-23.8067	-57.156		-30.6927	13.7295											1.98333	-9.19238	-19.5039	-8.31371	-3.4266	-18.9037		-11.8681	3.15323
		2.00667											2.00667	-18.377			-25.0221	-57.3087		-33.5692	12.0237											2.00667	-9.12437	-19.5848	-8.10637	-3.33883	-21.5628		-12.3434	3.51306
		2.03											2.03	-23.1333			-26.904	-61.4545		-37.1639	12.194											2.03	-8.99348	-21.007	-8.02192	-3.50469	-23.2459		-12.9546	3.87347
		2.05333											2.05333	-25.6521			-28.5006	-60.2213		-38.1247	11.0789											2.05333	-9.35455	-21.2723	-7.89601	-3.39136	-21.0915		-12.6011	3.6385
		2.07667											2.07667	-28.1171			-31.0656	-61.0433		-40.0754	10.5185											2.07667	-9.45118	-21.8102	-8.6503	-3.36494	-24.2641		-13.5081	4.04696
		2.1											2.1	-31.6616			-32.421	-63.8244		-42.6357	10.5966											2.1	-9.56931	-21.7828	-8.30531	-3.13972	-25.658		-13.691	4.27792
		2.12333											2.12333	-32.5397			-34.5631	-63.4983		-43.5337	9.99938											2.12333	-9.7318	-23.6107	-8.95185	-3.38842	-22.23		-13.5825	3.97199
		2.14667											2.14667	-35.1524			-34.7793	-63.0899		-44.3405	9.37531											2.14667	-10.1471	-23.4916	-8.35863	-3.45991	-23.1051		-13.7125	4.06414
		2.17											2.17	-36.4781			-36.2607	-61.5823		-44.7737	8.40454											2.17	-10.536	-23.1623	-8.85973	-3.49352	-25.7964		-14.3696	4.30829
		2.19333											2.19333	-36.1161			-35.5033	-63.277		-44.9655	9.15749											2.19333	-10.6171	-24.0451	-8.38378	-3.52154	-25.692		-14.4519	4.41231
		2.21667											2.21667	-34.6147			-36.3845	-60.202		-43.7337	8.24995											2.21667	-10.9119	-24.8918	-8.86318	-3.4463	-27.2581		-15.0743	4.66875
		2.24											2.24	-35.1967			-37.1301	-60.2185		-44.1818	8.03778											2.24	-10.9906	-24.4367	-8.61603	-3.48723	-23.9834		-14.3028	4.22314
		2.26333											2.26333	-35.8924			-38.0756	-60.4804		-44.8161	7.85744											2.26333	-11.173	-23.9233	-8.80737	-3.31749	-24.8966		-14.4236	4.27424
		2.28667											2.28667	-36.8243			-37.1388	-60.6627		-44.8753	7.89424											2.28667	-11.4107	-25.5224	-8.80565	-3.60901	-23.2484		-14.5192	4.23443
		2.31											2.31	-36.9711			-36.4265	-63.0999		-45.4992	8.80177											2.31	-11.7196	-25.9859	-8.74147	-3.46294	-23.2343		-14.6289	4.30604
		2.33333											2.33333	-36.3883			-38.479	-65.4024		-46.7566	9.34241											2.33333	-12.0106	-27.4815	-8.8267	-3.49207	-23.7309		-15.1084	4.53561
		2.35667											2.35667	-34.9739			-39.0801	-67.3343		-47.1294	10.1717											2.35667	-12.1441	-26.6172	-8.99374	-3.69444	-23.9332		-15.0765	4.39761
		2.38											2.38	-34.7363			-40.7163	-66.3566		-47.2697	9.6983											2.38	-12.4102	-27.5131	-9.03319	-3.70656	-27.8464		-16.1019	4.92639
		2.40333											2.40333	-34.3957			-43.4948	-67.2217		-48.3707	9.78463											2.40333	-12.6016	-27.3704	-9.094	-3.39908	-29.0223		-16.2975	5.08158
		2.42667											2.42667	-33.7875			-44.8599	-67.2195		-48.6223	9.83261											2.42667	-12.7306	-28.2651	-9.43633	-3.55295	-29.3944		-16.6759	5.17812
		2.45											2.45	-32.0737			-47.0279	-66.9768		-48.6928	10.11											2.45	-12.9682	-29.2714	-9.99198	-3.80926	-30.9261		-17.3934	5.3996
		2.47333											2.47333	-32.0413			-45.7875	-68.9193		-48.9161	10.7601											2.47333	-13.0467	-28.9109	-9.70797	-3.68324	-28.2205		-16.7139	5.06704
		2.49667											2.49667	-30.8314			-47.6819	-67.6874		-48.7336	10.6524											2.49667	-13.2758	-15.7561	-9.04418	-2.50102	-11.6685		-10.4491	2.26701
		2.52											2.52	-28.711			-50.0031	-68.3405		-49.0182	11.4507											2.52	-13.5333	0.0319416	-8.5811	-0.367364	-1.26382		-4.74274	2.70233
		2.54333											2.54333	-27.4295			-50.8586	-72.3235		-50.2039	12.9639											2.54333	-13.7046	-1.99719	-0.216181	-2.48463	-19.145		-7.50952	3.75893
		2.56667											2.56667	-29.6265			-48.1915	-73.3497		-50.3892	12.6696											2.56667	-13.8834	-14.0722	-2.99359	-2.85281	-21.3077		-11.0219	3.56706
		2.59											2.59				-49.6263	-72.1274														2.59	-13.954	-17.1204	-6.16626	-3.17918	-22.2254		-12.5291	3.50026
		2.61333											2.61333				-48.5893	-71.8611														2.61333	-14.4243	-19.4265	-6.60542	-3.21369	-21.5012		-13.0342	3.55145
		2.63667											2.63667				-51.0916	-71.8935														2.63667	-14.3287	-21.5313	-7.52657	-3.24893	-24.4923		-14.2256	4.02588
		2.66											2.66				-50.6365	-73.41														2.66		-22.0859	-7.65279	-3.52309	-25.3369		-14.6497	5.34065
		2.68333											2.68333				-52.6251	-71.5085														2.68333		-24.1577	-7.98293	-3.61159	-26.3444		-15.5242	5.70376
		2.70667											2.70667				-52.0655	-74.555														2.70667		-25.5746	-8.29554	-3.83385	-26.3987		-16.0257	5.82507
		2.73											2.73				-51.1434	-78.1133														2.73		-26.3703	-8.72714	-3.81162	-29.1193		-17.0071	6.30511
		2.75333											2.75333				-51.2401															2.75333		-28.9888	-9.18811	-3.71322	-30.1568		-18.0118	6.77191
		2.77667											2.77667				-53.6378															2.77667		-28.0767	-9.14183	-3.57514	-29.761		-17.6387	6.61994
		2.8											2.8																			2.8		-29.2175	-9.17164	-3.59819	-30.3137		-18.0753	6.84829
		2.82333											2.82333																			2.82333		-30.7303	-9.75517	-3.78619	-31.187		-18.8647	7.08858
		2.84667											2.84667																			2.84667		-31.1409	-10.416	-3.85227	-30.603		-19.003	6.98312
		2.87											2.87																			2.87		-32.0265	-9.78313	-3.85202	-34.0451		-19.9267	7.67584
		2.89333		-1.22377									2.89333																			2.89333		-33.1511	-10.1054	-4.0398	-35.1189		-20.6038	7.91994
		2.91667		-3.4041									2.91667																			2.91667		-35.1841	-10.902	-4.21429	-32.254		-20.6386	7.69766
		2.94		-4.4205									2.94				-46.6528	-64.8479														2.94		-36.5086	-11.0074	-4.25495	-34.598		-21.5922	8.18671
		2.96333		-4.97672									2.96333				-47.4993	-67.6163														2.96333		-37.4205	-10.646	-4.38566	-30.0093		-20.6153	7.81798
		2.98667		-5.42944									2.98667				-49.3885	-69.2124														2.98667		-36.3605	-11.4264	-4.3604	-31.6168		-20.941	7.73078
		3.01		-5.76061									3.01				-52.1441	-72.0248														3.01		-36.8429	-11.2739	-4.3893	-34.7006		-21.8017	8.19881
		3.03333		-5.91566									3.03333				-55.45	-72.8166														3.03333		-38.1044	-11.7554	-4.39325	-34.4452		-22.1746	8.31195
		3.05667		-5.98901									3.05667				-55.7885	-75.0976														3.05667		-40.3722	-11.752	-4.29545	-39.2698		-23.9224	9.30714
		3.08		-6.15702									3.08			-0.711366	-55.2656	-75.7952		-43.924	22.4044											3.08		-38.9448	-12.4409	-4.43334	-39.8991		-23.9296	9.09476
		3.10333		-6.30815									3.10333			-3.71885	-55.1508	-75.2908		-44.7202	21.3091											3.10333		-40.0185	-11.8536	-4.30272	-37.5373		-23.428	9.00955
		3.12667		-6.25417									3.12667			-9.46488	-57.3798	-76.8943		-47.913	20.0325											3.12667		-40.9944	-11.9184	-4.37475	-38.7088		-23.9991	9.2928
		3.15		-6.13727									3.15			-13.6163	-57.1072	-77.0004		-49.2413	18.7153											3.15		-42.3294	-12.1781	-4.25053	-40.7572		-24.8788	9.76166
		3.17333		-5.97534									3.17333			-21.0522	-58.9162	-80.3019		-53.4234	17.323											3.17333		-42.4993	-12.6037	-4.29371	-42.3895		-25.4466	9.95926
		3.19667		-5.56557									3.19667			-26.9913	-59.891	-79.1538		-55.3454	15.2286											3.19667		-43.0198	-12.477	-4.12494	-43.8428		-25.8661	10.2849
		3.22											3.22			-33.8709	-61.4455	-83.2735		-59.53	14.2934											3.22		-44.1384	-12.7996	-4.21498	-46.0455		-26.7996	10.7125
		3.24333											3.24333			-38.1406	-60.0798	-81.5255		-59.9153	12.5244											3.24333		-45.4822	-12.6262	-4.29871	-42.1555		-26.1406	10.3694
		3.26667											3.26667			-46.6752	-61.6514	-81.0902		-63.1389	9.96256											3.26667		-46.7872	-13.2084	-4.47304	-43.8393		-27.077	10.6956
		3.29											3.29			-56.5577	-62.2303	-82.1674		-66.9851	7.76575											3.29		-46.4882	-13.1902	-4.54354	-46.7943		-27.7541	11.0466
		3.31333	-6.2656										3.31333			-60.743	-62.525	-84.7203		-69.3294	7.7126											3.31333		-49.2964	-13.4282	-4.73126	-43.1405		-27.6491	10.9394
		3.33667	-22.4186										3.33667			-64.5179	-62.4187	-84.6318		-70.5228	7.08047											3.33667		-50.1559	-13.5671	-4.72319	-45.2857		-28.4329	11.3249
		3.36	-29.9057										3.36			-70.9639	-61.8778	-89.2728		-74.0382	8.05626											3.36		-50.5632	-13.7017	-4.8022	-49.6489		-29.679	11.9341
		3.38333	-35.0024										3.38333		0.234199	-76.8158	-63.4245	-93.3009		-58.3267	20.454											3.38333		-52.3678	-13.7565	-4.4761	-49.8048		-30.1013	12.274
		3.40667	-39.1694				-2.79963						3.40667		-0.997849	-79.2724	-64.1976	-92.1306		-59.1496	20.2068											3.40667		-53.6654	-13.8659	-4.41365	-49.9086		-30.4634	12.485
		3.43	-43.8053				-8.78583						3.43		-2.27313	-85.1787	-64.2994	-92.5562		-61.0769	20.4941											3.43		-55.0801	-13.7569	-3.99304	-47.7546		-30.1461	12.5311
		3.45333	-48.8945				-16.7996						3.45333		-3.37779	-91.2829	-65.3741	-92.6031		-63.1595	20.8898											3.45333		-55.6038	-14.1014	-4.09745	-47.4801		-30.3207	12.5313
		3.47667	-51.5453				-27.6203						3.47667		-4.37978	-97.7562	-65.1908	-92.7787		-65.0264	21.4466											3.47667		-55.6083	-13.7921	-3.9629	-47.4122		-30.1939	12.5812
		3.5	-55.0243				-38.4364						3.5		-4.95492	-100.545	-67.8393	-93.8199		-66.7898	21.7843											3.5		-19.6893	-9.06988	-0.674123	-21.3462		-12.6949	4.84258
		3.52333	-57.0088				-50.7893						3.52333		-5.82083	-103.288	-69.9226	-96.2421		-68.8184	22.1926											3.52333		-0.155446	-0.262376	-0.595547	-6.07028		-1.77091	1.43618
		3.54667	-59.6673				-62.7799						3.54667		-6.63494	-111.295	-68.2891	-98.6328		-71.213	23.3404											3.54667		-25.2081	-6.05295	-2.42273	-36.7664		-17.6126	8.10822
		3.57	-63.0215				-69.0341						3.57		-7.54472	-112.741	-69.4725	-97.0588		-71.7043	23.181											3.57		-34.7816	-9.23432	-2.7554	-36.2155		-20.7467	8.62401
		3.59333	-62.8824				-79.3696						3.59333		-7.90777	-118.399	-70.6353	-98.8644		-73.9516	24.0988											3.59333		-39.6406	-10.6544	-2.98403	-40.0825		-23.3404	9.66657
		3.61667	-63.8413				-82.8609						3.61667		-8.45574	-116.372	-70.5023	-100.363		-73.9233	23.8024											3.61667		-41.778	-11.0134	-2.85845	-41.5765		-24.3066	10.1662
		3.64	-64.9342				-87.2806						3.64		-8.77606	-118.887	-70.2508	-102.044		-74.9893	24.2651											3.64		-44.3444	-12.0445	-2.99784	-40.693		-25.0199	10.2973
		3.66333	-64.918				-91.8675						3.66333		-8.86533	-119.587	-69.2958	-107.656		-76.351	24.9223											3.66333		-46.3012	-12.3229	-2.86287	-40.4605		-25.4869	10.5774
		3.68667	-64.5716				-93.6213						3.68667		-9.86143	-121.348	-70.7023	-109.123		-77.7587	25.0725											3.68667		-48.3201	-12.6688	-2.73292	-43.4505		-26.7931	11.2519
		3.71	-62.9851				-97.2108						3.71		-10.1039	-129.25	-73.66	-110.839		-80.9632	26.2973											3.71		-50.1836	-13.2934	-2.7473	-44.2389		-27.6158	11.5802
		3.73333	-61.0054				-98.3649						3.73333		-10.3423	-130.597	-71.7051	-115.784		-82.1073	26.9936											3.73333		-51.321	-13.9154	-2.77453	-45.5193		-28.3826	11.8494
		3.75667	-60.6398				-99.0192						3.75667		-10.596	-134.048	-73.2104			-72.6182	35.6388											3.75667		-52.87	-13.8495	-2.72324	-44.3547		-28.4494	11.9873
		3.78	-60.1751				-99.9754						3.78		-10.8139	-136.813	-77.2619			-74.9631	36.3911											3.78		-56.1428	-14.773	-2.54625	-46.9449		-30.1017	12.7675
		3.80333	-59.4913				-100.478						3.80333		-11.5661	-143.229	-74.2811			-76.3587	38.022											3.80333		-56.532	-14.8493	-2.25674	-44.2954		-29.4834	12.6045
		3.82667	-56.6884				-99.6926						3.82667		-12.0283	-145.543	-77.0596			-78.2101	38.5465											3.82667		-60.0176	-14.7893	-2.29264	-43.9565		-30.264	13.2118
		3.85					-101.228						3.85		-12.1326	-147.355	-75.5077			-78.3318	39.061											3.85		-62.3167	-15.1315	-2.00992	-51.6163		-32.7686	14.3918
		3.87333			-3.21776		-101.929						3.87333		-12.4906	-148.949	-75.6977			-79.0456	39.4276											3.87333		-61.9348	-15.265	-2.02423	-52.4358		-32.915	14.4019
		3.89667			-11.109		-99.4745						3.89667		-12.2129	-152.536	-76.9154			-80.5547	40.5486											3.89667		-62.9219	-15.3096	-1.91336	-52.6174		-33.1906	14.6041
		3.92			-18.2884		-100.583						3.92		-13.0999	-154.872	-77.1058			-81.6926	40.9903											3.92		-64.4977	-15.7917	-1.93083	-45.1848		-31.8513	14.1324
		3.94333			-24.5676		-98.9949						3.94333		-13.3978	-156.494																3.94333		-69.2454	-16.4359	-1.98198	-47.5399		-33.8008	15.1632
		3.96667			-30.5535		-95.0883						3.96667		-12.9032	-156.442																3.96667		-70.5091	-16.5466	-2.59093	-52.1441		-35.4477	15.6655
		3.99			-35.7033		-93.7847						3.99		-13.2446	-156.965	-71.1353	-94.8713		-84.0541	29.7404											3.99		-71.3143	-16.6102	-2.81477	-49.0774		-34.9542	15.5214
		4.01333			-39.4531		-92.1868						4.01333		-13.4224	-160	-68.861	-91.3083		-83.3979	30.3292											4.01333		-75.0356	-16.822	-3.01298	-49.219		-36.0224	16.2133
		4.03667			-43.1765								4.03667		-13.8362	-156.55	-68.234	-94.5761		-83.2992	29.6437											4.03667		-75.575	-17.3662	-3.3636	-49.5474		-36.463	16.2306
		4.06			-45.389								4.06		-14.2916	-160.242	-73.1796	-100.403		-87.0291	30.3061											4.06		-80.9486	-17.5411	-3.48255	-55.7005		-39.4182	17.7009
		4.08333			-47.7965								4.08333		-14.3184	-172.433	-74.2122	-104.902		-91.4665	32.8959											4.08333		-84.729	-17.3776	-3.91196	-55.2529		-40.3179	18.3645
		4.10667			-51.5772								4.10667		-14.2777	-170.909	-74.0893	-102.959		-90.5588	32.5321											4.10667		-84.6155	-17.905	-3.73585	-59.7527		-41.5023	18.6525
		4.13			-53.9698								4.13		-14.664	-173.39	-72.5804	-108.659		-92.3233	33.2407											4.13		-88.324	-17.9778	-3.94944	-55.4511		-41.4256	19.0404
		4.15333			-56.509								4.15333		-14.7271	-172.261	-75.721	-112.25		-93.7398	33.01											4.15333		-90.511	-18.0512	-4.23808	-59.6872		-43.1219	19.7075
		4.17667			-57.2588								4.17667		-15.2567	-172.582	-75.3988	-111.184		-93.6053	32.9346											4.17667		-94.1156	-19.0446	-4.39727	-52.9678		-42.6313	19.9492
		4.2			-57.5561								4.2		-15.4929	-168.545	-74.7133	-112.78		-92.8827	32.1973											4.2		-100.094	-19.4839	-4.598	-51.979		-44.0387	21.1419
		4.22333			-58.6958								4.22333		-15.4478	-176.02	-75.2757	-117.123		-95.9668	33.8718											4.22333		-102.114	-19.3074	-4.70017	-62.5875		-47.1774	22.0541
		4.24667			-59.1266								4.24667		-15.6127	-173.793	-78.7481	-111.834		-94.997	32.9877											4.24667		-101.72	-19.3805	-5.03056	-61.2754		-46.8517	21.837
		4.27			-60.3018								4.27		-15.5846	-174.916	-80.7089	-115.083		-96.5731	33.2805											4.27		-103.565	-20.0351	-5.29861	-63.9548		-48.2133	22.2621
		4.29333			-59.7801								4.29333		-15.4074	-173.066	-81.7001	-118.162		-97.084	33.0723											4.29333		-105.186	-20.1176	-5.25603	-64.7604		-48.8301	22.6438
		4.31667			-59.9069								4.31667		-15.8675	-176.566	-83.578	-119.425		-98.8589	33.6432											4.31667		-108.733	-20.3765	-5.61531	-69.7806		-51.1263	23.5996
		4.34			-61.2535								4.34		-15.9348	-178.069	-85.9704	-124.259		-101.058	34.0863											4.34		-110.762	-19.8821	-5.52175	-65.2768		-50.3607	23.8228
		4.36333			-60.0168								4.36333		-16.2168	-179.386	-82.1129	-120.915		-99.6577	34.2524											4.36333		-114.939	-20.1624	-5.87308	-68.6549		-52.4074	24.7982
		4.38667			-60.1604								4.38667		-16.4247	-186.575	-83.6458	-124.084		-102.682	35.7057											4.38667		-119.641	-20.6374	-5.54287	-68.6552		-53.6191	25.7942
		4.41			-59.9314								4.41		-16.6173	-192.337	-81.6781	-124.592		-103.806	36.9248											4.41		-119.794	-20.5514	-5.61498	-66.8528		-53.2033	25.7414
		4.43333			-63.245								4.43333		-16.5703	-192.637	-81.5829	-130.948		-105.434	37.3284											4.43333		-122.65	-20.3892	-5.8624	-66.7057		-53.9018	26.333
		4.45667			-70.959								4.45667		-15.8677	-198.349	-82.9476	-132.474		-107.41	38.5968											4.45667		-128.725	-20.8376	-5.53736	-71.7419		-56.7103	27.865
		4.48			-66.1351								4.48		-15.7295	-192.718	-83.3978	-136.227		-107.018	37.7373											4.48		-134.829	-20.883	-5.82313	-68.4855		-57.5051	29.0284
		4.50333											4.50333		-15.8776	-194.341	-83.3133	-137.632		-107.791	38.1101											4.50333			-11.1662	-1.64438	-28.9538		-13.9214	8.00301
		4.52667											4.52667		-16.4717	-190.448	-82.4408	-143.439		-108.2	37.7317											4.52667			-0.764246	-4.87909	-8.137		-4.59345	2.13312
		4.55											4.55		-16.4329	-193.417	-82.4935	-147.667		-110.003	38.6098											4.55			-10.0269	-5.48631	-45.5727		-20.362	12.6733
		4.57333											4.57333		-16.4492	-193.389	-84.6286	-147.135		-110.401	38.4357											4.57333			-13.9441	-5.51504	-48.1965		-22.5519	13.0511
		4.59667											4.59667		-16.6485	-204.631	-86.7597	-148.767		-114.202	40.4578											4.59667			-15.5302	-5.31789	-51.6988		-24.1823	14.0705
		4.62											4.62		-16.512	-200.922	-83.4254	-154.236		-113.774	40.4277											4.62			-15.7942	-5.71204	-51.402		-24.3028	13.8587
		4.64333											4.64333		-16.7051	-203.792	-85.6698	-156.626		-115.698	40.9643											4.64333			-16.9468	-5.76964	-53.8493		-25.5219	14.5266
		4.66667											4.66667		-16.5331	-208.333	-88.6928	-161.833		-118.848	42.0644											4.66667			-18.2399	-5.83578	-57.0311		-27.0356	15.4193
		4.69											4.69		-16.4673	-208.84	-88.4458	-162.197		-118.988	42.2135											4.69			-18.5915	-5.87199	-59.6512		-28.0382	16.2273
		4.71333											4.71333		-16.2196	-211.499	-89.1503	-167.187		-121.014	43.1245											4.71333			-18.4694	-5.97782	-67.1332		-30.5268	18.655
		4.73667											4.73667		-16.3514	-203.677	-88.5362	-171.307		-119.968	42.1971											4.73667			-18.6679	-6.60859	-69.7814		-31.686	19.3632
		4.76											4.76		-16.8781	-200.541	-91.2085			-102.876	53.3389											4.76			-19.7874	-6.50683	-64.6084		-30.3009	17.577
		4.78333											4.78333		-16.9827	-203.331	-93.0644			-104.459	54.0949											4.78333			-19.6364	-6.7445	-76.9716		-34.4508	21.5836
		4.80667											4.80667		-17.4286	-208.884	-93.4326			-106.582	55.658											4.80667			-21.1262	-7.13912	-79.4427		-35.9027	22.1413
		4.83											4.83		-17.4112	-206.233	-91.1749	-133.103		-111.981	39.4821											4.83			-21.9281	-7.08459	-77.4385		-35.4837	21.4106
		4.85333											4.85333		-17.6668	-208.565	-94.2265	-149.016		-117.369	40.6145											4.85333			-22.5891	-7.311	-73.3898		-34.43	19.973
		4.87667											4.87667		-17.9071	-211.596	-96.4307	-165.257		-122.798	42.2149											4.87667			-22.9283	-7.21991	-73.0735		-34.4072	19.8578
		4.9											4.9		-17.8609	-216.745	-98.5103			-111.039	57.7536											4.9			-23.4321	-7.25679	-76.788		-35.8256	21.0067
		4.92333											4.92333		-17.4336	-218.988	-97.7061			-111.376	58.5838											4.92333			-22.4059	-7.34769	-78.0252		-35.9263	21.4936
		4.94667											4.94667		-17.4695	-216.014	-96.8737			-110.119	57.6963											4.94667			-23.118	-7.33711	-81.6571		-37.3707	22.6069
		4.97											4.97		-18.0697	-214.743	-94.0086			-108.94	57.2635											4.97			-23.8918	-7.3458	-85.3514		-38.863	23.7299
		4.99333											4.99333		-17.7891	-217.005	-94.3434			-109.712	58.0198											4.99333			-24.4809	-7.41255	-83.0778		-38.3238	22.9131
		5.01667											5.01667		-17.9302	-215.202																5.01667			-25.1142	-7.32727	-90.962		-41.1345	25.4374
		5.04											5.04		-18.0922	-222.033																5.04			-25.3396	-7.81036	-86.1076		-39.7525	23.7235
		5.06333											5.06333		-18.4167	-225.108																5.06333			-25.7475	-7.66245	-93.5373		-42.3157	26.1375
		5.08667											5.08667		-18.8918	-231.389	-87.4149			-112.565	62.6182											5.08667			-25.0356	-8.00498	-89.4254		-40.822	24.794
		5.11											5.11		-18.3804	-229.798	-88.9334			-112.371	62.1458											5.11			-25.369	-8.1188	-87.7961		-40.428	24.2019
		5.13333											5.13333		-18.5069	-229.881	-90.0946			-112.828	62.0682											5.13333			-26.6347	-8.40143	-87.6873		-40.9078	23.9747
		5.15667											5.15667		-18.659	-233.489	-89.1926			-113.78	63.223											5.15667			-26.7644	-8.494	-83.4484		-39.5689	22.5648
		5.18											5.18		-18.2811	-230.218	-92.1349			-113.545	62.1105											5.18			-27.404	-8.34165	-87.5738		-41.1065	23.8764
		5.20333											5.20333		-18.6227	-236.327	-94.302			-116.417	63.8112											5.20333			-27.3312	-8.3552	-93.7		-43.1288	25.8722
		5.22667											5.22667		-18.926	-239.26	-95.1145			-117.767	64.6056											5.22667			-27.3107	-8.41117	-94.4577		-43.3932	26.1087
		5.25											5.25		-18.7171	-242.137	-96.2097			-119.021	65.4966											5.25			-27.4115	-8.53812	-92.8235		-42.9244	25.5375
		5.27333											5.27333		-18.7508	-245.591	-97.092			-120.478	66.5188											5.27333			-27.6405	-8.48496	-94.9174		-43.681	26.2082
		5.29667											5.29667		-19.0148	-244.004	-100.92			-121.313	65.7444											5.29667			-27.2344	-8.84512	-98.7213		-44.9336	27.4128
		5.32											5.32		-19.1962	-239.429	-100.231			-119.619	64.3104											5.32			-28.0124	-8.51326	-97.1132		-44.5463	26.8795
		5.34333											5.34333		-18.6687	-239.943	-101.767			-120.126	64.5327											5.34333			-27.3671	-8.98137	-98.216		-44.8548	27.2034
		5.36667											5.36667		-19.0173	-242.463	-101.058			-120.846	65.2577											5.36667			-28.4505	-9.28996	-103.189		-46.9765	28.6454
		5.39											5.39		-19.3907	-246.218	-101.941			-122.516	66.2827											5.39			-28.3992	-8.80629	-101.383		-46.196	28.167
		5.41333											5.41333		-19.1231	-248.786	-103.125			-123.678	67.0896											5.41333			-29.9251	-8.85726	-98.7631		-45.8485	27.1473
		5.43667											5.43667		-19.133		-104.265															5.43667			-29.5554	-9.18524	-99.3497		-46.0301	27.3006
		5.46											5.46		-19.1942		-103.783															5.46			-29.8638	-9.12202	-99.8002		-46.262	27.4306
		5.48333											5.48333		-18.9918		-106.135															5.48333			-30.6323	-8.36589	-99.8035		-46.2672	27.529
		5.50667											5.50667		-19.4162		-106.046															5.50667			-30.1442	-0.605448	-16.4822		-15.7439	8.53508
		5.53											5.53		-19.6532		-111.53															5.53			-30.2888	-6.84294	-28.1154		-21.749	7.47941
		5.55333											5.55333		-19.1407		-110.437															5.55333			-28.1685	-7.47494	-83.66		-39.7678	22.7446
		5.57667											5.57667		-19.6609	-213.77	-112.135			-115.189	56.0552											5.57667			-4.75571	-7.86569	-88.163		-33.5948	27.2989
		5.6											5.6		-19.6736	-219.739	-110.688			-116.7	57.8322											5.6			-2.55704	-8.12413	-91.784		-34.1551	28.8593
		5.62333											5.62333		-19.9623	-221.359	-111.974			-117.765	58.2103											5.62333			-14.4921	-8.25516	-97.3384		-40.0285	28.7114
		5.64667											5.64667		-19.9277	-227.746	-111.327			-119.667	60.1367											5.64667			-18.8206	-8.2911	-98.8589		-41.9902	28.5964
		5.67											5.67		-19.8603	-234.091	-115.25			-123.067	61.9665											5.67			-20.298	-8.64023	-105.178		-44.7054	30.423
		5.69333											5.69333		-19.6021	-237.542	-117.286			-124.81	63.0261											5.69333			-22.2133	-9.31904	-105.22		-45.5842	30.0494
		5.71667											5.71667		-19.8222	-234.382	-120.001			-124.735	61.9832											5.71667			-24.2078	-9.19916	-102.224		-45.2103	28.8342
		5.74											5.74		-19.9478	-239.655	-122.316			-127.306	63.4731											5.74			-24.4582	-8.74106	-104.73		-45.9765	29.7252
		5.76333											5.76333		-20.0081	-245.561																5.76333			-25.5502	-9.18115	-105.378		-46.7032	29.7157
		5.78667											5.78667		-20.2657	-254.779																5.78667			-25.7024	-9.4194	-110.599		-48.5734	31.3667
		5.81											5.81		-20.4085	-257.614																5.81			-26.9554	-9.80463	-104.417		-47.059	29.1032
		5.83333											5.83333		-20.6004	-257.649																5.83333			-27.3654	-9.69486	-111.676		-49.5789	31.465
		5.85667											5.85667		-20.8846	-256.88																5.85667			-28.6702	-9.9959	-115.278		-51.3147	32.4328
		5.88											5.88		-20.6457	-261.656																5.88			-29.5589	-10.0534	-115.917		-51.843	32.5279
		5.90333											5.90333		-20.3001	-268.957																5.90333			-29.5753	-10.0792	-116.54		-52.0647	32.725
		5.92667											5.92667		-20.4143	-269.865																5.92667			-29.8267	-9.99199	-117.735		-52.5179	33.1075
		5.95											5.95		-20.265	-266.063																5.95			-30.6297	-10.1616	-117.486		-52.759	32.8983
		5.97333											5.97333		-20.3751	-263.755																5.97333			-31.7542	-10.3887	-123.774		-55.3057	34.7854
		5.99667											5.99667		-20.1754	-268.034																5.99667			-31.9042	-10.5087	-120.731		-54.3812	33.7448
		6.02											6.02		-20.1979	-274.217																6.02			-33.1442	-10.5736	-115.738		-53.1521	31.9643
		6.04333											6.04333		-20.2082	-281.614																6.04333			-32.908	-10.436	-117.731		-53.6918	32.6703
		6.06667											6.06667		-20.2562	-281.853																6.06667			-32.8217	-10.7125	-118.421		-53.9852	32.8442
		6.09											6.09		-20.487	-285.646																6.09			-33.2699	-11.0959	-123.343		-55.903	34.3223
		6.11333											6.11333		-20.6466	-292.473																6.11333			-32.8837	-11.3786	-128.347		-57.5364	35.9454
		6.13667											6.13667		-20.3658	-292.107																6.13667			-33.4573	-11.4159	-126.957		-57.2766	35.4163
		6.16											6.16		-20.5871	-295.075																6.16			-33.6412	-11.3702	-127.24		-57.4172	35.4985
		6.18333											6.18333		-20.7052	-293.429																6.18333			-33.5613	-11.2919	-129.555		-58.1362	36.2837
		6.20667											6.20667		-20.8934	-299.085																6.20667			-33.2313	-11.3854	-131.171		-58.596	36.8315
		6.23											6.23		-20.3205	-302.138																6.23			-34.5963	-11.1445	-131.194		-58.9782	36.7369
		6.25333											6.25333		-20.4715	-297.955																6.25333			-34.9621	-10.9668	-131.076		-59.0015	36.6967
		6.27667											6.27667		-20.8362	-296.514																6.27667			-34.8768	-11.5244	-136.66		-61.0205	38.416
		6.3											6.3		-20.807	-301.776																6.3			-33.773	-11.639	-142.294		-62.5686	40.3715
		6.32333											6.32333		-20.8726	-307.908																6.32333			-34.4878	-12.0419	-133.33		-59.9532	37.2561
		6.34667											6.34667		-20.7055	-310.213																6.34667			-34.5576	-12.3751	-139.487		-62.14	39.2002
		6.37											6.37		-20.893	-311.537																6.37			-35.2877	-12.1406	-145.547		-64.325	41.1569
		6.39333											6.39333		-20.8105	-312.282																6.39333			-34.1938	-11.8356	-144.176		-63.402	40.8997
		6.41667											6.41667		-20.6429	-314.963																6.41667			-34.0715	-12.0785	-145.226		-63.7919	41.2089
		6.44											6.44		-20.7999	-312.579																6.44			-32.9804	-12.7353	-148.732		-64.816	42.3632
		6.46333											6.46333		-20.9402	-316.92																6.46333			-33.0762	-12.9968	-151.923		-65.9987	43.3514
		6.48667											6.48667		-21.3237	-318.586																6.48667			-31.9675	-12.5767	-153.967		-66.1703	44.2537
		6.51											6.51		-21.1481																	6.51			-12.1897	-0.608537	-14.394		-9.06407	4.27538
		6.53333											6.53333		-21.1003																	6.53333			0.0363657	-9.11414	-100.119		-36.3988	31.9693
		6.55667											6.55667		-21.4536																	6.55667			-5.90909	-9.87404	-118.833		-44.8721	36.9982
		6.58											6.58		-21.5627	-304.466																6.58			-17.0021	-10.2484	-124.697		-50.6492	37.0753
		6.60333											6.60333		-21.0462	-311.727																6.60333			-20.3192	-10.5058	-129.557		-53.4605	38.1533
		6.62667											6.62667		-21.2255	-317.063																6.62667			-22.5576	-10.4383	-134.845		-55.9469	39.6038
		6.65											6.65		-21.2137	-325.175																6.65			-23.3189	-10.6823	-136.931		-56.9776	40.1431
		6.67333											6.67333		-21.4536	-334.286																6.67333			-23.4454	-10.6133	-136.899		-56.986	40.128
		6.69667											6.69667		-21.6242																	6.69667			-23.9576	-10.6452	-135.603		-56.7354	39.6208
		6.72											6.72		-21.6825																	6.72			-25.4942	-10.4707	-143.038		-59.6676	41.9102
		6.74333											6.74333		-21.7401																	6.74333			-25.5774	-10.4566	-141.894		-59.3092	41.5223
		6.76667											6.76667		-21.4986																	6.76667			-26.291	-10.7923	-142.768		-59.9503	41.6497
		6.79											6.79		-21.9946																	6.79			-26.896	-11.1237	-146.036		-61.352	42.5863
		6.81333											6.81333		-21.8984																	6.81333			-26.7463	-10.936	-147.69		-61.7906	43.1913
		6.83667											6.83667		-21.2218																	6.83667			-25.0598	-10.7488	-144.86		-60.2228	42.5197
		6.86											6.86																			6.86			-26.028	-11.1656	-147.161		-61.4516	43.0691
		6.88333											6.88333																			6.88333			-25.5527	-11.2748	-153.705		-63.5108	45.285
		6.90667											6.90667																			6.90667			-24.634	-11.1141	-161.823		-65.8571	48.1415
		6.93											6.93																			6.93			-24.9881	-10.9796	-164.025		-66.6642	48.848
		6.95333											6.95333																			6.95333			-24.8854	-11.564	-162.03		-66.1599	48.0892
		6.97667											6.97667																			6.97667			-25.3903	-11.3717	-161.627		-66.1296	47.9198
		7											7																			7			-29.052	-11.7652	-171.192		-70.6699	50.5084
		7.02333											7.02333																			7.02333				-11.9462	-171.029
		7.04667											7.04667																			7.04667				-11.8698
		7.07											7.07																			7.07				-11.8814
		7.09333											7.09333																			7.09333				-12.1527
		7.11667											7.11667																			7.11667				-12.1625
		7.14											7.14																			7.14				-12.3343
		7.16333											7.16333																			7.16333				-12.5788
		7.18667											7.18667																			7.18667				-13.0213
		7.21											7.21																			7.21				-12.877
		7.23333											7.23333																			7.23333				-13.4521
		7.25667											7.25667																			7.25667				-13.562
		7.28											7.28																			7.28				-13.3163
		7.30333											7.30333																			7.30333				-13.4871
		7.32667											7.32667																			7.32667				-13.4498
		7.35											7.35																			7.35				-14.1439
		7.37333											7.37333																			7.37333				-14.0806
		7.39667											7.39667																			7.39667				-14.5886
		7.42											7.42																			7.42				-14.8974
		7.44333											7.44333																			7.44333				-14.9676
		7.46667											7.46667																			7.46667				-14.7265
		7.49											7.49																			7.49				-11.8301
		7.51333											7.51333																			7.51333				-1.98123
		7.53667											7.53667																			7.53667				-12.0807
		7.56											7.56																			7.56				-12.8556
		7.58333											7.58333																			7.58333				-13.2919
		7.60667											7.60667																			7.60667				-13.7195
		7.63											7.63																			7.63				-13.9123
		7.65333											7.65333																			7.65333				-14.7919
		7.67667											7.67667																			7.67667				-15.0804
		7.7											7.7																			7.7				-15.6657
		7.72333											7.72333																			7.72333				-15.6818
		7.74667											7.74667																			7.74667				-16.3759
		7.77											7.77																			7.77				-16.3242
		7.79333											7.79333																			7.79333				-16.4776
		7.81667											7.81667																			7.81667				-16.9006
		7.84											7.84																			7.84				-17.3251
		7.86333											7.86333																			7.86333				-17.1771
		7.88667											7.88667																			7.88667				-17.8114
		7.91											7.91																			7.91				-18.2008
		7.93333											7.93333																			7.93333				-18.5695
		7.95667											7.95667																			7.95667
		7.98											7.98																			7.98
		8.00333											8.00333																			8.00333
		8.02667											8.02667																			8.02667
		8.05											8.05																			8.05
		8.07333											8.07333																			8.07333
		8.09667											8.09667																			8.09667
		8.12											8.12																			8.12
		8.14333											8.14333																			8.14333
		8.16667											8.16667																			8.16667
		8.19											8.19																			8.19
		8.21333											8.21333																			8.21333
		8.23667											8.23667																			8.23667
		8.26											8.26																			8.26
		8.28333											8.28333																			8.28333

## Sheet: taus
TAU-activation	in minutes								in seconds
	2APB+CBD	2APB	2APB+CBD_sens	2APB_sens					2APB+CBD	2APB	2APB+CBD_sens	2APB_sens
	0.19839	3872.7	0.151	0.42334		0.140976	0.0234227		11.9034	232362	9.06	25.4004		8.45856	1.40536
	0.18927	3199.7	0.10101	0.66502		6630.26	1111.26		11.3562	191982	6.0606	39.9012		397816	66675.5
	0.1177	11645	0.14757	0.65549		0.106	0.0200644		7.062	698700	8.8542	39.3294		6.36	1.20386
	0.12626	7598.3	0.043462	0.36535		0.433854	0.111148		7.5756	455898	2.60772	21.921		26.0312	6.6689
	0.07326	10978	0.086958	0.060069					4.3956	658680	5.21748	3.60414
	0.140976	7458.74	0.106	0.433854	mean				8.45856	447524	6.36	26.0312	mean
	0.0234227	1745.4	0.0200644	0.111148	sem				1.40536	104724	1.20386	6.6689	sem
TAU-deactivation	2APB+CBD	2APB	2APB+CBD_sens	2APB_sens
	0.027557	0.0022938	0.036408	0.045011
	0.029748	0.0017372	0.049901	0.085299
	0.018283	0.002012	0.051285	0.0025823
	0.024545	0.0015702	0.046414	0.0015855
	0.040143		0.047418	0.003146

## Sheet: taus 2APB pulses
	2-APB (no sensitization)
			tau1 (ms)	tau2 (ms)			tau1	tau2		mean time	mean tau1	mean tau2		sem_time	sem_tau1	sem_tau2
		0	38277	43060		0	38.277	43.06		0	80.4223	86.4502		0	32.6532	34.5483
		90030	592.9	29744		1.5005	0.5929	29.744		1.4989	0.955835	49.171		0.335165	0.492059	21.4243
		148651	728	33612		2.47752	0.728	33.612		2.45979	0.459367	765.671		0.550068	0.13718	656.489
		204681	644.7	16467		3.41135	0.6447	16.467		3.41468	0.44601	2281.57		0.763622	0.12566	2012.33
		262310	695.12	30635		4.37183	0.69512	30.635		4.39148	0.383687	31.7437		1.20268	0.142317	8.93114
		323843	742.51	15252		5.39738	0.74251	15.252		5.37837	0.429423	18068.1		1.47296	0.157175	12081
		377873	734.38			6.29788	0.73438
		0	139990	147920		0	139.99	147.92
		89998	2470.7	110040		1.49997	2.4707	110.04
		146396	337	52535		2.43993	0.337	52.535
		202953	517.35	33267		3.38255	0.51735	33.267
		0	128320	137800		0	128.32	137.8
		89934	217	43757		1.4989	0.217	43.757
		147403	255	2961000		2.45672	0.255	2961
		205401	390	9024700		3.42335	0.39	9024.7
		263334	196.97	26588		4.3889	0.19697	26.588
		320899	388.95	126180		5.34832	0.38895	126.18
		378337	180.55	23738		6.30562	0.18055	23.738
		0	15102	17021		0	15.102	17.021
		89774	542.74	13143		1.49623	0.54274	13.143
		147900	517.47	15536		2.465	0.51747	15.536
		206489	231.99	51843		3.44148	0.23199	51.843
		264823	258.97	38008		4.41372	0.25897	38.008
		323364	156.81	54063000		5.3894	0.15681	54063
		381321	300.08	3660200		6.35535	0.30008	3660.2

## Sheet: 3mM peaks
	2APB				2APB+CBD
	p1	p2	p3		p1	p2	p3				1	0
	-27.357	-26.1079	-16.0225		-221.23	-175.633	-143.142				1.31935	0.407831		1	1	1	1	1
	-66.171	-194.837	-110.4		-2187.16	-1832.25	-1390.2				0.90807	0.206053		0.954341	2.94445	0.77531	0.9624	0.960251
	-43.8461	-33.9943	-22.7831		-127.549	-143.747	-118.108							0.585682	1.6684	0.519615	0.796751	0.969898
	-203.539	-195.886	-162.17		-1704.51	-1646.01	-1460				1	0
	-16.6367	-15.9754	-16.1359		-738.181	-549.768	-370.589				0.893811	0.0688782		1	1	1	1	1
											0.713442	0.0777224		0.793893	0.83773	1.12699	0.965679	0.74476
														0.647028	0.635619	0.925981	0.856551	0.50203
	norm
	1	0.954341	0.585682		1	0.793893	0.647028
	1	2.94445	1.6684		1	0.83773	0.635619
	1	0.77531	0.519615		1	1.12699	0.925981
	1	0.9624	0.796751		1	0.965679	0.856551
	1	0.960251	0.969898		1	0.74476	0.50203
	1	1.31935	0.90807		1	0.893811	0.713442		mean
	0	0.407831	0.206053		0	0.0688782	0.0777224		sem
