# Supplementary material for: Cannabidiol sensitizes TRPV2 channels to activation by 2-APB
Source: eLife. 2023 May 18;12:e86166. doi: 10.7554/eLife.86166 (PMC10195083; doi:10.7554/eLife.86166)
Supplement: Figure 6—figure supplement 1—source data 1. [file elife-86166-fig6-figsupp1-data1.xlsx]

## Sheet: WT rTRPV2
whole-cell		WT rTRPV2
gap-free; -80mV			raw						leak-subtracted & norm
		ctrl	-13.8023	-28.1152	-3.69566	-100.477	-10.4809								mean	sem
	[2-APB]	50uM	-17.5544	-48.4417	-4.40857	-108.369	-12.5627		0.00224697	0.0021887	9.99967e-05	0.000648639	0.00388924		0.00181471	0.000668221
		100uM	-14.02	-41.9338	-4.05809	-119.199	-9.5898		0.000130371	0.00148795	5.08364e-05	0.00153875	-0.00166476		0.000308628	0.000587218
		250uM	-16.9917	-40.3457	-15.4755	-177.788	-7.82998		0.00190999	0.00131694	0.00165231	0.00635414	-0.00495248		0.00125618	0.00180451
		500uM	-38.5432	-134.715	-103.638	-461.982	-14.2715		0.0148163	0.0114784	0.0140185	0.0297119	0.00708165		0.0154213	0.00381871
		2mM	-975.481	-4286.65	-2989.58	-9420.52	-172.895		0.575908	0.458547	0.418817	0.766008	0.303424		0.504541	0.07854
		4mM	-1977.47	-9301.67	-7583.7	-12325.1	-636.175		1.17596	0.99855	1.06321	1.00473	1.16893		1.08228	0.0385169
		6mM	-1683.65	-9315.14	-7133.03	-12267.5	-545.752		1	1	1	1	1		1	0
				Hill coeff	EC50
				3.3	0.0017025		5.78731
				4	0.0022377		7.60662
				3.3	0.001385		4.70803
				3.5	0.0020314		6.90534
				3.2	0.0020384		6.92914
			mean	3.46	0.001879
			sem	0.143527	0.000150414

## Sheet: rTRPV2+L538C
whole-cell		rTRPV2+L538C
gap-free; -80mV			raw				substracted&norm
	control	-49.603	-95.7747	-2.0522	-140.903							mean	sem
[2-APB]	50uM	-60.476	-162.737	-2.80922	-138.334		0.0206633	0.00504549	0.00302203	-0.000510644		0.00705505	0.00418512	5e-05
	100uM	-54.3746	-266.054	-2.72514	-144.91		0.00906807	0.0128302	0.00268638	0.000796477		0.00634529	0.0024986	0.0001
	500uM	-66.1358	-982.266	-19.2394	-450.328		0.0314194	0.0667955	0.0686114	0.0615048		0.0570828	0.00776922	0.0005
	1mM	-82.9655	-3654.53	-33.1096	-1548.35		0.0634029	0.268146	0.123981	0.27976		0.183822	0.0478862	0.001
	2mM	-222.932	-9271.67	-107.022	-3906.49		0.329399	0.691387	0.41904	0.748491		0.547079	0.0913492	0.002
	6mM	-575.801	-13367.5	-252.553	-5171.81		1	1	1	1		1	0	0.006
	8mM	-350.79	-9554.43	-135.496	-4133.1		0.572383	0.712692	0.532708	0.793534		0.652829	0.0543336	0.008
			Hill coeff	EC50
			1.9776	0.0015349		5.21759
			2.6559	0.0013885		4.71993
			1.4289	0.0027556		9.36712
			1.7719	0.0030429		10.3437
			1.95858	0.00218047	mean
			0.517052	0.000840345	sem

## Sheet: rTRPV2+L541M
whole-cell		rTRPV2+L541M
gap-free; -80mV			raw						leak-subtracted & norm
		control	-7.75845	-3.20022	-2.08178	-80.2717								mean	sem
	[2-APB]	50uM	-9.52104	-5.819	-2.23163	-78.8951			0.000210955	0.00093716	2.03546e-05	-8.83006e-05		0.000270042	0.000230812	5e-05
		100uM	-19.0026	-8.50242	-15.713	-158.471			0.00134576	0.00189745	0.00185157	0.00501601		0.0025277	0.000838802	0.0001
		500uM	-461.222	-95.6185	-536.295	-1215.69			0.0542727	0.0330729	0.0725637	0.0728302		0.0581849	0.00943024	0.0005
		1mM	-2574.41	-611.193	-2906.72	-4904.66			0.307189	0.217577	0.394545	0.309455		0.307192	0.0361324	0.001
		2mM	-7194.33	-1669.93	-6759.9	-8071.37			0.860124	0.596458	0.917934	0.512581		0.721774	0.0987781	0.002
		6mM	-11143.6	-3028.02	-10577.2	-13406.4			1.33279	1.08247	1.43645	0.854791		1.17662	0.130493	0.006
		8mM	-8363.03	-2797.58	-7364.07	-15670.2			1	1	1	1		1	0	0.008
				Hillcoef	EC50
				3.9995	0.0012436			4.22737
				2.9121	0.0016907			5.7472
				4.1828	0.0011181			3.80076
				1.7136	0.001792			6.09155
				3.202	0.0014611	mean
				0.569894	0.000165118	sem

## Sheet: rTRPV2+V553T
whole-cell		rTRPV2+V553T
gap-free; -80mV			raw						leak-subtracted & norm
		control	-2.36187	-37.102	-5.62657	-0.85876									mean	sem
	[2-APB]	10uM	-3.00493	-36.7933	-6.12099	-0.180969			0.000166878	-8.15259e-05	0.000263817	-0.000148199			5.02426e-05	9.83021e-05
		50uM	-3.84787	-44.0832	-5.92453	-0.26016			0.000385627	0.00184369	0.000158988	-0.000130884			0.000564356	0.000439349
		100uM	-6.7329	-50.7779	-12.6159	-32.3713			0.00113431	0.00361173	0.00372943	0.0068902			0.00384142	0.00117929
		500uM	-45.505	-111.843	-103.336	-292.99			0.0111959	0.0197387	0.0521366	0.0638743			0.0367364	0.0126322
		1mM	-508.751	-598.583	-644.785	-1274.99			0.131411	0.148284	0.341048	0.278588			0.224833	0.0508124
		2mM	-3792.38	-4047.87	-2285.26	-5288.33			0.983534	1.05922	1.21639	1.1561			1.10381	0.0515286
		6mM	-3855.83	-3823.63	-1879.73	-4574.39			1	1	1	1			1	0
			HillCoeff	EC50
			4	0.0013437
			4	0.001153
			4	0.0013428
			4	0.0011265
									0.0012415
			4	0.0012415	mean
			0	5.89942e-05	sem

## Sheet: V2 + L538C + L541M
whole-cell		rTRPV2+L538C+L541M
gap-free; -80mV			raw						leak-subtracted & norm
		control	-0.0254112	-0.0366885	-0.153544									mean	sem
	[2-APB]	0.1mM	-0.0370684	-0.0561928	-0.161809				0.00157978	0.0045661	0.00530292			0.00381627	0.00113829
		0.2mM	-0.104034	-0.165865	-0.176869				0.0106549	0.0302412	0.0149656			0.0186206	0.00594207
		0.5mM	-0.606701	-1.25522	-0.379819				0.078776	0.285267	0.145181			0.169741	0.0608608
		1mM	-2.49461	-3.04655	-1.06388				0.334624	0.704631	0.584082			0.541112	0.108951
		2mM	-5.5454	-4.17602	-1.6777				0.748065	0.969049	0.977916			0.898343	0.0751825
		6mM	-7.40443	-4.30823	-1.71212				1	1	1			1	0
		8mM	-4.01975	-3.7338	-1.14164				0.54131	0.865522	0.633974			0.680268	0.0964117
		12mM	-3.17308	-3.29218	-0.881502				0.42657	0.762135	0.467066			0.551924	0.105754
										Hill ceof	EC50
										2.5947	0.001305		4.43609
										2.7235	0.00070944		2.4116
										3.3739	0.00088498		3.00831
										2.89737	0.000966473	mean
										0.24115	0.000176686	sem

## Sheet: WT rTRPV1
whole-cell		WT rTRPV1
gap-free; -80mV			raw						leak-subtracted & norm
		control	-16.3051	-14.3812	-12.2139	-164.087	-139.536								mean	sem
	[2-APB]	10uM	-19.5145	-20.2798	-13.321	-171.113	-153.508		0.000246731	0.00197876	0.000777176	0.000528107	0.02006		0.00471816	0.00384681
		50uM	-32.3898	-19.631	-14.814	-208.033	-165.411		0.00123655	0.00176111	0.00182525	0.00330319	0.0371496		0.00905513	0.00703202
		100uM	-928.869	-248.367	-105.718	-2680.37	-305.58		0.0701557	0.0784935	0.0656392	0.189136	0.238395		0.128364	0.0357838
		500uM	-9467.26	-1959.46	-1090.46	-10548.4	-643.035		0.726566	0.652501	0.756921	0.780534	0.722889		0.727882	0.0215922
		1mM	-12503.2	-2713.08	-1317.67	-12436.4	-802.589		0.959962	0.905312	0.916421	0.922445	0.951966		0.931221	0.0105445
		2mM	-12889.8	-2876.29	-1339.84	-13556.7	-828.962		0.989683	0.960063	0.931984	1.00665	0.989831		0.975643	0.0132454
		6mM	-13024	-2995.34	-1436.73	-13468.2	-836.045		1	1	1	1	1		1	0
		Caps	-13683.3	-2641.69	-1362.01	-13321.2	-884.469		1.05069	0.881364	0.947547	0.988951	1.06952		0.987614	0.0343391
				HillCoeff	EC50						1.05069
				1.5135	0.00025188		0.13405				0.881364
				1.7103	0.00023831		0.126828				0.947547
				2.3148	0.0002923		0.155561				0.988951
				2.0276	0.00036037		0.191788				1.06952
				2.3448	0.00032803		0.174577
				1.9822	0.000294178	mean
				0.163977	2.28487e-05	sem

## Sheet: rTRPV1+M572V
whole-cell		rTRPV1 + M572V
gap-free; -80mV			raw						leak-subtracted & norm
		control	-438.403	-2.19942	-8.2542	-14.7798	-38.5405								mean	SEM
	[2-APB]	50uM	-402.587	-2.09928	-8.14533	-22.059	-47.3356		-0.00965587	-1.72084e-05	-3.46052e-06	0.000207906	0.0100315		0.000112564	0.00311325		5e-05
		100uM	-429.092	-2.35651	-10.4126	-19.1257	-43.6407		-0.00251021	2.69949e-05	6.86066e-05	0.000124126	0.00581715		0.000705333	0.00137248		0.0001
		500uM	-458.541	-23.8159	-111.405	-126.672	-45.2882		0.00542913	0.00371465	0.00327874	0.00319583	0.00769624		0.00466292	0.000858943		0.0005
		1mM	-600.936	-248.935	-1566.06	-1975.54	-75.37		0.0438183	0.0423999	0.0495162	0.0560026	0.0420067		0.0467488	0.00267657		1e-06
		2mM	-1025.03	-1057.18	-6948.69	-6322.98	-158.316		0.158153	0.181291	0.220608	0.180173	0.136613		0.175367	0.0139699		2e-06
		8mM	-4090.61	-5718.38	-33599	-28131	-644.184		0.984622	0.982288	1.06771	0.803047	0.69078		0.90569	0.0689456		8e-06
		12mM	-4147.65	-5821.45	-31468.8	-35026.7	-915.293		1	1	1	1	1		1	0		1.2e-05
		Caps	-8972.91	-12545	-83776.8	-79452.4	-1591.77		2.30087	2.1554	2.66265	2.26887	1.77157		2.23187	0.143078
			HillCoeff	EC50						2.30087
			3.4078	0.0031362			1.66908			2.1554
			3.5	0.0029			1.54337			2.66265
			3.5364	0.0032195			1.71341			2.26887
			3.2	0.0032595			1.7347			1.77157
			2.6261	0.0040616			2.16158
			3.25406	0.00331536	mean		1.76443
			0.167495	0.000196698	SEM

## Sheet: rTRPV1+C578L
whole-cell		rTRPV1 + L538C
gap-free; -80mV			raw							leak-subtracted & norm
		control	-107.406	-94.205	-200.866	-150.416	-1394.46	-3020.24								mean	sem
	[2-APB]	10uM	-101.089		-173.61	-140.873	-1245.52			-0.0098207	-0.00676279	-0.00637142	-0.000492121	-0.00905188		-0.00649978	0.00163889
		50uM	-111.573	-99.8863	-193.044	-132.668	-1315.17			0.00647821	0.000407849	-0.00182849	-0.000915242	-0.00481888		-0.000135309	0.00186339
		100uM	-133.916	-1034.3	-260.585	-408.306	-2129.14			0.0412137	0.0674876	0.01396	0.0132991	0.0446504		0.0361222	0.0102335
		500uM	-469.317	-9213.53	-1972.44	-8419.66	-13990.1			0.562644	0.654659	0.414127	0.426435	0.739794		0.559532	0.0634077
		1mM	-693.832	-12458.9	-3943.04	-16786	-17346			0.911685	0.887637	0.874778	0.857876	0.966112		0.899618	0.0188016
		2mM	-726.642	-13203.7	-4328.49	-18690	-17635.9			0.962693	0.941105	0.964882	0.956063	0.985663		0.962081	0.00721286
		6mM	-750.639	-14024.1	-4478.72	-19542	-17848.5			1	1	1	1	1		1	0
		10uM Caps	-700.293	-12299.7	-1853.3	-6074.04	-12571.2			0.92173	0.876209	0.386276	0.305474	0.644103		0.626758	0.124617
											0.92173
				Hillcoeff	EC50						0.876209
				2.8481	0.00045427		0.241762				0.386276
				1.9684	0.000352		0.187334				0.305474
				3.3344	0.00055167		0.293598				0.644103
				3.0328	0.00054774		0.291506
				2.5969	0.00033128		0.176307
				2.75612	0.000447392	mean
				0.230789	4.66758e-05	sem

## Sheet: rTRPV1+M581L
whole-cell		rTRPV1 + M581L
gap-free; -80mV			raw							leak-subtracted & norm
		control	-358.434	-92.3346	-120.512	-5.18968	-816.868									mean	sem
	[2-APB]	10uM	-261.481	-100.369	-125.788	-4.75468	-758.219		-0.00816016	0.0029684	9.88345e-05	-2.95643e-05	-0.0042188			-0.00186826	0.00194623
		50uM	-286.747	-99.3857	-126.865	-7.31647	-815.486		-0.00603362	0.00260511	0.00011901	0.000144545	-9.94114e-05			-0.000652873	0.00143361
		100uM	-588.167	-309.966	-1316.24	-405.758	-1328.27		0.0193357	0.0804063	0.0223994	0.0272242	0.0367867			0.0372305	0.0111908
		500uM	-4863.89	-1831.58	-30620.5	-7216.85	-7615.74		0.379207	0.642583	0.571351	0.490132	0.489063			0.514467	0.044262
		1mM	-10153	-2564.3	-47859.1	-12584.9	-12466.4		0.824371	0.913295	0.894279	0.854965	0.837985			0.864979	0.0168388
		2mM	-11790.2	-2704.05	-52782.5	-14383.3	-14010.3		0.962167	0.964927	0.986509	0.977191	0.949043			0.967967	0.00644161
		6mM	-12239.7	-2798.98	-53502.7	-14718.9	-14718.7		1	1	1	1	1			1	0
		10uM Caps	-8869.13	-2773.7	-58070	-10749.5	-10756.9		0.716312	0.99066	1.08556	0.730224	0.715016			0.847554	0.0792725
				HillCoef	EC50					0.716312
				2.9119	0.00058925		0.313598			0.99066
				2.0781	0.00037114		0.19752			1.08556
				2.6237	0.00044922		0.239074			0.730224
				2.567	0.00050954		0.271176			0.715016
				2.3174	0.00050536		0.268952
				2.49962	0.000484902	mean
				0.141562	3.61449e-05	sem

## Sheet: rTRPV1+T593V
whole-cell		rTRPV1 + T593V
gap-free; -80mV			raw							leak-subtracted & norm
		control	-22.1829	-7.35628	-16.7871	-23.5837									mean	sem
		10uM	-33.1776	-13.0117	-24.2157	-25.9399			0.00111569	0.0269361	0.00360525	0.000551728			0.0080522	0.0063295
	[2-APB]	50uM	-75.8457	-11.3878	-90.4489	-127.013			0.00544545	0.0192017	0.0357496	0.024219			0.0211539	0.00627824
		100uM	-1432.49	-122.898	-1340.34	-2352.48			0.143111	0.550312	0.642348	0.545334			0.470276	0.111312
		500uM	-8755.84	-207.66	-2052.87	-4174.36			0.886251	0.954024	0.988153	0.971945			0.950093	0.022393
		1mM	-10129.8	-229.542	-2131.33	-4386.33			1.02567	1.05825	1.02623	1.02158			1.03293	0.00850098
		2mM	-9775.46	-214.118	-2083.66	-4340.12			0.989717	0.984783	1.0031	1.01076			0.997089	0.00597747
		6mM	-9876.79	-217.313	-2077.28	-4294.17			1	1	1	1			1	0
		10uM Caps	-9945.33	-275.182	-2602.12	-5525.19			1.00696	1.27562	1.25472	1.28826			1.20639	0.0668362
										1.00696
				Hillcoef	EC50					1.27562
				2.4693	0.0002142					1.25472
				5.943	9.6636e-05					1.28826
				5.7264	9.056e-05
				5.5904	9.6853e-05
				4.93227	0.000124562	mean
				0.824195	2.99148e-05	sem

[truncated: 2 more sheets: V1 + C578L+M581L, V1 + M527V+C578L+M581L]
