# Supplementary material for: Cannabidiol sensitizes TRPV2 channels to activation by 2-APB
Source: eLife. 2023 May 18;12:e86166. doi: 10.7554/eLife.86166 (PMC10195083; doi:10.7554/eLife.86166)
Supplement: Figure 6—figure supplement 1—source data 2. [file elife-86166-fig6-figsupp1-data2.xlsx]

## Sheet: rTRPV1 WT - Caps
whole-cell		WT rTRPV1
gap-free; -80mV								sustracted & norm
	control	-0.00102505	-0.232306	-0.00332872	-0.00140317	-0.00312038								sem	mean
[Caps]	10 nM	-0.00252462	-0.237347	-0.0065469	-0.00143837	-0.00427592		0.0190518	0.00865319	0.00165922	8.75701e-05	0.00414804		0.00340606	0.00671995
	50 nM	-0.00412308	-0.290416	-0.209709	-0.0218345	-0.0154219		0.0393599	0.0997494	0.106405	0.0508288	0.0441588		0.0144334	0.0681004
	200 nM	-0.0191438	-0.584735
	500 nM	-0.048806	-0.65451	-1.65471	-0.3348	-0.207495		0.607048	0.724739	0.851416	0.82942	0.733644		0.0435493	0.749253
	1 uM	-0.0657001	-0.724588	-1.803	-0.388254	-0.245662		0.821684	0.845032	0.927871	0.962402	0.870652		0.0261149	0.885528
	10 uM	-0.0797354	-0.814866	-1.9429	-0.403367	-0.281695		1	1	1	1	1			1
	50 uM		-0.841171	-1.93455	-0.42772	-0.2782			1.04515	0.995695	1.06059	0.987454		0.0161454	1.02222
				Hill Coeff	EC50
				1.6266	3.925e-07
				1.2157	2.5312e-07
				1.6301	1.7233e-07
				1.8497	2.3287e-07
				1.6358	2.7029e-07
				1.59158	2.64222e-07	mean
				0.103096	3.60849e-08	sem

## Sheet: rTRPV1 + M572V
whole-cell		rTRPV1 + M572V
gap-free; -80mV								sustracted & norm
	control	-0.00134645	-0.00645758	-0.00415542	-0.00357636								mean	sem
[Caps]	10 nM	-0.00292891	-0.00745086	-0.00538556	-0.00482989			0.00343016	0.000326236	0.000175179	0.000188911		0.00103012	0.00080074
	50 nM	-0.00278218	-0.0094	-0.00613242	-0.0177278			0.00311211	0.000966419	0.000281536	0.00213267		0.00162318	0.000626354
	200 nM	-0.0194838	-0.0842465	-0.0575736	-0.380521			0.0393148	0.0255493	0.00760705	0.0568069		0.0323195	0.0104288
	500 nM	-0.145569	-0.848144	-0.752502	-2.48509			0.312619	0.276447	0.106569	0.373973		0.267402	0.0572648
	1 uM	-0.272466	-1.7313	-2.05804	-4.30537			0.587683	0.566514	0.292485	0.648296		0.523744	0.0790102
	10 uM	-0.445732	-2.77588	-6.49291	-6.42233			0.963257	0.909599	0.924035	0.967329		0.941055	0.0143248
	50 uM	-0.462683	-3.05112	-7.02635	-6.63912			1	1	1	1		1	0
	100 uM	-0.443545	-2.95665	-7.00128	-6.36424			0.958516	0.968972	0.99643	0.958575		0.970623	0.00894642
				Hill coeff	EC50
				1.8537	7.7774e-07
				1.8976	8.1652e-07
				1.5587	1.7686e-06
				1.8736	6.6811e-07
				1.7959	1.00774e-06	mean
				0.0795743	2.55558e-07	sem

## Sheet: C578L + M581L
whole-cell		rTRPV1 + M572V
gap-free; -80mV								sustracted & norm
		control	-0.003752	-0.00183472	-0.11666	2.37048e-05							mean	sem
	[Caps]	10 nM	-0.00415868	-0.00311391	-0.119728	-0.000675393		0.000784031	0.00257113	0.00711592	0.00288184		0.00333823	0.00134138
		50 nM	-0.0307054	-0.02278	-0.148209	-0.0201982		0.051963	0.0420993	0.0731747	0.0833591		0.0626491	0.00947005
		200 nM	-0.167258	-0.153858	-0.269467	-0.101668		0.31522	0.305562	0.354421	0.419196		0.3486	0.0257942
		500 nM	-0.322522	-0.317953	-0.394227	-0.180756		0.614551	0.635388	0.643789	0.745214		0.659735	0.029148
		1 uM	-0.416801	-0.403262	-0.456241	-0.224537		0.79631	0.806856	0.787624	0.925689		0.82912	0.0324289
		10 uM	-0.522934	-0.503367	-0.509429	-0.221244		1.00092	1.00806	0.910988	0.912114		0.958022	0.0268704
		50 uM	-0.522456	-0.499355	-0.547806	-0.242564		1	1	1	1		1	0
		100 uM	-0.499492	-0.480641	-0.532267	-0.2246		0.955728	0.962385	0.963959	0.925948		0.952005	0.00886686
								Hillcoeff	EC50
								1.3734	3.4412e-07
								1.4612	3.4133e-07
								1.2748	2.9532e-07
								1.7863	2.3203e-07
								1.47392	3.032e-07	mean
								0.110866	2.62291e-08	SEM

## Sheet: M572V + C578L + M581L
whole-cell		rTRPV1 + M572V + C578L + M581L
gap-free; -80mV								sustracted & norm
	control	-0.328362	-0.00415698	-0.00412013	-0.00451811								sem	mean
[Caps]	10 nM	-0.326329	-0.00207003	-0.00579657	-0.002498			-0.000703816	-0.00222998	0.0067479	-0.0016006		0.00208845	0.000553374
	50 nM	-0.318255	-0.00305547	-0.00453191	-0.0024822			-0.003499	-0.001177	0.00165747	-0.00161312		0.00106515	-0.00115791
	200 nM	-0.326369	-0.0379398	-0.00801179	-0.0227537			-0.000689968	0.0360982	0.0156645	0.0144487		0.00755221	0.0163803
	500 nM	-0.571315	-0.232143	-0.0272408	-0.191899			0.0841093	0.243611	0.0930638	0.148469		0.0366428	0.142313
	1 uM	-1.20443	-0.512702	-0.0820321	-0.59042			0.303291	0.543399	0.313606	0.464231		0.0587047	0.406132
	10 uM	-3.15952	-0.965793	-0.254747	-1.26321			0.980135	1.02754	1.00881	0.997306		0.00996023	1.00345
	50 uM	-3.2169	-0.940017	-0.252559	-1.26661			1	1	1	1		0	1
	100 uM	-2.80812	-0.819266	-0.219751	-1.12063			0.858482	0.870973	0.867943	0.884335		0.00534305	0.870433
								Hill coef	EC50
								2.2302	1.456e-06
								2.0094	9.0445e-07
								2.2964	1.3964e-06
								2.3419	1.0618e-06
								2.21948	1.20466e-06	mean
								0.0736839	1.32436e-07	sem
