# Supplementary material for: Cannabidiol sensitizes TRPV2 channels to activation by 2-APB
Source: eLife. 2023 May 18;12:e86166. doi: 10.7554/eLife.86166 (PMC10195083; doi:10.7554/eLife.86166)
Supplement: Figure 6—figure supplement 2—source data 1. [file elife-86166-fig6-figsupp2-data1.xlsx]

## Sheet: WT rTRPV1
whole-cell		WT rTRPV1
gap-free; -80mV			raw						leak-subtracted & norm
			Ex3	Ex6	Ex10	Ex21	Ex22
		control	-0.00177746	-0.00771062	-0.0101332	-0.069254	-0.00342078								mean	sem		Icbd/Icbd,40
		6mM 2APB	-1.82507	-8.05553	-1.50744	-4.39563	-0.857241		1232.95	342.618	270.365	203.978	662.518		542.485	189.701
		60uM 2APB	-0.00325627	-0.0311998	-0.0156713	-0.090464	-0.00470953		1	1	1	1	1		1	0								mean	sem
		60uM 2APB + 2 uM CBD	-0.00393132	-0.0300081	-0.0188982	-0.0941081	-0.00502938		1.45648	0.949266	1.58267	1.17181	1.24819		1.28168	0.110645		0.146326	0.18737	0.162423	0.237631	0.138896		0.174529	0.0178304
		60uM 2APB + 10 uM CBD	-0.0136843	-0.0895334	-0.0452763	-0.142031	-0.0121708		8.05164	3.48342	6.3457	3.43126	6.78954		5.62031	0.92636		0.808908	0.687573	0.651232	0.695825	0.755529		0.719813	0.0278674
		60uM 2APB + 40 uM CBD	-0.0164971	-0.126713	-0.0640972	-0.173845	-0.0150021		9.95371	5.06626	9.74414	4.93121	8.98648		7.73636	1.12935		1	1	1	1	1		1	0
		40uM CBD	-0.00466392	-0.0203202	-0.0313855	-0.0829414	-0.00782935		1.95188	0.536825	3.83747	0.645328	3.42081		2.07846	0.683467
		6mM 2APB + 40uM CBD	-1.21165	-6.437	-1.0705	-3.73263	-0.668375		818.139	273.713	191.468	172.719	515.968		394.401	122.316
									1232.95	1	1.45648	8.05164	9.95371	1.95188	818.139
									342.618	1	0.949266	3.48342	5.06626	0.536825	273.713
									270.365	1	1.58267	6.3457	9.74414	3.83747	191.468
									203.978	1	1.17181	3.43126	4.93121	0.645328	172.719
									662.518	1	1.24819	6.78954	8.98648	3.42081	515.968

## Sheet: V1 + M572V
whole-cell		rTRPV1 + M572V
gap-free; -80mV			raw						leak-subtracted & norm
		control	-0.00446694	-0.00454786	-0.0165772	-0.00895795	-0.211777								mean	sem
		12mM 2APB	-3.60484	-4.18728	-5.94431	-1.32762	-20.4009		16.9614	11.2392	10.5251	9.45806	9.40581		11.5179	1.40354
		1.5 mM 2APB	-0.216736	-0.376704	-0.579779	-0.14838	-2.35823		1	1	1	1	1		1	0
		1.5 mM 2APB + 2 uM CBD	-0.236596	-0.331548	-0.487566	-0.125017	-2.01202		1.09356	0.878664	0.83627	0.83243	0.838706		0.895926	0.0501109
		1.5 mM 2APB + 10 uM CBD	-0.223447	-0.330651	-0.498963	-0.12775	-2.06388		1.03162	0.876254	0.856506	0.852032	0.862867		0.895855	0.0341849
		1.5 mM 2APB + 40 uM CBD	-0.177046	-0.21794	-0.32024	-0.0760143	-1.38214		0.81302	0.573394	0.539172	0.480959	0.545254		0.59036	0.0576579
		40uM CBD	-0.00532492	-0.00605204	-0.0295716	-0.00973936	-0.311635		0.00404195	0.0040418	0.0230724	0.00560464	0.0465223		0.0166566	0.00828714
		12mM 2APB + 40uM CBD	-1.77405	-1.74413	-2.54386	-0.469198	-11.5199		8.33651	4.67433	4.48735	3.30106	5.26828		5.21351	0.843553
									16.9614	1	1.09356	1.03162	0.81302	0.00404195	8.33651
									11.2392	1	0.878664	0.876254	0.573394	0.0040418	4.67433
									10.5251	1	0.83627	0.856506	0.539172	0.0230724	4.48735
									9.45806	1	0.83243	0.852032	0.480959	0.00560464	3.30106
									9.40581	1	0.838706	0.862867	0.545254	0.0465223	5.26828
		control	-0.000920315	-0.0772153	-0.0197491	-0.0611609	-0.000636141								sem	mean		Icbd/Icbd40
		12mM 2APB	-0.750461	-12.6091	-14.7903	-49.4829	-5.86624		111.365	30.9711	23.338	29.196	31.3919		16.5906	45.2524
		0.75 mM 2APB	-0.00765081	-0.481847	-0.652646	-1.75392	-0.187487		1	1	1	1	1		0	1								mean	sem
		0.75 mM 2APB + 10 uM CBD	-0.00628564	-0.42031	-0.524034	-1.33598	-0.130427		0.797166	0.847918	0.796788	0.753101	0.694623		0.0256716	0.777919		0.552962	1.34711	1.45639	1.38982	1.47612		1.24448	0.174415
		0.75 mM 2APB + 40 uM CBD	-0.00718335	-0.380837	-0.398851	-1.14784	-0.110031		0.930546	0.750366	0.598995	0.641957	0.585466		0.0641741	0.701466		0.645482	1.19212	1.09486	1.18471	1.24415		1.07226	0.109364
		0.75 mM 2APB + 80 uM CBD	-0.0106232	-0.331905	-0.366006	-0.978418	-0.0885634		1.44163	0.629436	0.547098	0.541871	0.470575		0.180638	0.726122		1	1	1	1	1		1	0
		40uM CBD	-0.000755444	-0.080044	-0.0180288	-0.0439689	-0.000768271		-0.0244961	0.0069908	-0.00271814	-0.0101562	0.000707142		0.00540313	-0.0059345
		12mM 2APB + 40uM CBD	-0.188615	-6.69427	-6.83914	-20.563	-5.60043		27.8872	16.3533	10.7749	12.1115	29.9693		4.00337	19.4192
										111.365	1	0.797166	0.930546	1.44163	-0.0244961	27.8872
										30.9711	1	0.847918	0.750366	0.629436	0.0069908	16.3533
										23.338	1	0.796788	0.598995	0.547098	-0.00271814	10.7749
										29.196	1	0.753101	0.641957	0.541871	-0.0101562	12.1115
										31.3919	1	0.694623	0.585466	0.470575	0.000707142	29.9693

## Sheet: V1 + C578L
whole-cell		rTRPV1 + C578L
gap-free; -80mV			raw						leak-subtracted & norm
			Ex4	Ex20	Ex23	Ex2	Ex5
		control	-0.00348833	-0.00624796	-0.213666	-0.00226297	-0.0338704								mean	sem
		6mM 2APB	-2.31198	-8.40392	-2.99893	-1.20182	-4.13442		216.421	301.904	303.77	374.897	167.575		272.913	36.3873
		100uM 2APB	-0.014155	-0.0340637	-0.222835	-0.00546267	-0.0583403		1	1	1	1	1		1	0		Icbd/Icbd,40						mean	sem
		100uM 2APB + 2 uM CBD	-0.0110613	-0.0582288	-0.240564	-0.00861513	-0.0573198		0.709966	1.86876	2.93358	1.98524	0.958296		1.69117	0.397584		0.132473	0.162112	0.270549	0.116987	0.110506		0.158526	0.0293872
		100uM 2APB + 10 uM CBD	-0.0433161	-0.244238	-0.268528	-0.0524158	-0.230572		3.73385	8.55595	5.98342	15.6742	8.03851		8.39719	2.00851		0.696702	0.742218	0.551821	0.923658	0.926965		0.768273	0.0714075
		100uM 2APB + 40 uM CBD	-0.0606545	-0.326895	-0.313086	-0.056561	-0.24607		5.35933	11.5275	10.8431	16.9697	8.67186		10.6743	1.90588		1	1	1	1	1		1	0
		40uM CBD	-0.00788606	-0.0347119	-0.227833	-0.00687331	-0.0478307		0.412287	1.0233	1.5451	1.44087	0.570509		0.998413	0.226041
		6mM 2APB + 40uM CBD	-1.46729	-7.91244	-2.3923	-0.420484	-1.99036		137.231	284.234	237.609	130.706	79.9549		173.947	37.5955
									216.421	1	0.709966	3.73385	5.35933	0.412287	137.231
									301.904	1	1.86876	8.55595	11.5275	1.0233	284.234
									303.77	1	2.93358	5.98342	10.8431	1.5451	237.609
									374.897	1	1.98524	15.6742	16.9697	1.44087	130.706
									167.575	1	0.958296	8.03851	8.67186	0.570509	79.9549

## Sheet: V1 + M581L
whole-cell		rTRPV1 + M581L
gap-free; -80mV			raw						leak-subtracted & norm
			Ex7	Ex10	Ex11	Ex14	Ex17
		control	-0.00371218	-0.00609322	-0.00956665	-0.0064481	-0.00496133								mean	sem
		6mM 2APB	-7.62679	-2.39607	-21.5402	-12.2617	-1.7452		837.745	297.891	127.745	271.838	531.268		413.298	124.286
		100uM 2APB	-0.0128117	-0.0141162	-0.178111	-0.051531	-0.00823696		1	1	1	1	1		1	0		Icbd/Icbd,40						mean	sem
		100uM 2APB + 2 uM CBD	-0.0182914	-0.0183067	-0.197782	-0.04831	-0.00956211		1.6022	1.52231	1.11671	0.928554	1.40455		1.31486	0.126913		0.062812	0.108358	0.102133	0.0667006	0.0580053		0.0796019	0.0106051
		100uM 2APB + 10 uM CBD	-0.150314	-0.0941106	-1.98933	-0.548989	-0.0692072		16.1109	10.9707	11.7462	12.0343	19.6133		14.0951	1.64378		0.631608	0.780893	1.0743	0.864457	0.809993		0.83225	0.0717686
		100uM 2APB + 40 uM CBD	-0.235821	-0.118807	-1.85241	-0.634057	-0.0842779		25.5078	14.0489	10.9339	13.9212	24.2141		17.7252	2.97307		1	1	1	1	1		1	0
		40uM CBD	-0.0219816	-0.022298	-0.108598	-0.0303595	-0.0172732		2.00773	2.0198	0.587568	0.530387	3.75863		1.78082	0.591935
		6mM 2APB + 40uM CBD	-4.23074	-1.8703	-7.61921	-4.8269	-1.10568		464.533	232.358	45.1492	106.924	336.033		236.999	75.9364
									837.745	1	1.6022	16.1109	25.5078	2.00773	464.533
									297.891	1	1.52231	10.9707	14.0489	2.0198	232.358
									127.745	1	1.11671	11.7462	10.9339	0.587568	45.1492
									271.838	1	0.928554	12.0343	13.9212	0.530387	106.924
									531.268	1	1.40455	19.6133	24.2141	3.75863	336.033

## Sheet: V1 + T593V
whole-cell		rTRPV1 + T593V
gap-free; -80mV			raw						leak-subtracted & norm
			Ex5	Ex6	Ex16	Ex17	Ex18
		control	-0.00421527	-0.0114606	-0.0816555	-0.00886991	-0.0230414								mean	sem
		6mM 2APB	-2.22003	-1.45374	-0.828179	-0.568098	-0.677337		120.038	27.4769	14.7004	26.4774	10.9453		39.9275	20.2854
		60uM 2APB	-0.0226746	-0.0639513	-0.132438	-0.0299909	-0.08282		1	1	1	1	1		1	0
		60uM 2APB + 2 uM CBD	-0.0315049	-0.0943742	-0.132241	-0.0467073	-0.0807038		1.47837	1.57959	0.996121	1.79146	0.964599		1.36203	0.163877
		60uM 2APB + 10 uM CBD	-0.0894269	-0.217239	-0.227103	-0.0979047	-0.150002		4.61618	3.92028	2.86413	4.21546	2.12385		3.54798	0.459402
		60uM 2APB + 40 uM CBD	-0.138303	-0.33336	-0.288127	-0.157464	-0.184233		7.26395	6.1325	4.0658	7.03538	2.69648		5.43882	0.887889
		40uM CBD	-0.0255421	-0.0804665	-0.109344	-0.0505231	-0.0916754		1.15534	1.31463	0.545237	1.97212	1.14814		1.22709	0.22793
		6mM 2APB + 40uM CBD	-1.38914	-1.22366	-0.668424	-0.492505	-0.532078		75.0257	23.0936	11.5545	22.8983	8.51537		28.2175	12.0652
									120.038	1	1.47837	4.61618	7.26395	1.15534	75.0257
									27.4769	1	1.57959	3.92028	6.1325	1.31463	23.0936
									14.7004	1	0.996121	2.86413	4.0658	0.545237	11.5545
									26.4774	1	1.79146	4.21546	7.03538	1.97212	22.8983
									10.9453	1	0.964599	2.12385	2.69648	1.14814	8.51537

## Sheet: V1 + C578L + M581L
whole-cell		rTRPV1 + C578L + M581L
gap-free; -80mV
									sust & norm
		control	-0.0129492	-0.00449691	-0.0253003	-0.0250104	-0.0106808								sem	mean
		6mM 2APB	-17.4285	-4.54864	-4.37537	-4.09744	-5.59458		50.6755	199.063	203.626	41.2007	236.868		41.5106	146.287
		100uM 2APB	-0.356617	-0.0273246	-0.0466633	-0.123854	-0.0342547		1	1	1	1	1		0	1		Icbd/Icbd,40						mean	sem
		100uM 2APB + 2 uM CBD	-0.285806	-0.023346	-0.0495329	-0.128384	-0.0371672		0.793955	0.825712	1.13433	1.04583	1.12355		0.0731657	0.984674		0.122582	0.0369881	0.0315758	0.0419427	0.0379741		0.0542125	0.0171722
		100uM 2APB + 10 uM CBD	-0.774471	-0.113424	-0.189293	-0.581476	-0.121236		2.21587	4.77171	7.67648	5.62976	4.68973		0.879201	4.99671		0.342115	0.213751	0.213688	0.22578	0.158505		0.230768	0.030188
		100uM 2APB + 40 uM CBD	-2.23887	-0.514096	-0.792742	-2.48965	-0.708166		6.47695	22.3237	35.9239	24.9347	29.5872		4.91946	23.8493		1	1	1	1	1		1
		40uM CBD	-0.0684339	-0.0119947	-0.054489	-0.0322035	-0.0212742		0.161449	0.328452	1.36632	0.0727725	0.44937		0.232022	0.475673								1.131	0.0701506
		6mM 2APB + 40uM CBD	-5.42914	-2.09534	-3.62329	-3.28017	-2.88078		15.76	91.5924	168.422	32.9324	121.749		28.1535	86.0911		1	1	1				0.913636	0.0499533
																		1.26628	1.09557	1.03114
																		1.01171	0.881101	0.848097
		control	-0.00558529	-0.000211819	-0.00357531										sem	mean
		8mM 2APB	-1.44964	-1.81311	-6.5697				52.7079	165.495	39.293				40.0194	85.8321
		100uM 2APB	-0.0329826	-0.0111662	-0.170682				1	1	1				0	1
		100uM 2APB + 40 uM CBD	-0.232948	-0.192712	-1.98787				8.29872	17.5729	11.8744				2.7005	12.582
		100uM 2APB + 80 uM CBD	-0.29349	-0.21111	-2.04967				10.5085	19.2524	12.2442				2.67273	14.0017
		100uM 2APB + 100 uM CBD	-0.23561	-0.169824	-1.68645				8.39589	15.4835	10.0707				2.13877	11.3167
		8mM 2APB + 40uM CBD	-0.796656	-0.76799	-2.64757				28.874	70.0887	15.8222				16.3535	38.2616
											50.6755	1	0.793955	2.21587	6.47695	0.161449	15.76
											199.063	1	0.825712	4.77171	22.3237	0.328452	91.5924
											203.626	1	1.13433	7.67648	35.9239	1.36632	168.422
											41.2007	1	1.04583	5.62976	24.9347	0.0727725	32.9324
											236.868	1	1.12355	4.68973	29.5872	0.44937	121.749

## Sheet: V1+M572V+C578L+M581L
whole-cell		rTRPV1 + M57V + C578L + M581L
gap-free; -80mV
										sust & norm
		control	-0.00397465	-0.0016013	-0.0070382	-0.067717	-0.00297985	-0.0159665									sem	mean
		12mM 2APB	-36.4584	-3.9077	-1.88111	-7.68902	-3.16199	-8.56031		415.873	802.09	176.894	278.862	287.72	740.315		106.399	450.292
		750uM 2APB	-0.0916323	-0.0064712	-0.0176325	-0.095047	-0.0139593	-0.027508		1	1	1	1	1	1		0	1		Icbd/Icbd,40							mean	sem
		750uM 2APB + 10 uM CBD	-0.110582	-0.00985914	-0.0212385	-0.0884924	-0.0145172	-0.0474287		1.21618	1.69569	1.34037	0.760168	1.05081	2.72601		0.282202	1.46487		0.0436947	0.0828263	0.0814108	0.0462341	0.164974	0.198509		0.102941	0.0261886
		750uM 2APB + 40 uM CBD	-2.4438	-0.101302	-0.181466	-0.517069	-0.0729143	-0.174459		27.8336	20.4728	16.4643	16.4417	6.36958	13.7324		2.90764	16.8857		1	1	1	1	1	1		1	0
		750uM 2APB + 80 uM CBD	-2.27318	-0.0868367	-0.165403	-0.504542	-0.0616073			25.8871	17.5025	14.9481	15.9834	5.33974			3.27672	15.9322		0.930069	0.854913	0.90791	0.972122	0.83832			0.900667	0.0223638
		40uM CBD	-0.00619696	-0.0028657		-0.0435327	-0.00490914	-0.0136156		0.0253522	0.259636			0.175718	-0.203691		0.101615	0.0642538
		12mM 2APB + 40uM CBD	-16.8909	-1.36757		-8.11089	-1.94838	-8.43888		192.646	280.492		294.298	177.186	729.794		101.405	334.883
											415.873	1	1.21618	27.8336	25.8871	0.0253522	192.646
											802.09	1	1.69569	20.4728	17.5025	0.259636	280.492
											176.894	1	1.34037	16.4643	14.9481
											278.862	1	0.760168	16.4417	15.9834	-0.884899	294.298
											287.72	1	1.05081	6.36958	5.33974	0.175718	177.186
											740.315	1	2.72601	13.7324		-0.203691	729.794

## Sheet: WT rTRPV2
whole-cell		WT rTRPV2
gap-free; -80mV			raw						leak-subtracted & norm
		control	-0.00918015	-0.00940528	-0.00455478	-0.00644741								mean	sem		Ipot/Imax
		6mM 2APB	-2.48669	-5.83118	-2.74522	-5.35371			778.002	2143.34	590.574	270.127		945.51	412.813
		0.5mM 2APB	-0.0123646	-0.0121215	-0.00919546	-0.0262428			1	1	1	1		1	0							mean	sem
		0.5 mM 2APB + 2 uM CBD	-0.977585	-1.65733	-1.08453	-3.06331			304.104	606.698	232.719	154.423		324.486	98.9114		0.624141	1.12834	0.684267	1.07223		0.877244	0.129862
		0.5 mM 2APB + 10 uM CBD	-1.60705	-2.34522	-2.02155	-3.99401			501.773	859.95	434.634	201.439		499.449	136.314		1.02983	1.59934	1.27796	1.39868		1.32645	0.119031
		0.5 mM 2APB + 40 uM CBD	-1.2653	-1.63619	-1.68774	-3.78241			394.454	598.915	362.702	190.75		386.705	83.6997		0.809575	1.11387	1.06646	1.32446		1.07859	0.105757
		40uM CBD	-0.0505029	-0.00823998	-0.00523689	-0.00650184			12.9764	-0.429015	0.146985	0.00274963		3.17428	3.26967
		6mM 2APB + 40uM CBD	-1.56076	-1.46989	-1.58285	-2.85739			487.236	537.69	340.1	144.021		377.262	88.3243
			0.5mM2APB/2APB,max						778.002	1	304.104	501.773	394.454	12.9764	487.236
			0.00128534	0.000466562	0.00169327	0.00370197			2143.34	1	606.698	859.95	598.915	-0.429015	537.69
									590.574	1	232.719	434.634	362.702	0.146985	340.1
			mean	sem					270.127	1	154.423	201.439	190.75	0.00274963	144.021
			0.00178679	0.000687453

## Sheet: V2 + L538C
whole-cell		rTRPV2 + L538C
gap-free; -80mV			raw						leak-subtracted & norm
		control	-0.0275002	-0.00742043	-0.00887008	-0.0027751								mean	sem			Ipot/Imax
		6mM 2APB	-6.61644	-5.17188	-0.169504	-0.759517			60.7517	5.34955	11.0989	15.058		23.0645	12.7195
		0.5mM 2APB	-0.135957	-0.972822	-0.0233431	-0.0530303			1	1	1	1		1	0								mean	sem
		0.5 mM 2APB + 2 uM CBD	-3.30421	-6.07977	-0.134973	-0.651819			30.2121	6.28997	8.71297	12.915		14.5325	5.40272			1.12446	1.33495	0.895205	1.01326		1.09197	0.0935438
		0.5 mM 2APB + 10 uM CBD	-7.19935	-6.4508	-0.168105	-0.775809			66.1263	6.6743	11.0022	15.3822		24.7962	13.8909			2.46114	1.41651	1.13041	1.20682		1.55372	0.30846
		0.5 mM 2APB + 40 uM CBD	-7.79272	-6.19401	-0.164133	-0.735255			71.5974	6.40831	10.7277	14.5752		25.8272	15.3476			2.66477	1.36006	1.10221	1.14351		1.56764	0.370055
		40uM CBD	-0.153475	-0.0420648	-0.00760582	-0.0040087			1.16152	0.035886	-0.0873529	0.0245467		0.28365	0.293942
		6mM 2APB + 40uM CBD	-2.94153	-4.55618	-0.149735	-0.643327			26.8681	4.71178	9.73293	12.746		13.5147	4.74954
										60.7517	1	30.2121	66.1263	71.5974	1.16152	26.8681
										5.34955	1	6.28997	6.6743	6.40831	0.035886	4.71178
										11.0989	1	8.71297	11.0022	10.7277	-0.0873529	9.73293
										15.058	1	12.915	15.3822	14.5752	0.0245467	12.746

## Sheet: V2 + L541M
whole-cell		rTRPV2 + L541M
gap-free; -80mV			raw						leak-subtracted & norm
		control	-0.00200302	-0.00227135	-0.00276458	-0.188967								mean	sem			Ipot/Imax
		6mM 2APB	-1.8865	-0.241466	-0.832911	-2.61912			143.023	837.106	20.5656	12.421		253.279	196.888
		0.5mM 2APB	-0.0151792	-0.00255709	-0.0431304	-0.384616			1	1	1	1		1	0								mean	sem
		0.5 mM 2APB + 2 uM CBD	-1.27893	-0.123492	-0.62119	-2.2074			96.9118	424.234	15.3205	10.3166		136.696	97.8795			1.00118	0.983434	0.880584	0.825683		0.922721	0.0418673
		0.5 mM 2APB + 10 uM CBD	-1.46096	-0.119391	-0.798899	-2.69947			110.727	409.882	19.723	12.8317		138.291	93.238			1.14391	0.950163	1.13363	1.02697		1.06367	0.0461537
		0.5 mM 2APB + 40 uM CBD	-1.40474	-0.147843	-0.893562	-2.79914			106.46	509.455	22.0681	13.3411		162.831	117.433			1.09983	1.18099	1.26842	1.06775		1.15424	0.0449017
		40uM CBD	-0.00226052	-0.00645463	-0.00985665	-0.35514			0.0195428	14.6402	0.175695	0.849342		3.92119	3.57752
		6mM 2APB + 40uM CBD	-1.27742	-0.125534	-0.705055	-2.63353			96.7972	431.38	17.3981	12.4946		139.518	99.1871
										143.023	1	96.9118	110.727	106.46	0.0195428	96.7972
										837.106	1	424.234	409.882	509.455	14.6402	431.38
										20.5656	1	15.3205	19.723	22.0681	0.175695	17.3981
										12.421	1	10.3166	12.8317	13.3411	0.849342	12.4946

[truncated: 1 more sheets: V2 + L538C + L541M]
