# Supplementary material for: Cannabidiol sensitizes TRPV2 channels to activation by 2-APB
Source: eLife. 2023 May 18;12:e86166. doi: 10.7554/eLife.86166 (PMC10195083; doi:10.7554/eLife.86166)
Supplement: Figure 6—figure supplement 3—source data 1. [file elife-86166-fig6-figsupp3-data1.xlsx]

## Sheet: Q530A
whole-cell		rTRPV2 + Q530A
gap-free; -80mV								leak-subtracted & normalized
			1	3	10	22
		control	-2.46834e-12	-3.39749e-12	-6.81652e-12	-1.12088e-12								mean	sem
		0.5mM 2APB	-2.7115e-11	-8.04525e-10	-5.67843e-10	-2.07066e-11			1	1	1	1		1
		10uM CBD	-2.4846e-12	-3.71163e-11	-4.77629e-11	-5.53435e-12			0.000659704	0.0420892	0.0729848	0.225341		0.0852687	0.048985
		0.5mM 2APB + 10uM CBD	-2.43404e-09	-1.31766e-08	-1.55821e-08	-1.29946e-09			98.6573	16.4433	27.7621	66.2901		52.2882	18.7806
		0.5mM 2APB + 40uM CBD	-2.46818e-09	-1.26167e-08	-1.57854e-08	-1.22552e-09			100.042	15.7444	28.1245	62.5149		51.6066	18.9353
		0.5mM 2APB + 80uM CBD	-2.45477e-09	-1.25686e-08	-1.58309e-08	-1.20666e-09			99.4983	15.6844	28.2056	61.5519		51.2351	18.775
		12mM 2APB	-2.55808e-09	-1.25097e-08	-1.55347e-08	-1.19229e-09			103.69	15.6109	27.6776	60.8182		51.9492	19.7175
									0.000659704	98.6573	100.042	99.4983	103.69
									0.0420892	16.4433	15.7444	15.6844	15.6109
									0.0729848	27.7621	28.1245	28.2056	27.6776
									0.225341	66.2901	62.5149	61.5519	60.8182

## Sheet: Q530G
whole-cell		rTRPV2 + Q530G
gap-free; -80mV							leak-substracted & normalized
			24	25	27
		control	-2.28634e-10	-2.12591e-12	-4.61066e-13							mean	sem
		0.5mM 2APB	-6.03737e-10	-1.77468e-11	-7.5871e-11			1	1	1		1
		10uM CBD	-2.37945e-10	-9.80014e-12	-1.44581e-11			0.0248225	0.49128	0.185613		0.233905	0.136802
		0.5mM 2APB + 10uM CBD	-1.49874e-08	-7.77648e-09	-1.21952e-08			39.3459	497.69	161.713		232.916	137.018
		0.5mM 2APB + 40uM CBD	-1.44598e-08	-8.36586e-09	-1.10833e-08			37.9394	535.42	146.968		240.109	150.973
		0.5mM 2APB + 80uM CBD	-1.44892e-08	-7.61538e-09	-1.043e-08			38.0177	487.376	138.305		221.233	136.184
		12mM 2APB	-1.5165e-08	-9.14001e-09	-1.22335e-08			39.8194	584.978	162.221		262.339	165.144
								0.0248225	39.3459	37.9394	38.0177	39.8194
								0.49128	497.69	535.42	487.376	584.978
								0.185613	161.713	146.968	138.305	162.221
