# Supplementary material for: Cannabidiol sensitizes TRPV2 channels to activation by 2-APB
Source: eLife. 2023 May 18;12:e86166. doi: 10.7554/eLife.86166 (PMC10195083; doi:10.7554/eLife.86166)
Supplement: Figure 7—source data 1. [file elife-86166-fig7-data1.xlsx]

## Sheet: rTRPV1-12M
whole-cell								leak-substracted &norm
gap-free -80mV	2021-12-15
		ctrl	12mM 2APB	12mM 2APB+60uM CBD	10uM capsaicin				12mM 2APB	12mM 2APB+60uM CBD	10uM capsaicin
	Exp2	-7.78678e-12	-5.2328e-11	-9.14741e-11	-6.81688e-09				1	1.87887	152.872
	Exp3	-1.21987e-11	-3.85499e-10	-8.08308e-10	-1.22755e-08				1	2.13262	32.851
	Exp4	-8.14315e-12	-1.58226e-10	-5.24999e-10	-4.82686e-09				1	3.4438	32.107			1
	Ex5	-9.68961e-12	-7.31373e-11	-1.57566e-10	-1.5693e-08				1	2.33068	247.185			2.4465	0.345054
														116.254	52.0581
									1	2.4465	116.254	mean
										0.345054	52.0581	sem
		ctrl	12mM 2APB	12mM 2APB+100uM CBD	10uM capsaicin				12mM 2APB	12mM 2APB+100uM CBD	10uM capsaicin
	Ex6	-1.51685e-11	-4.83217e-10	-1.14878e-09	-1.69642e-08				1	2.422	36.2121			1
	Ex7	-7.2307e-12	-1.03017e-10	-3.01471e-10	-1.05207e-08				1	3.07184	109.76			2.7543	0.156302
	Ex8	-2.03901e-11	-1.33657e-10	-3.56104e-10	-5.6782e-09				1	2.96392	49.9511			70.1767	16.6904
	Ex9	-1.22116e-11	-8.65081e-11	-2.0237e-10	-6.31135e-09				1	2.55945	84.7838
									1	2.7543	70.1767	mean
										0.156302	16.6904	sem
									Total mean caps		93.2152
									SEM		26.7627

## Sheet: rTRPV1-14M
whole-cell								leak-substracted &norm
gap-free -80mV	2021-12-20
		ctrl	12mM 2APB	12mM 2APB+60uM CBD	12mM 2APB+100uM CBD	10uM capsaicin			12mM 2APB	12mM 2APB+60uM CBD	12mM 2APB+100uM CBD	10uM capsaicin
	Ex3	-4.20927e-12	-6.95871e-11	-7.41937e-11	-1.04793e-10	-6.89009e-09			1	1.07046	1.5385	105.324
	Ex10	-1.08833e-11	-1.00486e-10	-1.74678e-10	-2.43715e-10	-1.13301e-08			1	1.82801	2.59849	126.327
	Ex17	-1.75492e-11	-2.6564e-11	-3.79387e-11	-4.59068e-11	-1.1488e-09			1	2.26178	3.14567	125.488
	Ex21	-8.55806e-12	-1.38739e-11	-1.69089e-11	-1.7591e-11	-3.11935e-10			1	1.57094	1.69925	57.0704
	2021-12-21
	Ex9	-7.50025e-12	-4.52935e-11	-4.17484e-11	-5.85838e-11	-3.56816e-09			1	0.906198	1.35166	94.2142
										1.52748	2.06671	101.685	mean
										0.247615	0.344404	12.7148	sem
